# Supplementary material for: Event-related potentials evoked by skin puncture reflect activation of Aβ fibers: comparison with intraepidermal and transcutaneous electrical stimulations
Source: PeerJ. 2021 Oct 8;9:e12250. doi: 10.7717/peerj.12250 (PMC8504465; doi:10.7717/peerj.12250)
Supplement: Supplemental Information 1 [file peerj-09-12250-s001.xlsx]

## Sheet: Sheet1
Time (ms)	ERP data in three conditions
	click-only	click+SL	WN+SL
-125	-0.402981	-1.51207	-0.76699
-124.75	-0.392822	-1.54847	-0.796445
-124.5	-0.376262	-1.58335	-0.820668
-124.25	-0.360263	-1.60959	-0.848923
-124	-0.344023	-1.63822	-0.867259
-123.75	-0.328824	-1.66582	-0.88897
-123.5	-0.312664	-1.68958	-0.903945
-123.25	-0.300345	-1.70838	-0.915849
-123	-0.285385	-1.73198	-0.925321
-122.75	-0.272585	-1.75326	-0.93356
-122.5	-0.262746	-1.77814	-0.945064
-122.25	-0.250266	-1.7947	-0.942984
-122	-0.246506	-1.81334	-0.947864
-121.75	-0.242586	-1.8331	-0.949624
-121.5	-0.242986	-1.84566	-0.949944
-121.25	-0.244986	-1.86574	-0.946952
-121	-0.250346	-1.88342	-0.945528
-120.75	-0.258906	-1.89942	-0.941352
-120.5	-0.265306	-1.91446	-0.931929
-120.25	-0.280025	-1.92678	-0.918073
-120	-0.296425	-1.94446	-0.904729
-119.75	-0.317784	-1.9619	-0.886346
-119.5	-0.341623	-1.98045	-0.864315
-119.25	-0.366503	-1.99677	-0.840812
-119	-0.395142	-2.01693	-0.815084
-118.75	-0.422821	-2.03189	-0.782781
-118.5	-0.45538	-2.05677	-0.742638
-118.25	-0.487619	-2.07693	-0.710239
-118	-0.516498	-2.09693	-0.662113
-117.75	-0.544017	-2.11677	-0.61885
-117.5	-0.573776	-2.13589	-0.56426
-117.25	-0.602495	-2.15317	-0.511349
-117	-0.628975	-2.17565	-0.450759
-116.75	-0.657374	-2.19589	-0.391513
-116.5	-0.680013	-2.21933	-0.331163
-116.25	-0.707772	-2.23813	-0.263933
-116	-0.733851	-2.25813	-0.196175
-115.75	-0.760331	-2.27565	-0.122625
-115.5	-0.77913	-2.2946	-0.0517316
-115.25	-0.79777	-2.3142	0.0207462
-115	-0.819049	-2.32692	0.0901202
-114.75	-0.835448	-2.34084	0.154822
-114.5	-0.847928	-2.34692	0.225476
-114.25	-0.856648	-2.35948	0.290018
-114	-0.860567	-2.36196	0.352272
-113.75	-0.865367	-2.35948	0.412559
-113.5	-0.870407	-2.35844	0.467533
-113.25	-0.871687	-2.35692	0.524171
-113	-0.862967	-2.347	0.574633
-112.75	-0.855368	-2.33444	0.620152
-112.5	-0.844248	-2.32572	0.662695
-112.25	-0.825288	-2.30572	0.696838
-112	-0.811529	-2.28181	0.737989
-111.75	-0.79025	-2.25693	0.763027
-111.5	-0.76537	-2.22437	0.789235
-111.25	-0.739131	-2.19813	0.812354
-111	-0.712732	-2.15797	0.829362
-110.75	-0.686653	-2.11949	0.842337
-110.5	-0.652814	-2.07573	0.853057
-110.25	-0.620255	-2.03189	0.859217
-110	-0.587936	-1.98685	0.868992
-109.75	-0.548017	-1.9407	0.87136
-109.5	-0.515218	-1.89206	0.874864
-109.25	-0.476339	-1.84318	0.874368
-109	-0.44146	-1.7995	0.873616
-108.75	-0.400422	-1.7495	0.876608
-108.5	-0.365463	-1.70182	0.872112
-108.25	-0.326584	-1.65814	0.872736
-108	-0.294185	-1.61575	0.873968
-107.75	-0.255306	-1.57463	0.87792
-107.5	-0.216667	-1.53207	0.877264
-107.25	-0.174028	-1.48695	0.882432
-107	-0.14155	-1.44719	0.882544
-106.75	-0.105471	-1.40967	0.886688
-106.5	-0.0665118	-1.37471	0.89376
-106.25	-0.0341129	-1.33847	0.900288
-106	-0.00291376	-1.30448	0.903455
-105.75	0.0273252	-1.27576	0.913935
-105.5	0.0582045	-1.24208	0.923327
-105.25	0.0846835	-1.20936	0.93131
-105	0.111963	-1.18728	0.934878
-104.75	0.141962	-1.15848	0.946702
-104.5	0.167161	-1.13344	0.953726
-104.25	0.19844	-1.10568	0.959246
-104	0.223319	-1.08584	0.969821
-103.75	0.246839	-1.06336	0.982573
-103.5	0.276198	-1.0412	0.989229
-103.25	0.299637	-1.01944	1.00344
-103	0.320676	-1.00096	1.02027
-102.75	0.346995	-0.984646	1.02841
-102.5	0.373475	-0.968405	1.04123
-102.25	0.390674	-0.958486	1.0611
-102	0.412354	-0.945926	1.07401
-101.75	0.430913	-0.929527	1.08967
-101.5	0.450913	-0.922248	1.10228
-101.25	0.464752	-0.914807	1.1211
-101	0.470672	-0.903447	1.12906
-100.75	0.484591	-0.892089	1.14543
-100.5	0.494351	-0.888729	1.1581
-100.25	0.494911	-0.883368	1.16684
-100	0.500751	-0.875928	1.18012
-99.75	0.504591	-0.868568	1.18663
-99.5	0.498351	-0.86089	1.1989
-99.25	0.504671	-0.853289	1.20215
-99	0.497151	-0.84577	1.20981
-98.75	0.489551	-0.84089	1.2081
-98.5	0.485471	-0.83329	1.21085
-98.25	0.474512	-0.82209	1.21284
-98	0.468352	-0.809611	1.2065
-97.75	0.458432	-0.794331	1.19996
-97.5	0.447072	-0.778492	1.19753
-97.25	0.431072	-0.762413	1.18578
-97	0.423233	-0.738252	1.18413
-96.75	0.406033	-0.711053	1.17751
-96.5	0.397234	-0.690814	1.17578
-96.25	0.384834	-0.664496	1.17662
-96	0.364755	-0.637056	1.18322
-95.75	0.350995	-0.612097	1.18554
-95.5	0.334515	-0.588177	1.19561
-95.25	0.320836	-0.562338	1.20535
-95	0.307157	-0.534659	1.21597
-94.75	0.293557	-0.51466	1.22713
-94.5	0.285958	-0.49218	1.24154
-94.25	0.279878	-0.47226	1.25656
-94	0.273238	-0.452182	1.26628
-93.75	0.269558	-0.433542	1.27903
-93.5	0.265958	-0.423542	1.29336
-93.25	0.273398	-0.408662	1.30184
-93	0.276038	-0.398503	1.31375
-92.75	0.282198	-0.388824	1.318
-92.5	0.288118	-0.382504	1.32098
-92.25	0.298197	-0.374664	1.32664
-92	0.308117	-0.366184	1.32496
-91.75	0.325956	-0.362504	1.3146
-91.5	0.337316	-0.362584	1.31114
-91.25	0.353315	-0.353784	1.29597
-91	0.365795	-0.352424	1.28532
-90.75	0.379634	-0.355225	1.26714
-90.5	0.398354	-0.352425	1.24693
-90.25	0.414514	-0.351065	1.22508
-90	0.429873	-0.354904	1.20207
-89.75	0.444513	-0.353624	1.17724
-89.5	0.459632	-0.358744	1.15636
-89.25	0.468352	-0.364904	1.1269
-89	0.480912	-0.362264	1.1034
-88.75	0.488432	-0.372584	1.07111
-88.5	0.494591	-0.376024	1.03641
-88.25	0.503231	-0.387143	1.00768
-88	0.507071	-0.394823	0.970157
-87.75	0.505871	-0.404743	0.937295
-87.5	0.502111	-0.412423	0.895776
-87.25	0.504511	-0.422342	0.861889
-87	0.497071	-0.429702	0.824274
-86.75	0.494671	-0.444902	0.785331
-86.5	0.487312	-0.458661	0.764131
-86.25	0.486032	-0.474901	0.726452
-86	0.477072	-0.49226	0.700278
-85.75	0.475792	-0.50226	0.677399
-85.5	0.465632	-0.519699	0.656663
-85.25	0.469472	-0.537459	0.643047
-85	0.468352	-0.552498	0.628296
-84.75	0.460832	-0.559938	0.619816
-84.5	0.464512	-0.573218	0.616248
-84.25	0.470752	-0.580977	0.620231
-84	0.468272	-0.587217	0.631496
-83.75	0.478512	-0.586017	0.644344
-83.5	0.483471	-0.589697	0.670311
-83.25	0.490991	-0.592257	0.692134
-83	0.497151	-0.585937	0.733397
-82.75	0.504751	-0.581058	0.772692
-82.5	0.515951	-0.572098	0.817523
-82.25	0.52459	-0.562258	0.865697
-82	0.52835	-0.552098	0.925935
-81.75	0.53323	-0.533619	0.989628
-81.5	0.54211	-0.5185	1.05713
-81.25	0.53963	-0.50362	1.12657
-81	0.54467	-0.48346	1.19893
-80.75	0.55067	-0.466021	1.27284
-80.5	0.549549	-0.451221	1.34959
-80.25	0.54947	-0.433462	1.43579
-80	0.548589	-0.414742	1.51598
-79.75	0.54835	-0.399863	1.59604
-79.5	0.53955	-0.382104	1.6798
-79.25	0.53963	-0.379544	1.7597
-79	0.53339	-0.372424	1.8413
-78.75	0.51699	-0.358584	1.91699
-78.5	0.510671	-0.358664	1.99168
-78.25	0.495711	-0.352424	2.0532
-78	0.484672	-0.352264	2.12164
-77.75	0.468272	-0.348584	2.17649
-77.5	0.453472	-0.349945	2.22718
-77.25	0.435713	-0.349784	2.26833
-77	0.413153	-0.353624	2.30372
-76.75	0.390674	-0.358744	2.33557
-76.5	0.365795	-0.360104	2.35608
-76.25	0.338196	-0.367704	2.37115
-76	0.305797	-0.372424	2.37989
-75.75	0.272118	-0.382744	2.38285
-75.5	0.241959	-0.391303	2.38603
-75.25	0.20708	-0.403703	2.38079
-75	0.169401	-0.413622	2.37618
-74.75	0.129402	-0.424902	2.36186
-74.5	0.098443	-0.434742	2.35111
-74.25	0.0618044	-0.442502	2.3402
-74	0.0245254	-0.454981	2.32752
-73.75	-0.00803362	-0.461221	2.31261
-73.5	-0.0369129	-0.470021	2.30506
-73.25	-0.0680317	-0.473541	2.29151
-73	-0.0991506	-0.473621	2.2842
-72.75	-0.12403	-0.468661	2.27407
-72.5	-0.146749	-0.460021	2.2693
-72.25	-0.172989	-0.448581	2.26495
-72	-0.195708	-0.431222	2.26292
-71.75	-0.217867	-0.412823	2.25609
-71.5	-0.238027	-0.387383	2.25477
-71.25	-0.260426	-0.356104	2.25308
-71	-0.275385	-0.316186	2.25113
-70.75	-0.291545	-0.276347	2.24374
-70.5	-0.306664	-0.226108	2.24284
-70.25	-0.317944	-0.17763	2.24516
-70	-0.331704	-0.122832	2.24626
-69.75	-0.340423	-0.0600336	2.24349
-69.5	-0.351623	-0.00259513	2.24279
-69.25	-0.360503	0.063803	2.24639
-69	-0.367863	0.135001	2.25089
-68.75	-0.379062	0.194839	2.25076
-68.5	-0.375062	0.262517	2.25143
-68.25	-0.382742	0.323555	2.25373
-68	-0.395222	0.383713	2.24921
-67.75	-0.397942	0.449871	2.25279
-67.5	-0.401381	0.512349	2.25029
-67.25	-0.404981	0.573547	2.24666
-67	-0.411861	0.632505	2.24391
-66.75	-0.417621	0.683704	2.24031
-66.5	-0.419061	0.729783	2.22967
-66.25	-0.423941	0.787301	2.21641
-66	-0.423781	0.82626	2.21122
-65.75	-0.426421	0.864818	2.20433
-65.5	-0.428821	0.901057	2.1831
-65.25	-0.432661	0.931216	2.16407
-65	-0.436341	0.955935	2.14059
-64.75	-0.437621	0.977055	2.1119
-64.5	-0.44402	0.994974	2.08363
-64.25	-0.44394	1.00849	2.04873
-64	-0.45522	1.01481	2.0071
-63.75	-0.4565	1.02209	1.96781
-63.5	-0.467779	1.02225	1.92595
-63.25	-0.472819	1.02593	1.8844
-63	-0.484179	1.02233	1.83711
-62.75	-0.497779	1.01945	1.78663
-62.5	-0.507618	1.01849	1.73845
-62.25	-0.525138	1.01105	1.68738
-62	-0.545137	1.00857	1.63244
-61.75	-0.567696	1.00633	1.58132
-61.5	-0.590016	1.00729	1.52526
-61.25	-0.615215	1.00729	1.4664
-61	-0.645054	1.01489	1.40342
-60.75	-0.679213	1.01585	1.34482
-60.5	-0.711452	1.02593	1.28516
-60.25	-0.752971	1.03377	1.2226
-60	-0.79161	1.04745	1.16444
-59.75	-0.836568	1.06241	1.09854
-59.5	-0.878887	1.08113	1.0328
-59.25	-0.928885	1.10369	0.969917
-59	-0.972884	1.12737	0.909279
-58.75	-1.02024	1.15105	0.847857
-58.5	-1.06896	1.17729	0.794195
-58.25	-1.11264	1.20481	0.732997
-58	-1.15792	1.23849	0.678502
-57.75	-1.20152	1.26857	0.623656
-57.5	-1.24496	1.29481	0.571402
-57.25	-1.28511	1.32856	0.526779
-57	-1.32367	1.35856	0.475868
-56.75	-1.35759	1.38968	0.432926
-56.5	-1.38919	1.41744	0.388799
-56.25	-1.41751	1.4436	0.345792
-56	-1.44391	1.47352	0.304914
-55.75	-1.46519	1.50224	0.262547
-55.5	-1.48375	1.52224	0.223908
-55.25	-1.49527	1.55112	0.181877
-55	-1.50399	1.57112	0.144311
-54.75	-1.50127	1.58992	0.10964
-54.5	-1.50375	1.61352	0.068313
-54.25	-1.49743	1.62712	0.0255941
-54	-1.49879	1.64736	-0.00875682
-53.75	-1.48383	1.66471	-0.0400199
-53.5	-1.47511	1.67983	-0.071907
-53.25	-1.46399	1.69359	-0.0988822
-53	-1.45519	1.70215	-0.126929
-52.75	-1.44279	1.70991	-0.148368
-52.5	-1.42655	1.71863	-0.17344
-52.25	-1.41151	1.71855	-0.191023
-52	-1.39135	1.72967	-0.205519
-51.75	-1.37783	1.72359	-0.220462
-51.5	-1.35399	1.72127	-0.231518
-51.25	-1.33919	1.71879	-0.239806
-51	-1.31383	1.71343	-0.249438
-50.75	-1.28767	1.70247	-0.258605
-50.5	-1.2592	1.69135	-0.258173
-50.25	-1.2352	1.67887	-0.259581
-50	-1.20784	1.66111	-0.263549
-49.75	-1.1816	1.64607	-0.264077
-49.5	-1.14512	1.62728	-0.266621
-49.25	-1.11528	1.60376	-0.266749
-49	-1.084	1.58384	-0.269037
-48.75	-1.05152	1.56112	-0.270669
-48.5	-1.01888	1.53976	-0.278317
-48.25	-0.991604	1.51864	-0.28374
-48	-0.960245	1.50136	-0.293244
-47.75	-0.933765	1.47496	-0.300124
-47.5	-0.902886	1.45728	-0.312124
-47.25	-0.879127	1.43744	-0.321563
-47	-0.851368	1.42872	-0.332939
-46.75	-0.831608	1.40856	-0.342843
-46.5	-0.807689	1.39496	-0.349658
-46.25	-0.79025	1.38248	-0.362394
-46	-0.765211	1.37504	-0.370122
-45.75	-0.747691	1.36608	-0.380009
-45.5	-0.732812	1.35584	-0.389945
-45.25	-0.715372	1.35248	-0.396377
-45	-0.700332	1.3476	-0.406921
-44.75	-0.690252	1.34608	-0.419208
-44.5	-0.677774	1.3464	-0.42524
-44.25	-0.670254	1.3464	-0.438296
-44	-0.662734	1.35152	-0.453831
-43.75	-0.652894	1.35128	-0.463799
-43.5	-0.651534	1.35016	-0.48295
-43.25	-0.642814	1.35976	-0.502198
-43	-0.637775	1.36024	-0.515685
-42.75	-0.632815	1.36488	-0.531365
-42.5	-0.629455	1.36744	-0.553268
-42.25	-0.624254	1.3664	-0.571348
-42	-0.619134	1.364	-0.588387
-41.75	-0.607856	1.36992	-0.60981
-41.5	-0.601695	1.36888	-0.627394
-41.25	-0.595295	1.36264	-0.651473
-41	-0.581376	1.3612	-0.671968
-40.75	-0.565296	1.36144	-0.692752
-40.5	-0.550497	1.35752	-0.703567
-40.25	-0.531777	1.3536	-0.725167
-40	-0.509218	1.35504	-0.746878
-39.75	-0.486738	1.35024	-0.766062
-39.5	-0.46298	1.34768	-0.782285
-39.25	-0.440101	1.34648	-0.799788
-39	-0.419061	1.35016	-0.813852
-38.75	-0.397782	1.35136	-0.824124
-38.5	-0.375302	1.35136	-0.839467
-38.25	-0.352663	1.35288	-0.858795
-38	-0.336664	1.35264	-0.87361
-37.75	-0.320344	1.35888	-0.887434
-37.5	-0.302985	1.36136	-0.911689
-37.25	-0.288985	1.36504	-0.928201
-37	-0.279225	1.37504	-0.948408
-36.75	-0.267865	1.38264	-0.964536
-36.5	-0.259146	1.38872	-0.978007
-36.25	-0.257866	1.40144	-0.999031
-36	-0.257627	1.41016	-1.01754
-35.75	-0.254026	1.4188	-1.03341
-35.5	-0.256746	1.42872	-1.04936
-35.25	-0.258825	1.44008	-1.06373
-35	-0.264106	1.4524	-1.07752
-34.75	-0.269066	1.46248	-1.09109
-34.5	-0.276426	1.47384	-1.11228
-34.25	-0.285145	1.48128	-1.12191
-34	-0.295225	1.49104	-1.13959
-33.75	-0.297705	1.49768	-1.15221
-33.5	-0.305545	1.50384	-1.16915
-33.25	-0.315305	1.50984	-1.18835
-33	-0.317944	1.52008	-1.20834
-32.75	-0.323944	1.52888	-1.22723
-32.5	-0.332903	1.53136	-1.24907
-32.25	-0.330423	1.53896	-1.27248
-32	-0.336583	1.54376	-1.29365
-31.75	-0.343863	1.54888	-1.31873
-31.5	-0.345384	1.5524	-1.34564
-31.25	-0.350183	1.55616	-1.3699
-31	-0.351623	1.55888	-1.3922
-30.75	-0.349224	1.5636	-1.41654
-30.5	-0.347703	1.56656	-1.43334
-30.25	-0.345463	1.5676	-1.45298
-30	-0.341784	1.574	-1.46777
-29.75	-0.335544	1.56664	-1.47526
-29.5	-0.328983	1.5652	-1.48383
-29.25	-0.319224	1.56536	-1.48999
-29	-0.308024	1.56144	-1.49546
-28.75	-0.290585	1.55408	-1.49601
-28.5	-0.270506	1.55136	-1.50212
-28.25	-0.251466	1.54016	-1.50466
-28	-0.226587	1.53504	-1.51426
-27.75	-0.200348	1.52768	-1.51834
-27.5	-0.167949	1.52408	-1.51866
-27.25	-0.13523	1.51512	-1.53378
-27	-0.101551	1.50496	-1.53905
-26.75	-0.0589914	1.49272	-1.54935
-26.5	-0.0178727	1.48024	-1.55959
-26.25	0.0261256	1.46752	-1.57458
-26	0.0669243	1.45152	-1.58613
-25.75	0.114843	1.4412	-1.60986
-25.5	0.162121	1.42776	-1.624
-25.25	0.21212	1.40648	-1.64551
-25	0.260998	1.38888	-1.66931
-24.75	0.312117	1.3676	-1.69266
-24.5	0.368435	1.348	-1.71402
-24.25	0.418353	1.32512	-1.74053
-24	0.465632	1.30032	-1.76395
-23.75	0.51979	1.27545	-1.79369
-23.5	0.567069	1.25049	-1.81646
-23.25	0.616187	1.21801	-1.83876
-23	0.658106	1.18649	-1.86648
-22.75	0.697145	1.15657	-1.8922
-22.5	0.741944	1.12281	-1.90681
-22.25	0.775943	1.09289	-1.93387
-22	0.807222	1.05433	-1.95327
-21.75	0.838421	1.01913	-1.98119
-21.5	0.8633	0.986414	-2.00518
-21.25	0.88482	0.951616	-2.02837
-21	0.904739	0.915457	-2.05465
-20.75	0.923458	0.879218	-2.08156
-20.5	0.937138	0.837939	-2.10624
-20.25	0.949617	0.806739	-2.13196
-20	0.955937	0.765621	-2.15432
-19.75	0.965936	0.730422	-2.17389
-19.5	0.975777	0.690423	-2.19506
-19.25	0.978577	0.651865	-2.21786
-19	0.985856	0.612986	-2.22851
-18.75	0.994735	0.574347	-2.2512
-18.5	0.999616	0.538188	-2.26226
-18.25	1.00578	0.497949	-2.26854
-18	1.02105	0.46523	-2.27354
-17.75	1.02818	0.425551	-2.28387
-17.5	1.03337	0.392913	-2.2868
-17.25	1.04721	0.366594	-2.28968
-17	1.05721	0.332675	-2.28685
-16.75	1.07209	0.306756	-2.28805
-16.5	1.08337	0.280437	-2.28539
-16.25	1.09345	0.256358	-2.28421
-16	1.10969	0.231157	-2.28179
-15.75	1.12233	0.204118	-2.27702
-15.5	1.13625	0.186439	-2.27094
-15.25	1.15257	0.15764	-2.26882
-15	1.16865	0.14396	-2.25867
-14.75	1.18369	0.110441	-2.25549
-14.5	1.20089	0.0878816	-2.24544
-14.25	1.21369	0.0552425	-2.24134
-14	1.23345	0.0252434	-2.22851
-13.75	1.24857	-0.0057155	-2.21832
-13.5	1.27097	-0.0435535	-2.20111
-13.25	1.28353	-0.0821124	-2.18597
-13	1.30729	-0.121951	-2.17237
-12.75	1.32121	-0.16483	-2.14967
-12.5	1.34353	-0.214589	-2.13917
-12.25	1.35608	-0.260828	-2.11727
-12	1.37496	-0.313385	-2.10602
-11.75	1.386	-0.355864	-2.08975
-11.5	1.4036	-0.404663	-2.07825
-11.25	1.41352	-0.452421	-2.06748
-11	1.42472	-0.49826	-2.05977
-10.75	1.43728	-0.540739	-2.05353
-10.5	1.43864	-0.580978	-2.04754
-10.25	1.44592	-0.619856	-2.05039
-10	1.45232	-0.650815	-2.04772
-9.75	1.45336	-0.680735	-2.05309
-9.5	1.45256	-0.707293	-2.05311
-9.25	1.45096	-0.726973	-2.05884
-9	1.44696	-0.749852	-2.06756
-8.75	1.44224	-0.762332	-2.07009
-8.5	1.43192	-0.775852	-2.08258
-8.25	1.4248	-0.781132	-2.0877
-8	1.41344	-0.785932	-2.08887
-7.75	1.40328	-0.794652	-2.09249
-7.5	1.38832	-0.80129	-2.09516
-7.25	1.37216	-0.80345	-2.08986
-7	1.35832	-0.80241	-2.07996
-6.75	1.34105	-0.80601	-2.06801
-6.5	1.32721	-0.80593	-2.05426
-6.25	1.30617	-0.80337	-2.03215
-6	1.28337	-0.797132	-2.00612
-5.75	1.26601	-0.794411	-1.9774
-5.5	1.24481	-0.795852	-1.94366
-5.25	1.22377	-0.794731	-1.90608
-5	1.20249	-0.789611	-1.86438
-4.75	1.18241	-0.783531	-1.826
-4.5	1.15737	-0.771052	-1.78141
-4.25	1.13873	-0.759532	-1.73229
-4	1.11473	-0.747132	-1.68786
-3.75	1.08993	-0.730973	-1.63292
-3.5	1.06849	-0.708653	-1.57719
-3.25	1.03849	-0.693453	-1.51692
-3	1.01602	-0.673296	-1.45346
-2.75	0.982177	-0.652176	-1.38479
-2.5	0.958497	-0.629937	-1.31992
-2.25	0.930897	-0.612497	-1.24245
-2	0.906018	-0.588417	-1.16939
-1.75	0.877139	-0.570818	-1.08968
-1.5	0.84594	-0.552418	-1.00917
-1.25	0.822341	-0.542179	-0.921945
-1	0.808582	-0.519539	-0.837532
-0.75	0.778503	-0.504659	-0.747822
-0.5	0.761222	-0.488579	-0.660113
-0.25	0.743703	-0.473381	-0.572547
0	0.736344	-0.464901	-0.485334
0.25	0.724904	-0.446021	-0.395689
0.5	0.716264	-0.423463	-0.30638
0.75	0.719864	-0.399783	-0.218014
1	0.716185	-0.374744	-0.120545
1.25	0.717065	-0.338505	-0.0258762
1.5	0.727383	-0.301066	0.069929
1.75	0.737384	-0.252347	0.173302
2	0.747304	-0.204748	0.278066
2.25	0.763543	-0.14971	0.381215
2.5	0.774823	-0.087232	0.482844
2.75	0.792183	-0.0211544	0.582457
3	0.809701	0.0414025	0.687766
3.25	0.830741	0.111401	0.786723
3.5	0.85234	0.190439	0.882336
3.75	0.86738	0.266516	0.974045
4	0.890899	0.343795	1.07033
4.25	0.910818	0.433952	1.1582
4.5	0.928657	0.520028	1.24452
4.75	0.944657	0.616506	1.33003
5	0.963537	0.713942	1.40402
5.25	0.977376	0.810261	1.48419
5.5	0.994816	0.915137	1.5623
5.75	1.00234	1.01393	1.63332
6	1.00714	1.11513	1.70477
6.25	1.0197	1.21641	1.76696
6.5	1.02209	1.31153	1.82725
6.75	1.02345	1.39536	1.88509
7	1.02234	1.47872	1.9316
7.25	1.01858	1.5576	1.97593
7.5	1.01618	1.62496	2.01429
7.75	1.00858	1.68767	2.04283
8	0.996017	1.74015	2.06936
8.25	0.988336	1.78871	2.08342
8.5	0.972017	1.83007	2.09988
8.75	0.962097	1.87007	2.0983
9	0.944818	1.89743	2.10283
9.25	0.925938	1.92671	2.09807
9.5	0.910738	1.9439	2.08716
9.75	0.885939	1.95399	2.07822
10	0.860979	1.94623	2.05779
10.25	0.828581	1.94511	2.04064
10.5	0.795862	1.93263	2.02403
10.75	0.764823	1.90519	2.00985
11	0.719705	1.86999	1.98893
11.25	0.678505	1.83135	1.97459
11.5	0.634666	1.79151	1.96528
11.75	0.588349	1.73639	1.94962
12	0.53715	1.68143	1.94189
12.25	0.478432	1.62128	1.93973
12.5	0.431153	1.56536	1.93784
12.75	0.369636	1.50776	1.94334
13	0.313477	1.43872	1.94741
13.25	0.248438	1.37752	1.96086
13.5	0.184681	1.3124	1.97537
13.75	0.120762	1.24889	1.99069
14	0.0531646	1.17545	2.01019
14.25	-0.0105939	1.10409	2.04051
14.5	-0.0730713	1.02985	2.06576
14.75	-0.13931	0.957776	2.09307
15	-0.204347	0.885458	2.12771
15.25	-0.270425	0.802741	2.15937
15.5	-0.334184	0.723783	2.19994
15.75	-0.401701	0.646585	2.23897
16	-0.468099	0.562828	2.27716
16.25	-0.532898	0.48403	2.31852
16.5	-0.599135	0.398912	2.36056
16.75	-0.663053	0.308756	2.40653
17	-0.725612	0.216518	2.45275
17.25	-0.789209	0.129	2.50189
17.5	-0.849048	0.0362838	2.54744
17.75	-0.914006	-0.0673136	2.60289
18	-0.976643	-0.16219	2.64846
18.25	-1.04016	-0.264747	2.69214
18.5	-1.10424	-0.370985	2.73777
18.75	-1.17056	-0.473541	2.77914
19	-1.23544	-0.578658	2.82297
19.25	-1.29895	-0.684654	2.85381
19.5	-1.36303	-0.795851	2.87839
19.75	-1.42903	-0.900888	2.90287
20	-1.50399	-1.00472	2.92679
20.25	-1.57271	-1.10968	2.94182
20.5	-1.6439	-1.20952	2.95858
20.75	-1.71502	-1.31088	2.96403
21	-1.79518	-1.40335	2.97085
21.25	-1.86902	-1.49327	2.97352
21.5	-1.94517	-1.57799	2.97371
21.75	-2.01773	-1.6607	2.9661
22	-2.09021	-1.73454	2.95886
22.25	-2.16133	-1.80342	2.95034
22.5	-2.23021	-1.86678	2.94069
22.75	-2.2938	-1.9319	2.92722
23	-2.35372	-1.97685	2.91365
23.25	-2.40892	-2.02429	2.89554
23.5	-2.46036	-2.06797	2.88191
23.75	-2.49876	-2.10813	2.86098
24	-2.54116	-2.14325	2.84335
24.25	-2.57612	-2.17589	2.82879
24.5	-2.59859	-2.19949	2.8132
24.75	-2.61355	-2.23317	2.79428
25	-2.62723	-2.24429	2.77903
25.25	-2.63987	-2.27061	2.76303
25.5	-2.63883	-2.27949	2.74887
25.75	-2.63483	-2.29549	2.73791
26	-2.62995	-2.30181	2.72068
26.25	-2.61355	-2.3094	2.70826
26.5	-2.59371	-2.31436	2.70121
26.75	-2.57124	-2.3118	2.6902
27	-2.54476	-2.3194	2.68583
27.25	-2.51476	-2.31188	2.68498
27.5	-2.48868	-2.30948	2.68055
27.75	-2.45604	-2.30461	2.68481
28	-2.42012	-2.28957	2.6854
28.25	-2.38628	-2.27837	2.68343
28.5	-2.34468	-2.25933	2.69132
28.75	-2.30628	-2.24941	2.70337
29	-2.2714	-2.22853	2.7161
29.25	-2.23013	-2.20189	2.72591
29.5	-2.19525	-2.17701	2.73874
29.75	-2.15285	-2.15421	2.75791
30	-2.11765	-2.12941	2.77621
30.25	-2.08661	-2.10045	2.80138
30.5	-2.05013	-2.07933	2.81813
30.75	-2.02149	-2.05301	2.8469
31	-1.99533	-2.03189	2.87258
31.25	-1.96517	-2.01437	2.89959
31.5	-1.94133	-1.99661	2.93173
31.75	-1.91406	-1.97925	2.95418
32	-1.89638	-1.96422	2.98726
32.25	-1.87398	-1.95182	3.01395
32.5	-1.85654	-1.93558	3.04593
32.75	-1.83766	-1.93046	3.07208
33	-1.81654	-1.9183	3.09841
33.25	-1.8027	-1.90702	3.12523
33.5	-1.78638	-1.89446	3.15078
33.75	-1.77278	-1.88414	3.17057
34	-1.75398	-1.8683	3.19609
34.25	-1.73758	-1.85702	3.21665
34.5	-1.71894	-1.84102	3.24015
34.75	-1.7039	-1.8195	3.25748
35	-1.68278	-1.7983	3.28023
35.25	-1.67278	-1.7771	3.30513
35.5	-1.65662	-1.74862	3.33061
35.75	-1.64262	-1.71582	3.35004
36	-1.6291	-1.68598	3.37239
36.25	-1.6155	-1.64463	3.40093
36.5	-1.60254	-1.60847	3.42835
36.75	-1.59175	-1.55967	3.45323
37	-1.58927	-1.51079	3.47843
37.25	-1.58407	-1.46367	3.50866
37.5	-1.57559	-1.41215	3.53992
37.75	-1.57295	-1.35607	3.57265
38	-1.57159	-1.30216	3.60406
38.25	-1.57295	-1.24464	3.63198
38.5	-1.57287	-1.18952	3.66095
38.75	-1.57927	-1.12864	3.69215
39	-1.58175	-1.06984	3.71502
39.25	-1.58791	-1.01336	3.74124
39.5	-1.59926	-0.954806	3.769
39.75	-1.61286	-0.898728	3.789
40	-1.62774	-0.84001	3.8097
40.25	-1.63926	-0.786971	3.82159
40.5	-1.66046	-0.729613	3.83607
40.75	-1.68398	-0.673695	3.84802
41	-1.70646	-0.622176	3.85762
41.25	-1.73398	-0.571218	3.86061
41.5	-1.76142	-0.528499	3.86138
41.75	-1.79022	-0.48482	3.85872
42	-1.82142	-0.438262	3.85594
42.25	-1.8527	-0.399623	3.84855
42.5	-1.89134	-0.364664	3.84149
42.75	-1.92646	-0.322345	3.82313
43	-1.95757	-0.289626	3.8073
43.25	-1.99373	-0.257227	3.79118
43.5	-2.02781	-0.228588	3.76394
43.75	-2.05789	-0.199629	3.74316
44	-2.09669	-0.17595	3.7139
44.25	-2.12877	-0.149791	3.68276
44.5	-2.15901	-0.126031	3.6482
44.75	-2.18781	-0.104752	3.61356
45	-2.21653	-0.0923522	3.57473
45.25	-2.24885	-0.0821929	3.53138
45.5	-2.27268	-0.0684331	3.4909
45.75	-2.30028	-0.0624335	3.43568
46	-2.32164	-0.0549935	3.38832
46.25	-2.34276	-0.0598734	3.34095
46.5	-2.36412	-0.0585935	3.29177
46.75	-2.37884	-0.0685933	3.23535
47	-2.4014	-0.0695531	3.18332
47.25	-2.41148	-0.0775529	3.13171
47.5	-2.42636	-0.0872326	3.08302
47.75	-2.43012	-0.101312	3.02723
48	-2.43508	-0.116352	2.97352
48.25	-2.43652	-0.121072	2.92099
48.5	-2.43004	-0.129871	2.87843
48.75	-2.42044	-0.138511	2.83207
49	-2.40388	-0.144671	2.78578
49.25	-2.38388	-0.148511	2.7481
49.5	-2.36268	-0.153551	2.70942
49.75	-2.33004	-0.144831	2.67177
50	-2.28668	-0.139871	2.64905
50.25	-2.24525	-0.128751	2.61729
50.5	-2.19397	-0.113632	2.59622
50.75	-2.13661	-0.0896325	2.57344
51	-2.06869	-0.0633133	2.55675
51.25	-1.99661	-0.0409939	2.54285
51.5	-1.91894	-0.005955	2.52974
51.75	-1.83262	0.0328439	2.52512
52	-1.73894	0.0766824	2.51345
52.25	-1.64638	0.121641	2.51582
52.5	-1.54151	0.176759	2.51357
52.75	-1.43647	0.236837	2.51089
53	-1.32655	0.296916	2.51768
53.25	-1.21016	0.359154	2.52465
53.5	-1.09256	0.427711	2.53665
53.75	-0.967844	0.50131	2.54822
54	-0.852648	0.579067	2.56395
54.25	-0.731291	0.657465	2.58083
54.5	-0.606495	0.740182	2.60608
54.75	-0.484179	0.829139	2.6254
55	-0.361303	0.920016	2.65383
55.25	-0.242827	1.00913	2.68051
55.5	-0.11651	1.10889	2.7062
55.75	0.00476626	1.20521	2.73711
56	0.123323	1.30768	2.77017
56.25	0.248519	1.41288	2.80372
56.5	0.370995	1.51232	2.84205
56.75	0.489632	1.61632	2.8766
57	0.604668	1.71743	2.91989
57.25	0.720904	1.81871	2.9548
57.5	0.835621	1.91519	2.99893
57.75	0.940657	2.0115	3.03555
58	1.05081	2.09766	3.07814
58.25	1.15441	2.18622	3.1203
58.5	1.25697	2.26246	3.15462
58.75	1.35345	2.34133	3.19471
59	1.44688	2.40621	3.23265
59.25	1.5332	2.46253	3.2595
59.5	1.6148	2.51261	3.29165
59.75	1.69079	2.55493	3.31449
60	1.76303	2.59629	3.34288
60.25	1.83079	2.61637	3.36292
60.5	1.89447	2.62892	3.3781
60.75	1.94295	2.63029	3.39325
61	1.98695	2.62364	3.40271
61.25	2.02926	2.60629	3.41389
61.5	2.06814	2.57989	3.41503
61.75	2.08934	2.54013	3.41256
62	2.11318	2.49877	3.40915
62.25	2.12806	2.44021	3.40197
62.5	2.13814	2.37765	3.39146
62.75	2.1431	2.30629	3.3802
63	2.14182	2.23006	3.36317
63.25	2.13062	2.1451	3.34544
63.5	2.1167	2.05262	3.33058
63.75	2.10054	1.95126	3.30967
64	2.07686	1.84503	3.29468
64.25	2.04942	1.73903	3.27258
64.5	2.02055	1.61776	3.25689
64.75	1.98279	1.49752	3.23751
65	1.94671	1.37528	3.21966
65.25	1.90687	1.25025	3.20414
65.5	1.86287	1.12641	3.18862
65.75	1.82695	0.996414	3.16862
66	1.76943	0.872817	3.15923
66.25	1.72455	0.744103	3.13908
66.5	1.6708	0.618905	3.12003
66.75	1.61736	0.49427	3.1006
67	1.55936	0.379072	3.08811
67.25	1.50464	0.259077	3.06601
67.5	1.44816	0.144281	3.04297
67.75	1.38592	0.032923	3.0212
68	1.32177	-0.0809134	2.9944
68.25	1.26569	-0.18835	2.96381
68.5	1.20097	-0.293306	2.92965
68.75	1.13329	-0.392103	2.89768
69	1.07353	-0.489619	2.86167
69.25	1.00338	-0.584417	2.82316
69.5	0.943457	-0.675614	2.78609
69.75	0.875859	-0.764411	2.74134
70	0.814662	-0.846729	2.70225
70.25	0.745624	-0.924247	2.66347
70.5	0.683385	-0.999365	2.62542
70.75	0.620987	-1.072	2.58198
71	0.559869	-1.13944	2.54489
71.25	0.493631	-1.2044	2.51078
71.5	0.433393	-1.26184	2.47018
71.75	0.369555	-1.32056	2.43269
72	0.313477	-1.36551	2.39072
72.25	0.248439	-1.40799	2.36015
72.5	0.19092	-1.44695	2.32191
72.75	0.133402	-1.47447	2.28794
73	0.072044	-1.49823	2.24799
73.25	0.0146058	-1.51063	2.20914
73.5	-0.0477926	-1.52071	2.17738
73.75	-0.11131	-1.51319	2.14705
74	-0.171709	-1.50839	2.11359
74.25	-0.232906	-1.49543	2.08641
74.5	-0.297785	-1.47567	2.05339
74.75	-0.361703	-1.44567	2.02504
75	-0.428821	-1.41167	1.99736
75.25	-0.496579	-1.37319	1.97653
75.5	-0.563137	-1.33567	1.95248
75.75	-0.627775	-1.28952	1.93718
76	-0.687933	-1.24088	1.91534
76.25	-0.751371	-1.18576	1.90487
76.5	-0.809209	-1.13072	1.8977
76.75	-0.864327	-1.06944	1.89464
77	-0.914006	-1.01832	1.88717
77.25	-0.962964	-0.954486	1.89088
77.5	-1.00168	-0.897128	1.89095
77.75	-1.04168	-0.839449	1.89962
78	-1.07656	-0.788572	1.90687
78.25	-1.104	-0.728253	1.91483
78.5	-1.12128	-0.682095	1.92768
78.75	-1.1416	-0.630896	1.94286
79	-1.15288	-0.582098	1.95141
79.25	-1.15024	-0.528499	1.96285
79.5	-1.15288	-0.48698	1.98336
79.75	-1.14776	-0.440982	2.00158
80	-1.13024	-0.399384	2.01829
80.25	-1.1192	-0.355945	2.0328
80.5	-1.09256	-0.319626	2.05054
80.75	-1.06992	-0.287307	2.07476
81	-1.0452	-0.254587	2.09899
81.25	-1.01672	-0.232267	2.12206
81.5	-0.984084	-0.205948	2.15355
81.75	-0.946565	-0.193469	2.18282
82	-0.915286	-0.18083	2.21433
82.25	-0.878967	-0.168591	2.25748
82.5	-0.845128	-0.17099	2.29805
82.75	-0.821769	-0.166909	2.33541
83	-0.78561	-0.17851	2.37471
83.25	-0.755051	-0.18939	2.41912
83.5	-0.731452	-0.205709	2.46936
83.75	-0.706412	-0.232268	2.51648
84	-0.687773	-0.258028	2.55966
84.25	-0.671293	-0.298267	2.60598
84.5	-0.660094	-0.338504	2.65347
84.75	-0.653694	-0.381223	2.69553
85	-0.655214	-0.428261	2.74778
85.25	-0.660334	-0.47818	2.78583
85.5	-0.674173	-0.530979	2.82716
85.75	-0.685213	-0.580818	2.87018
86	-0.710252	-0.640816	2.90578
86.25	-0.733852	-0.703294	2.94533
86.5	-0.76753	-0.764572	2.9777
86.75	-0.80505	-0.82449	3.01208
87	-0.849048	-0.887208	3.04197
87.25	-0.886568	-0.954726	3.07353
87.5	-0.937525	-1.01704	3.0948
87.75	-0.983523	-1.086	3.12108
88	-1.04032	-1.15184	3.13612
88.25	-1.09248	-1.2196	3.15609
88.5	-1.14768	-1.28336	3.17241
88.75	-1.20632	-1.34575	3.18225
89	-1.26399	-1.41047	3.19449
89.25	-1.31503	-1.46695	3.19929
89.5	-1.37247	-1.52687	3.20004
89.75	-1.42647	-1.58583	3.19668
90	-1.47743	-1.63935	3.19455
90.25	-1.53119	-1.69182	3.19657
90.5	-1.58007	-1.7443	3.1874
90.75	-1.6311	-1.79678	3.17758
91	-1.68254	-1.85558	3.17185
91.25	-1.73246	-1.91422	3.16323
91.5	-1.78254	-1.97062	3.15139
91.75	-1.82878	-2.03045	3.1419
92	-1.88238	-2.09421	3.12113
92.25	-1.92861	-2.16061	3.10977
92.5	-1.97877	-2.23317	3.0971
92.75	-2.02373	-2.31045	3.08158
93	-2.07893	-2.38684	3.06576
93.25	-2.12749	-2.47052	3.0475
93.5	-2.17477	-2.56068	3.02755
93.75	-2.22605	-2.65043	3.00442
94	-2.28236	-2.74187	2.98426
94.25	-2.33364	-2.84411	2.96493
94.5	-2.3886	-2.94922	2.93827
94.75	-2.44484	-3.05306	2.91203
95	-2.50228	-3.16818	2.88747
95.25	-2.5598	-3.2757	2.85861
95.5	-2.62131	-3.39553	2.83376
95.75	-2.68459	-3.51577	2.79962
96	-2.75491	-3.63064	2.76695
96.25	-2.82611	-3.7532	2.73556
96.5	-2.88467	-3.8756	2.70678
96.75	-2.9597	-4.00455	2.67438
97	-3.03602	-4.12567	2.64441
97.25	-3.1097	-4.25415	2.61217
97.5	-3.18714	-4.37798	2.57913
97.75	-3.26489	-4.50678	2.54712
98	-3.34345	-4.64165	2.5176
98.25	-3.41969	-4.76373	2.48154
98.5	-3.49481	-4.89413	2.44986
98.75	-3.57449	-5.02644	2.41322
99	-3.65328	-5.15876	2.37883
99.25	-3.72984	-5.28667	2.34864
99.5	-3.81216	-5.42283	2.31055
99.75	-3.88472	-5.55163	2.27497
100	-3.96719	-5.6853	2.2362
100.25	-4.04079	-5.81162	2.20817
100.5	-4.12351	-5.94297	2.17167
100.75	-4.20463	-6.07393	2.13996
101	-4.28582	-6.20273	2.10961
101.25	-4.37206	-6.33016	2.06827
101.5	-4.4535	-6.46152	2.04104
101.75	-4.53966	-6.58903	2.00685
102	-4.62469	-6.71399	1.96798
102.25	-4.71597	-6.83663	1.93347
102.5	-4.80221	-6.96006	1.89197
102.75	-4.89964	-7.07902	1.85658
103	-4.99348	-7.19174	1.81706
103.25	-5.08716	-7.31133	1.78421
103.5	-5.1822	-7.42133	1.74013
103.75	-5.28099	-7.52637	1.68914
104	-5.38211	-7.63124	1.6445
104.25	-5.48083	-7.73356	1.59183
104.5	-5.58594	-7.83492	1.5362
104.75	-5.68714	-7.93131	1.47752
105	-5.78706	-8.02483	1.41382
105.25	-5.89449	-8.11507	1.34226
105.5	-5.99585	-8.19371	1.27143
105.75	-6.09473	-8.28282	1.18829
106	-6.19448	-8.36354	1.10785
106.25	-6.30424	-8.43874	1.0215
106.5	-6.40576	-8.51354	0.928142
106.75	-6.50208	-8.59233	0.833153
107	-6.59695	-8.65881	0.736549
107.25	-6.69567	-8.73129	0.629992
107.5	-6.78319	-8.80873	0.527259
107.75	-6.87214	-8.8812	0.419934
108	-6.96302	-8.95608	0.320673
108.25	-7.04422	-9.03096	0.21378
108.5	-7.13182	-9.10496	0.1046
108.75	-7.20845	-9.18207	0.00996251
109	-7.28197	-9.26079	-0.0955385
109.25	-7.35925	-9.34223	-0.190272
109.5	-7.43685	-9.42215	-0.28502
109.75	-7.50812	-9.50462	-0.37673
110	-7.57644	-9.5883	-0.457159
110.25	-7.64276	-9.67718	-0.536245
110.5	-7.70932	-9.76838	-0.615218
110.75	-7.78156	-9.85829	-0.684527
111	-7.84171	-9.94957	-0.751342
111.25	-7.90667	-10.0398	-0.820556
111.5	-7.96555	-10.1408	-0.883353
111.75	-8.02283	-10.236	-0.948328
112	-8.08051	-10.3384	-1.01146
112.25	-8.13779	-10.4296	-1.06866
112.5	-8.1941	-10.5281	-1.12997
112.75	-8.24282	-10.6209	-1.18443
113	-8.29282	-10.7195	-1.24856
113.25	-8.3429	-10.8146	-1.30612
113.5	-8.38674	-10.9048	-1.35969
113.75	-8.43178	-11.0022	-1.41526
114	-8.47666	-11.0925	-1.4666
114.25	-8.51409	-11.1884	-1.51668
114.5	-8.55273	-11.2772	-1.57017
114.75	-8.58657	-11.3669	-1.6204
115	-8.62545	-11.4498	-1.66706
115.25	-8.65929	-11.5322	-1.71744
115.5	-8.69185	-11.617	-1.7585
115.75	-8.72049	-11.6959	-1.80041
116	-8.75425	-11.7733	-1.83764
116.25	-8.78529	-11.8409	-1.87078
116.5	-8.80928	-11.9122	-1.90534
116.75	-8.83792	-11.9809	-1.93446
117	-8.87552	-12.0457	-1.96017
117.25	-8.91168	-12.1073	-1.98417
117.5	-8.94176	-12.1759	-2.00492
117.75	-8.98056	-12.2373	-2.02633
118	-9.01808	-12.3045	-2.03916
118.25	-9.05408	-12.3634	-2.05186
118.5	-9.09056	-12.4257	-2.06322
118.75	-9.12911	-12.4845	-2.07066
119	-9.17039	-12.547	-2.08151
119.25	-9.20799	-12.6045	-2.08732
119.5	-9.24767	-12.6621	-2.10109
119.75	-9.28271	-12.7182	-2.10784
120	-9.32271	-12.7708	-2.11005
120.25	-9.35423	-12.8247	-2.11852
120.5	-9.39023	-12.8718	-2.12898
120.75	-9.42159	-12.9205	-2.13543
121	-9.44895	-12.962	-2.14303
121.25	-9.4763	-13.0019	-2.15132
121.5	-9.4991	-13.0408	-2.15701
121.75	-9.51902	-13.0732	-2.16621
122	-9.53038	-13.1044	-2.17189
122.25	-9.5391	-13.1296	-2.18123
122.5	-9.53774	-13.1496	-2.18667
122.75	-9.53782	-13.1633	-2.19448
123	-9.52054	-13.1695	-2.20235
123.25	-9.50638	-13.1722	-2.21021
123.5	-9.48558	-13.1693	-2.21754
123.75	-9.45407	-13.1608	-2.22947
124	-9.41799	-13.147	-2.24275
124.25	-9.37287	-13.1248	-2.2576
124.5	-9.32679	-13.1033	-2.27968
124.75	-9.25671	-13.0734	-2.30064
125	-9.19423	-13.0373	-2.32817
125.25	-9.11288	-12.996	-2.35984
125.5	-9.0356	-12.9509	-2.39432
125.75	-8.94568	-12.8984	-2.43358
126	-8.85088	-12.8421	-2.47614
126.25	-8.74449	-12.7858	-2.52207
126.5	-8.63057	-12.713	-2.56839
126.75	-8.50929	-12.6432	-2.61743
127	-8.38562	-12.5758	-2.66413
127.25	-8.25186	-12.4922	-2.71896
127.5	-8.12315	-12.4124	-2.77174
127.75	-7.98547	-12.3299	-2.82393
128	-7.84203	-12.2409	-2.87731
128.25	-7.70044	-12.1472	-2.93324
128.5	-7.55676	-12.0521	-2.98369
128.75	-7.40693	-11.956	-3.0403
129	-7.25957	-11.8522	-3.09658
129.25	-7.11086	-11.751	-3.15136
129.5	-6.96078	-11.6461	-3.20695
129.75	-6.81727	-11.5398	-3.25439
130	-6.67207	-11.4373	-3.30795
130.25	-6.52711	-11.3274	-3.35678
130.5	-6.38456	-11.2172	-3.4051
130.75	-6.24344	-11.1138	-3.44811
131	-6.10689	-11.0087	-3.48695
131.25	-5.97713	-10.9048	-3.52923
131.5	-5.84586	-10.8013	-3.56591
131.75	-5.71962	-10.6999	-3.59895
132	-5.59338	-10.6012	-3.63119
132.25	-5.47843	-10.5012	-3.66089
132.5	-5.36467	-10.3987	-3.68704
132.75	-5.25211	-10.301	-3.71085
133	-5.151	-10.201	-3.73119
133.25	-5.04348	-10.1023	-3.74599
133.5	-4.93964	-10.0059	-3.76146
133.75	-4.84485	-9.90341	-3.77949
134	-4.74749	-9.80494	-3.79693
134.25	-4.65869	-9.7023	-3.81272
134.5	-4.56749	-9.59358	-3.82602
134.75	-4.4823	-9.48359	-3.8448
135	-4.3887	-9.37655	-3.86707
135.25	-4.30622	-9.26631	-3.88389
135.5	-4.21966	-9.15112	-3.90813
135.75	-4.14223	-9.04	-3.93804
136	-4.05999	-8.92	-3.96153
136.25	-3.98111	-8.80513	-3.98446
136.5	-3.90343	-8.68353	-4.01244
136.75	-3.83256	-8.57017	-4.04134
137	-3.75744	-8.45002	-4.06972
137.25	-3.68344	-8.32874	-4.1021
137.5	-3.61504	-8.20891	-4.13388
137.75	-3.54641	-8.09003	-4.16449
138	-3.47993	-7.97763	-4.19476
138.25	-3.41401	-7.85659	-4.22989
138.5	-3.35881	-7.73148	-4.25807
138.75	-3.29641	-7.61628	-4.29221
139	-3.23378	-7.50173	-4.3272
139.25	-3.17898	-7.37877	-4.36198
139.5	-3.11626	-7.25797	-4.39065
139.75	-3.06258	-7.1379	-4.42734
140	-3.01506	-7.01558	-4.45149
140.25	-2.95898	-6.89662	-4.48353
140.5	-2.90891	-6.77159	-4.51872
140.75	-2.84995	-6.64647	-4.54836
141	-2.80235	-6.52144	-4.57103
141.25	-2.74891	-6.39672	-4.59707
141.5	-2.69515	-6.26936	-4.62308
141.75	-2.63979	-6.14193	-4.64502
142	-2.58164	-6.00913	-4.67428
142.25	-2.5238	-5.87906	-4.69673
142.5	-2.46612	-5.74066	-4.71783
142.75	-2.40876	-5.6105	-4.74421
143	-2.34244	-5.47043	-4.75991
143.25	-2.28244	-5.32691	-4.78634
143.5	-2.21637	-5.18556	-4.80547
143.75	-2.14749	-5.04788	-4.82895
144	-2.07749	-4.90173	-4.84786
144.25	-2.00877	-4.75933	-4.86555
144.5	-1.93373	-4.61662	-4.89563
144.75	-1.86038	-4.47438	-4.91005
145	-1.77894	-4.33182	-4.93547
145.25	-1.69406	-4.19295	-4.96201
145.5	-1.61678	-4.05575	-4.98561
145.75	-1.52535	-3.90808	-5.01257
146	-1.43775	-3.77464	-5.04327
146.25	-1.35167	-3.64048	-5.07163
146.5	-1.26152	-3.50465	-5.10083
146.75	-1.16808	-3.37817	-5.12746
147	-1.06768	-3.24946	-5.15586
147.25	-0.977764	-3.12306	-5.18642
147.5	-0.880168	-3.00058	-5.21244
147.75	-0.78049	-2.88195	-5.24364
148	-0.687773	-2.76467	-5.26605
148.25	-0.584095	-2.64588	-5.29412
148.5	-0.484019	-2.53084	-5.31335
148.75	-0.376503	-2.41564	-5.33887
149	-0.268825	-2.29716	-5.35515
149.25	-0.168029	-2.18469	-5.37317
149.5	-0.0551516	-2.06693	-5.3937
149.75	0.0521248	-1.95854	-5.4053
150	0.172041	-1.83574	-5.4201
150.25	0.289798	-1.71718	-5.43306
150.5	0.408514	-1.59727	-5.43941
150.75	0.532109	-1.47591	-5.44349
151	0.651947	-1.34967	-5.44366
151.25	0.782102	-1.2184	-5.44059
151.5	0.914739	-1.08968	-5.43717
151.75	1.04193	-0.957286	-5.43307
152	1.16937	-0.827128	-5.42376
152.25	1.30945	-0.688253	-5.4148
152.5	1.44576	-0.553378	-5.40547
152.75	1.58056	-0.413303	-5.38174
153	1.72327	-0.275707	-5.36653
153.25	1.86079	-0.13971	-5.34592
153.5	2.00671	-0.006115	-5.32568
153.75	2.15334	0.127561	-5.29796
154	2.29694	0.261397	-5.27132
154.25	2.44453	0.386353	-5.24984
154.5	2.59317	0.516508	-5.22196
154.75	2.74284	0.638985	-5.19618
155	2.8894	0.759141	-5.17034
155.25	3.04195	0.880339	-5.1502
155.5	3.19315	1.00145	-5.13114
155.75	3.34282	1.11521	-5.11028
156	3.4917	1.23665	-5.09572
156.25	3.64794	1.35032	-5.07715
156.5	3.79297	1.46808	-5.06108
156.75	3.94425	1.58528	-5.0488
157	4.09176	1.70439	-5.03153
157.25	4.2356	1.82159	-5.02539
157.5	4.38311	1.94294	-5.01505
157.75	4.51815	2.05646	-5.00846
158	4.65422	2.17902	-5.00038
158.25	4.7907	2.29126	-4.9952
158.5	4.9167	2.41141	-4.9931
158.75	5.04421	2.53045	-4.98869
159	5.16565	2.64404	-4.98617
159.25	5.29164	2.75884	-4.98384
159.5	5.40684	2.88412	-4.97869
159.75	5.52444	2.99891	-4.97872
160	5.64043	3.11259	-4.97117
160.25	5.75531	3.22787	-4.96083
160.5	5.86043	3.3401	-4.94616
160.75	5.97546	3.45754	-4.92923
161	6.08562	3.57034	-4.91568
161.25	6.19034	3.68641	-4.89405
161.5	6.29913	3.80129	-4.86946
161.75	6.40177	3.91537	-4.84333
162	6.51561	4.03504	-4.80981
162.25	6.61673	4.15256	-4.77309
162.5	6.72776	4.27031	-4.72909
162.75	6.8292	4.39519	-4.68815
163	6.94175	4.51519	-4.63831
163.25	7.04431	4.63862	-4.58655
163.5	7.15295	4.76382	-4.53059
163.75	7.26262	4.88774	-4.4734
164	7.37414	5.01245	-4.40803
164.25	7.48446	5.14037	-4.34104
164.5	7.59421	5.265	-4.26727
164.75	7.70397	5.395	-4.19573
165	7.80901	5.5202	-4.11805
165.25	7.919	5.65011	-4.03683
165.5	8.02676	5.77491	-3.95326
165.75	8.13404	5.8977	-3.86758
166	8.24155	6.02506	-3.78013
166.25	8.35019	6.15402	-3.68743
166.5	8.45147	6.27377	-3.59137
166.75	8.5541	6.39849	-3.49635
167	8.65386	6.52496	-3.40038
167.25	8.7477	6.64248	-3.30008
167.5	8.84274	6.76216	-3.20012
167.75	8.93393	6.87607	-3.09879
168	9.02393	6.99495	-2.99842
168.25	9.11041	7.11231	-2.89848
168.5	9.19425	7.21966	-2.80354
168.75	9.27392	7.33718	-2.707
169	9.35264	7.44486	-2.60789
169.25	9.42136	7.55101	-2.51146
169.5	9.4928	7.65117	-2.41022
169.75	9.55632	7.75605	-2.31077
170	9.61399	7.85229	-2.21807
170.25	9.67023	7.947	-2.11589
170.5	9.72159	8.04348	-2.01865
170.75	9.77135	8.12708	-1.91348
171	9.81134	8.21828	-1.81475
171.25	9.85654	8.30819	-1.71726
171.5	9.8915	8.38571	-1.61936
171.75	9.92502	8.47346	-1.52287
172	9.95406	8.55466	-1.42271
172.25	9.98406	8.6397	-1.32502
172.5	10.0065	8.72314	-1.22456
172.75	10.0277	8.81186	-1.12602
173	10.0504	8.89321	-1.03053
173.25	10.0677	8.97817	-0.932552
173.5	10.0838	9.06833	-0.830972
173.75	10.0965	9.14961	-0.738222
174	10.109	9.2332	-0.645265
174.25	10.1227	9.31328	-0.551141
174.5	10.1327	9.39816	-0.462375
174.75	10.1442	9.47448	-0.37081
175	10.1565	9.55295	-0.281628
175.25	10.169	9.63199	-0.195023
175.5	10.184	9.70455	-0.115602
175.75	10.195	9.77559	-0.0330761
176	10.2086	9.84302	0.0509849
176.25	10.2289	9.91062	0.130327
176.5	10.2453	9.97966	0.20247
176.75	10.264	10.0481	0.283218
177	10.2838	10.1045	0.359872
177.25	10.3117	10.1646	0.442974
177.5	10.3364	10.2245	0.522506
177.75	10.3665	10.2806	0.597512
178	10.3952	10.3406	0.678823
178.25	10.4303	10.3945	0.759859
178.5	10.4651	10.4456	0.836418
178.75	10.5016	10.4919	0.912223
179	10.5439	10.542	0.996012
179.25	10.589	10.5934	1.07343
179.5	10.6378	10.6368	1.15716
179.75	10.6877	10.6782	1.22868
180	10.7462	10.7156	1.31364
180.25	10.8089	10.7579	1.39509
180.5	10.8762	10.7907	1.47281
180.75	10.9428	10.8219	1.5502
181	11.0126	10.8505	1.62751
181.25	11.0851	10.8757	1.70447
181.5	11.1614	10.8929	1.78592
181.75	11.2365	10.9131	1.86266
182	11.3091	10.937	1.94179
182.25	11.3853	10.952	2.01518
182.5	11.4617	10.9708	2.09465
182.75	11.5364	10.9895	2.17348
183	11.6127	11.0067	2.25169
183.25	11.6915	11.0332	2.33413
183.5	11.765	11.0518	2.41666
183.75	11.831	11.0819	2.50613
184	11.9063	11.1094	2.58856
184.25	11.9725	11.142	2.67803
184.5	12.0402	11.1755	2.76524
184.75	12.1037	11.2117	2.85935
185	12.1686	11.2507	2.956
185.25	12.2324	11.293	3.04859
185.5	12.2886	11.3419	3.14889
185.75	12.3475	11.3881	3.24986
186	12.4	11.4383	3.35592
186.25	12.4513	11.4958	3.46128
186.5	12.4973	11.5494	3.56744
186.75	12.5461	11.6143	3.68198
187	12.5852	11.6731	3.79829
187.25	12.6225	11.7392	3.91096
187.5	12.6565	11.8006	4.03256
187.75	12.6775	11.8694	4.15043
188	12.7013	11.9382	4.27178
188.25	12.721	12.0069	4.39037
188.5	12.73	12.0795	4.50912
188.75	12.7411	12.1594	4.62837
189	12.7435	12.2294	4.74823
189.25	12.7401	12.3117	4.85855
189.5	12.7337	12.3893	4.97789
189.75	12.7186	12.4693	5.09083
190	12.7001	12.5481	5.19979
190.25	12.6776	12.6282	5.30647
190.5	12.6473	12.7055	5.41815
190.75	12.6174	12.788	5.51775
191	12.581	12.8732	5.62245
191.25	12.541	12.9496	5.71883
191.5	12.4999	13.0318	5.82314
191.75	12.4601	13.1043	5.91282
192	12.4147	13.1832	6.00987
192.25	12.3712	13.2555	6.10498
192.5	12.3261	13.3294	6.19686
192.75	12.2887	13.4018	6.29052
193	12.2461	13.4731	6.38079
193.25	12.205	13.538	6.46809
193.5	12.1698	13.5995	6.55877
193.75	12.136	13.663	6.65133
194	12.1014	13.7183	6.74077
194.25	12.0738	13.7769	6.82687
194.5	12.0475	13.8193	6.9131
194.75	12.0238	13.8731	6.99796
195	12.0028	13.9119	7.08346
195.25	11.98	13.9495	7.16408
195.5	11.9689	13.9818	7.24342
195.75	11.9511	14.0093	7.32715
196	11.9362	14.0367	7.40868
196.25	11.9286	14.0617	7.49153
196.5	11.9189	14.078	7.57744
196.75	11.9126	14.0943	7.66109
197	11.9076	14.1055	7.74718
197.25	11.8986	14.1118	7.83454
197.5	11.9038	14.1219	7.92639
197.75	11.8988	14.1266	8.02208
198	11.8999	14.1304	8.11536
198.25	11.9014	14.128	8.2149
198.5	11.8988	14.1328	8.32045
198.75	11.9002	14.1343	8.42737
199	11.905	14.1367	8.53319
199.25	11.9074	14.1365	8.65012
199.5	11.9037	14.1455	8.76589
199.75	11.9063	14.1542	8.88089
200	11.9066	14.1606	8.99882
200.25	11.9013	14.1755	9.1176
200.5	11.9026	14.189	9.23827
200.75	11.9013	14.2068	9.35932
201	11.899	14.2281	9.4808
201.25	11.8966	14.2493	9.59673
201.5	11.8988	14.2802	9.71456
201.75	11.895	14.3066	9.83266
202	11.9002	14.3466	9.94747
202.25	11.8986	14.383	10.0579
202.5	11.9011	14.4265	10.1681
202.75	11.9029	14.4715	10.2794
203	11.9002	14.5218	10.3829
203.25	11.9138	14.577	10.4935
203.5	11.9189	14.6292	10.5968
203.75	11.9262	14.6843	10.7009
204	11.9376	14.7432	10.8003
204.25	11.9438	14.7979	10.898
204.5	11.9511	14.858	10.9972
204.75	11.9599	14.9107	11.0913
205	11.9764	14.9729	11.1754
205.25	11.9841	15.0329	11.264
205.5	12.0012	15.0929	11.3507
205.75	12.0088	15.1504	11.4322
206	12.0199	15.2093	11.5083
206.25	12.0339	15.2681	11.5914
206.5	12.0438	15.3305	11.6647
206.75	12.0514	15.3856	11.7369
207	12.0576	15.4431	11.8063
207.25	12.0614	15.4978	11.875
207.5	12.0678	15.5554	11.9412
207.75	12.0726	15.6066	12.006
208	12.0739	15.6692	12.0729
208.25	12.0738	15.7117	12.1394
208.5	12.0765	15.7692	12.2011
208.75	12.0725	15.8228	12.2672
209	12.0698	15.8741	12.3328
209.25	12.0688	15.9229	12.3993
209.5	12.0714	15.9717	12.4708
209.75	12.0638	16.0192	12.5353
210	12.064	16.0666	12.6087
210.25	12.0577	16.112	12.685
210.5	12.0574	16.1539	12.7547
210.75	12.0538	16.1979	12.8301
211	12.0549	16.2342	12.902
211.25	12.0489	16.2792	12.976
211.5	12.045	16.3191	13.0483
211.75	12.0386	16.3531	13.126
212	12.0325	16.3831	13.2013
212.25	12.0312	16.4234	13.2705
212.5	12.0286	16.4568	13.3479
212.75	12.0262	16.4867	13.4217
213	12.0224	16.5205	13.5008
213.25	12.0198	16.5504	13.5769
213.5	12.0187	16.5808	13.6601
213.75	12.0212	16.608	13.7397
214	12.0226	16.6255	13.8238
214.25	12.0261	16.6519	13.9117
214.5	12.03	16.6656	14.0023
214.75	12.0348	16.6778	14.0909
215	12.0436	16.6942	14.1908
215.25	12.0526	16.7043	14.2873
215.5	12.0613	16.7067	14.3853
215.75	12.0711	16.7078	14.4902
216	12.085	16.7119	14.6039
216.25	12.0936	16.7081	14.708
216.5	12.1123	16.7042	14.8242
216.75	12.1274	16.6955	14.936
217	12.1412	16.6917	15.0527
217.25	12.1575	16.6767	15.1683
217.5	12.1728	16.6693	15.2817
217.75	12.1864	16.6544	15.4034
218	12.2024	16.6382	15.5217
218.25	12.2123	16.6167	15.6355
218.5	12.221	16.6021	15.7469
218.75	12.2325	16.5867	15.861
219	12.2397	16.5655	15.968
219.25	12.2362	16.5518	16.0772
219.5	12.2386	16.5331	16.1791
219.75	12.2335	16.5119	16.2833
220	12.2276	16.498	16.3867
220.25	12.2124	16.4869	16.4873
220.5	12.1998	16.468	16.5775
220.75	12.185	16.4504	16.6703
221	12.1538	16.4343	16.7607
221.25	12.1298	16.418	16.8488
221.5	12.1011	16.4016	16.9269
221.75	12.0689	16.3891	17.0037
222	12.035	16.3743	17.08
222.25	12.0011	16.3579	17.1423
222.5	11.9638	16.3518	17.2042
222.75	11.9186	16.3356	17.2636
223	11.8823	16.3356	17.3154
223.25	11.8437	16.3268	17.3617
223.5	11.8052	16.3256	17.4078
223.75	11.7677	16.3206	17.4411
224	11.7316	16.3243	17.4726
224.25	11.6915	16.3216	17.5055
224.5	11.6578	16.328	17.5367
224.75	11.6252	16.3304	17.5558
225	11.5864	16.3393	17.5785
225.25	11.5526	16.3455	17.5965
225.5	11.524	16.3506	17.6142
225.75	11.4901	16.3591	17.6341
226	11.4588	16.3734	17.653
226.25	11.4264	16.3943	17.6663
226.5	11.3939	16.4106	17.6824
226.75	11.3628	16.4355	17.6999
227	11.3254	16.4618	17.7147
227.25	11.2939	16.4878	17.7333
227.5	11.2589	16.5141	17.751
227.75	11.2203	16.5479	17.7683
228	11.1851	16.5855	17.7884
228.25	11.1451	16.6178	17.8128
228.5	11.1015	16.6567	17.8381
228.75	11.064	16.6954	17.8633
229	11.0177	16.7331	17.8922
229.25	10.9702	16.7728	17.9267
229.5	10.9276	16.8055	17.9628
229.75	10.8838	16.8415	17.9998
230	10.834	16.8717	18.0489
230.25	10.7864	16.8979	18.0956
230.5	10.7376	16.923	18.1471
230.75	10.6925	16.9467	18.1973
231	10.6438	16.963	18.2532
231.25	10.5977	16.9704	18.3109
231.5	10.5563	16.9778	18.37
231.75	10.5103	16.9807	18.4343
232	10.465	16.9782	18.4938
232.25	10.4252	16.9667	18.5589
232.5	10.3841	16.9541	18.6215
232.75	10.3415	16.9344	18.6868
233	10.305	16.9154	18.75
233.25	10.269	16.8931	18.8129
233.5	10.2289	16.8604	18.8773
233.75	10.1928	16.8291	18.942
234	10.155	16.7954	19.0043
234.25	10.1189	16.7607	19.0727
234.5	10.0839	16.7215	19.1372
234.75	10.0464	16.6918	19.1969
235	10.0152	16.6466	19.2642
235.25	9.97646	16.6129	19.3242
235.5	9.93654	16.5804	19.3857
235.75	9.8963	16.5469	19.4502
236	9.86391	16.5127	19.5092
236.25	9.82383	16.4855	19.5731
236.5	9.77759	16.4595	19.6276
236.75	9.74263	16.438	19.693
237	9.70263	16.4204	19.7547
237.25	9.66871	16.4017	19.8192
237.5	9.62031	16.3915	19.8787
237.75	9.57895	16.3805	19.9373
238	9.54263	16.3766	19.9982
238.25	9.50143	16.3768	20.0533
238.5	9.46048	16.3805	20.1128
238.75	9.4188	16.3868	20.1666
239	9.38152	16.3955	20.2205
239.25	9.3452	16.4091	20.271
239.5	9.31264	16.4268	20.3159
239.75	9.27776	16.4428	20.3636
240	9.23896	16.4667	20.4017
240.25	9.20008	16.4907	20.4419
240.5	9.16361	16.5168	20.4716
240.75	9.13017	16.5442	20.5
241	9.09137	16.5754	20.5312
241.25	9.05977	16.6028	20.5534
241.5	9.02409	16.628	20.5765
241.75	8.98905	16.6516	20.5945
242	8.95265	16.6868	20.6107
242.25	8.91889	16.708	20.6308
242.5	8.88762	16.7343	20.6474
242.75	8.85626	16.7655	20.6627
243	8.82794	16.7903	20.6768
243.25	8.7989	16.8154	20.6988
243.5	8.76778	16.8376	20.7163
243.75	8.74402	16.8626	20.7364
244	8.71026	16.8791	20.7556
244.25	8.68634	16.9015	20.7671
244.5	8.66138	16.9218	20.7946
244.75	8.6377	16.9414	20.8106
245	8.61762	16.9617	20.8268
245.25	8.59003	16.9742	20.8444
245.5	8.56891	16.9966	20.8606
245.75	8.54251	17.0103	20.8786
246	8.52147	17.0242	20.8934
246.25	8.49619	17.0404	20.91
246.5	8.47139	17.0493	20.9293
246.75	8.44635	17.0654	20.9433
247	8.42027	17.0778	20.9607
247.25	8.39267	17.0867	20.9855
247.5	8.35763	17.0954	20.9967
247.75	8.32915	17.1091	21.0214
248	8.29147	17.1166	21.0429
248.25	8.26027	17.1292	21.067
248.5	8.2214	17.1418	21.0916
248.75	8.18268	17.149	21.1179
249	8.14404	17.1629	21.1427
249.25	8.1002	17.1728	21.1685
249.5	8.05652	17.1892	21.1966
249.75	8.01916	17.2066	21.2254
250	7.97516	17.2166	21.2552
250.25	7.92908	17.2305	21.2813
250.5	7.89645	17.2404	21.3115
250.75	7.85405	17.2555	21.3332
251	7.81813	17.2628	21.359
251.25	7.78029	17.2757	21.3837
251.5	7.73797	17.2827	21.4065
251.75	7.70813	17.2866	21.4266
252	7.67405	17.2892	21.442
252.25	7.64301	17.2915	21.4616
252.5	7.61421	17.2916	21.478
252.75	7.5827	17.289	21.4883
253	7.56054	17.2818	21.5032
253.25	7.53654	17.2741	21.5116
253.5	7.51662	17.2654	21.5219
253.75	7.4927	17.2518	21.5345
254	7.47542	17.2426	21.5418
254.25	7.45902	17.2217	21.5398
254.5	7.44286	17.2042	21.5471
254.75	7.42774	17.1881	21.5493
255	7.4167	17.1655	21.5423
255.25	7.41158	17.1426	21.5348
255.5	7.40414	17.123	21.5251
255.75	7.39654	17.1056	21.5105
256	7.38926	17.0779	21.4954
256.25	7.38422	17.058	21.4782
256.5	7.3827	17.0278	21.4569
256.75	7.37758	17.0081	21.4311
257	7.37526	16.9855	21.4004
257.25	7.37262	16.954	21.373
257.5	7.37174	16.9316	21.339
257.75	7.36878	16.9092	21.3058
258	7.36638	16.8791	21.2678
258.25	7.36382	16.8555	21.2327
258.5	7.35766	16.8293	21.197
258.75	7.34766	16.8057	21.1612
259	7.34286	16.7752	21.1154
259.25	7.33286	16.7492	21.0807
259.5	7.32134	16.7289	21.0378
259.75	7.3103	16.7031	21.0011
260	7.29758	16.6828	20.9611
260.25	7.28414	16.6542	20.9179
260.5	7.26878	16.6265	20.8761
260.75	7.25398	16.6019	20.8286
261	7.22759	16.5703	20.7805
261.25	7.21143	16.5454	20.7302
261.5	7.18399	16.512	20.6685
261.75	7.16135	16.484	20.6101
262	7.12999	16.4478	20.5407
262.25	7.10639	16.4179	20.469
262.5	7.07399	16.3853	20.3992
262.75	7.04375	16.3466	20.3224
263	7.01135	16.3092	20.2419
263.25	6.97623	16.2817	20.1615
263.5	6.94135	16.2406	20.0787
263.75	6.90528	16.1956	19.9959
264	6.87392	16.1544	19.9124
264.25	6.83864	16.1057	19.8296
264.5	6.80384	16.0592	19.7402
264.75	6.77256	16.0069	19.6549
265	6.7376	15.9541	19.5715
265.25	6.70776	15.9031	19.4807
265.5	6.6728	15.8504	19.3958
265.75	6.64128	15.7916	19.3126
266	6.61144	15.7392	19.2308
266.25	6.58152	15.6868	19.1474
266.5	6.54761	15.634	19.0671
266.75	6.51521	15.5854	18.9865
267	6.48273	15.5364	18.9047
267.25	6.45017	15.4881	18.8258
267.5	6.41513	15.4466	18.7474
267.75	6.38009	15.3993	18.6693
268	6.34033	15.3641	18.592
268.25	6.30161	15.3265	18.515
268.5	6.25898	15.2943	18.4407
268.75	6.21946	15.2642	18.3665
269	6.17634	15.2343	18.2857
269.25	6.12882	15.2031	18.2156
269.5	6.0789	15.1791	18.1448
269.75	6.03258	15.1529	18.0711
270	5.98162	15.1293	18.0022
270.25	5.93291	15.1005	17.9323
270.5	5.88139	15.0719	17.8689
270.75	5.82763	15.0479	17.8038
271	5.77787	15.018	17.7393
271.25	5.72787	14.9842	17.6717
271.5	5.67395	14.9529	17.6117
271.75	5.62555	14.9178	17.5369
272	5.58052	14.8828	17.4779
272.25	5.52676	14.8406	17.4093
272.5	5.48428	14.8055	17.3429
272.75	5.43924	14.7667	17.2719
273	5.39164	14.7268	17.2082
273.25	5.35404	14.6805	17.1394
273.5	5.31661	14.639	17.0757
273.75	5.27533	14.5957	17.0046
274	5.24181	14.5567	16.9323
274.25	5.20141	14.5082	16.8624
274.5	5.16669	14.4657	16.7927
274.75	5.13541	14.4232	16.7257
275	5.10045	14.3853	16.6486
275.25	5.06557	14.3444	16.5813
275.5	5.02781	14.3104	16.5104
275.75	4.99301	14.2783	16.4428
276	4.95533	14.2467	16.372
276.25	4.91934	14.2218	16.3088
276.5	4.87926	14.2007	16.2386
276.75	4.84542	14.1819	16.1738
277	4.80294	14.1655	16.1111
277.25	4.75942	14.1493	16.0454
277.5	4.71694	14.143	15.9872
277.75	4.67174	14.1303	15.9235
278	4.62815	14.1215	15.8601
278.25	4.58175	14.1118	15.7982
278.5	4.53431	14.0966	15.7356
278.75	4.48447	14.0842	15.6796
279	4.43671	14.0731	15.6199
279.25	4.38919	14.0593	15.5642
279.5	4.33671	14.0403	15.5082
279.75	4.2868	14.0218	15.4562
280	4.23568	13.9953	15.4076
280.25	4.18936	13.967	15.3628
280.5	4.13552	13.9255	15.3202
280.75	4.08416	13.8856	15.2782
281	4.04056	13.8355	15.2414
281.25	3.99057	13.7843	15.2064
281.5	3.94193	13.7244	15.1734
281.75	3.89689	13.6619	15.1427
282	3.84929	13.5931	15.1174
282.25	3.80697	13.5182	15.088
282.5	3.75937	13.4394	15.0633
282.75	3.71681	13.3581	15.04
283	3.67305	13.2745	15.0203
283.25	3.63049	13.1905	15.0032
283.5	3.58818	13.0993	14.985
283.75	3.55066	13.017	14.9664
284	3.5081	12.9256	14.9501
284.25	3.4733	12.833	14.936
284.5	3.43042	12.7445	14.918
284.75	3.3869	12.6543	14.8945
285	3.35194	12.5594	14.8753
285.25	3.31331	12.4708	14.8511
285.5	3.27939	12.3769	14.8241
285.75	3.23955	12.2832	14.79
286	3.20075	12.1915	14.7602
286.25	3.16339	12.102	14.7194
286.5	3.12435	12.0046	14.6849
286.75	3.08707	11.9193	14.6421
287	3.05059	11.8243	14.5964
287.25	3.01059	11.7394	14.5484
287.5	2.96948	11.6469	14.5037
287.75	2.93076	11.5596	14.4483
288	2.88708	11.4683	14.398
288.25	2.84724	11.3783	14.339
288.5	2.80052	11.2931	14.2879
288.75	2.7618	11.2158	14.2215
289	2.71956	11.1307	14.1559
289.25	2.67452	11.0584	14.1
289.5	2.63461	10.9795	14.0365
289.75	2.59197	10.9072	13.9792
290	2.55325	10.8321	13.9181
290.25	2.51949	10.761	13.8591
290.5	2.47925	10.6982	13.7977
290.75	2.44333	10.6272	13.7398
291	2.41301	10.5696	13.6795
291.25	2.38189	10.5084	13.6172
291.5	2.34709	10.4496	13.5581
291.75	2.31965	10.392	13.495
292	2.2907	10.3368	13.4317
292.25	2.2659	10.2871	13.3671
292.5	2.2407	10.2396	13.3019
292.75	2.2183	10.1935	13.2321
293	2.1983	10.1496	13.1606
293.25	2.17926	10.1071	13.095
293.5	2.1671	10.0659	13.0214
293.75	2.15326	10.0243	12.9489
294	2.13446	9.98446	12.8737
294.25	2.12158	9.94438	12.7958
294.5	2.1095	9.91334	12.7211
294.75	2.0995	9.88086	12.6443
295	2.08462	9.8483	12.5618
295.25	2.07486	9.82079	12.4801
295.5	2.06574	9.79695	12.3977
295.75	2.0519	9.77071	12.3174
296	2.0407	9.75567	12.2393
296.25	2.03438	9.73215	12.1582
296.5	2.01694	9.70847	12.0855
296.75	2.00318	9.68319	12.013
297	1.98591	9.66447	11.9441
297.25	1.97591	9.64439	11.8817
297.5	1.95455	9.60927	11.8202
297.75	1.94343	9.58455	11.7701
298	1.92607	9.55055	11.7182
298.25	1.91343	9.51727	11.6734
298.5	1.89967	9.4808	11.63
298.75	1.88847	9.43584	11.5918
299	1.87975	9.38824	11.5572
299.25	1.86959	9.33336	11.5262
299.5	1.85839	9.27832	11.4971
299.75	1.85319	9.21464	11.4646
300	1.85447	9.15816	11.4421
300.25	1.85215	9.08969	11.4152
300.5	1.85319	9.02073	11.3898
300.75	1.85199	8.94465	11.3662
301	1.85831	8.8669	11.3361
301.25	1.86711	8.78962	11.3083
301.5	1.87343	8.71082	11.2789
301.75	1.87959	8.62322	11.2413
302	1.89711	8.53962	11.201
302.25	1.90695	8.45059	11.1582
302.5	1.92695	8.36835	11.1155
302.75	1.94575	8.27323	11.0642
303	1.96215	8.18587	11.0133
303.25	1.98582	8.0934	10.9545
303.5	2.01222	7.997	10.9
303.75	2.0371	7.90724	10.8392
304	2.05974	7.81253	10.7743
304.25	2.08686	7.71957	10.7092
304.5	2.11822	7.62581	10.6416
304.75	2.1435	7.53837	10.5711
305	2.17198	7.44358	10.499
305.25	2.2059	7.3595	10.4225
305.5	2.23086	7.2759	10.3502
305.75	2.26438	7.19102	10.2762
306	2.29582	7.11223	10.2009
306.25	2.32454	7.03207	10.1164
306.5	2.35293	6.95975	10.0454
306.75	2.38701	6.88584	9.97095
307	2.41437	6.81488	9.88915
307.25	2.44701	6.75576	9.81701
307.5	2.47205	6.69504	9.74293
307.75	2.49573	6.63712	9.67087
308	2.52469	6.58984	9.59648
308.25	2.54685	6.54352	9.52804
308.5	2.55453	6.49353	9.45894
308.75	2.57677	6.44977	9.39438
309	2.59197	6.41849	9.32947
309.25	2.60077	6.38721	9.26635
309.5	2.60317	6.35601	9.2077
309.75	2.61085	6.33345	9.14975
310	2.61813	6.30849	9.09569
310.25	2.62069	6.28753	9.04489
310.5	2.61693	6.27593	8.99298
310.75	2.61085	6.25713	8.947
311	2.60717	6.24345	8.90348
311.25	2.59957	6.23217	8.85523
311.5	2.58973	6.21962	8.8094
311.75	2.58085	6.2097	8.76566
312	2.56965	6.19194	8.72085
312.25	2.55197	6.1849	8.67381
312.5	2.53461	6.1785	8.63002
312.75	2.51093	6.16722	8.58389
313	2.49213	6.14834	8.53882
313.25	2.46597	6.13234	8.48873
313.5	2.43701	6.1161	8.44318
313.75	2.40573	6.09338	8.403
314	2.37205	6.0685	8.35843
314.25	2.33973	6.03098	8.31574
314.5	2.30086	5.99202	8.27504
314.75	2.26582	5.94706	8.23142
315	2.2147	5.88963	8.18552
315.25	2.16974	5.82875	8.15187
315.5	2.12086	5.76091	8.10933
315.75	2.07086	5.68835	8.06866
316	2.0135	5.60715	8.03626
316.25	1.95967	5.51868	7.99959
316.5	1.90487	5.42204	7.96606
316.75	1.84247	5.327	7.93217
317	1.78471	5.22484	7.9045
317.25	1.72615	5.11085	7.8686
317.5	1.66736	5.00093	7.83846
317.75	1.60832	4.87862	7.80001
318	1.55216	4.75982	7.76803
318.25	1.496	4.63598	7.73176
318.5	1.43976	4.51119	7.69597
318.75	1.38608	4.38247	7.6615
319	1.33121	4.25232	7.62232
319.25	1.28329	4.11984	7.58228
319.5	1.23337	3.98848	7.53922
319.75	1.18729	3.85249	7.50017
320	1.14593	3.71617	7.45415
320.25	1.09497	3.58706	7.40551
320.5	1.05105	3.45746	7.35924
320.75	1.00506	3.3197	7.30942
321	0.961137	3.18739	7.26283
321.25	0.918659	3.05379	7.2161
321.5	0.86746	2.92628	7.1613
321.75	0.821141	2.79604	7.10957
322	0.771223	2.67372	7.05333
322.25	0.722264	2.55749	6.99588
322.5	0.672426	2.44485	6.94177
322.75	0.614987	2.33717	6.88479
323	0.556349	2.23358	6.82814
323.25	0.499952	2.13102	6.77377
323.5	0.442433	2.04742	6.71862
323.75	0.379635	1.96118	6.66403
324	0.320116	1.88111	6.60906
324.25	0.263478	1.81511	6.55692
324.5	0.20108	1.74751	6.50986
324.75	0.138761	1.68975	6.46207
325	0.087403	1.63487	6.41158
325.25	0.0311645	1.5824	6.36443
325.5	-0.0200325	1.54368	6.32657
325.75	-0.0701111	1.50488	6.28588
326	-0.11883	1.46992	6.24929
326.25	-0.163868	1.4412	6.2171
326.5	-0.203867	1.41504	6.18541
326.75	-0.240106	1.3916	6.16099
327	-0.276265	1.37256	6.13746
327.25	-0.303864	1.34872	6.1196
327.5	-0.330023	1.32616	6.10654
327.75	-0.353543	1.30992	6.09315
328	-0.372342	1.28881	6.08231
328.25	-0.390181	1.26241	6.07021
328.5	-0.408661	1.23761	6.06263
328.75	-0.417461	1.20737	6.05079
329	-0.427541	1.17625	6.05008
329.25	-0.437381	1.14497	6.0421
329.5	-0.444741	1.11097	6.03661
329.75	-0.447541	1.06633	6.03194
330	-0.451221	1.03009	6.03045
330.25	-0.447461	0.986095	6.02146
330.5	-0.448741	0.933776	6.02202
330.75	-0.453619	0.878578	6.0206
331	-0.452659	0.81594	6.02018
331.25	-0.453539	0.753862	6.01663
331.5	-0.452179	0.683624	6.01464
331.75	-0.45098	0.611066	6.01756
332	-0.45482	0.532349	6.01362
332.25	-0.45994	0.450031	6.0162
332.5	-0.46106	0.362354	6.0085
332.75	-0.4625	0.268757	6.00626
333	-0.46242	0.182599	5.9965
333.25	-0.46506	0.084842	5.98928
333.5	-0.46738	-0.00987512	5.97608
333.75	-0.47218	-0.107072	5.96273
334	-0.481299	-0.205869	5.94433
334.25	-0.481059	-0.306026	5.91567
334.5	-0.488579	-0.404823	5.89094
334.75	-0.491139	-0.50594	5.8622
335	-0.504898	-0.610977	5.82348
335.25	-0.502259	-0.708254	5.78644
335.5	-0.514978	-0.80953	5.73344
335.75	-0.524818	-0.909528	5.69129
336	-0.533698	-1.00448	5.63667
336.25	-0.548737	-1.09816	5.58414
336.5	-0.556417	-1.19336	5.52645
336.75	-0.571296	-1.28576	5.46666
337	-0.583616	-1.37671	5.41261
337.25	-0.605935	-1.46191	5.35114
337.5	-0.622575	-1.55167	5.28834
337.75	-0.642494	-1.64167	5.2274
338	-0.667294	-1.71798	5.16629
338.25	-0.692253	-1.79782	5.0997
338.5	-0.721052	-1.87774	5.03959
338.75	-0.749851	-1.95414	4.97714
339	-0.78001	-2.02797	4.91159
339.25	-0.808569	-2.09789	4.84879
339.5	-0.844888	-2.16789	4.78235
339.75	-0.878487	-2.23661	4.72451
340	-0.914646	-2.29781	4.66841
340.25	-0.947365	-2.3578	4.6028
340.5	-0.981204	-2.4154	4.54437
340.75	-1.01488	-2.47148	4.48968
341	-1.04864	-2.53036	4.43125
341.25	-1.07872	-2.57924	4.37663
341.5	-1.10248	-2.62956	4.32397
341.75	-1.13352	-2.67155	4.26855
342	-1.15976	-2.71683	4.22009
342.25	-1.18	-2.76323	4.17667
342.5	-1.2048	-2.79547	4.12603
342.75	-1.22232	-2.83539	4.08846
343	-1.23984	-2.86683	4.04731
343.25	-1.2476	-2.89667	4.01307
343.5	-1.2664	-2.92787	3.98258
343.75	-1.27471	-2.95395	3.95416
344	-1.28471	-2.98178	3.92826
344.25	-1.28751	-3.00314	3.90445
344.5	-1.29623	-3.02922	3.87906
344.75	-1.29751	-3.05178	3.86593
345	-1.29991	-3.06674	3.85255
345.25	-1.29847	-3.08786	3.84365
345.5	-1.29367	-3.10698	3.83433
345.75	-1.29519	-3.11818	3.82884
346	-1.28735	-3.1317	3.82629
346.25	-1.28247	-3.1493	3.82801
346.5	-1.27983	-3.1605	3.83348
346.75	-1.28103	-3.1793	3.83909
347	-1.27855	-3.18786	3.8486
347.25	-1.27983	-3.20178	3.86101
347.5	-1.28864	-3.2205	3.87141
347.75	-1.29735	-3.23162	3.89287
348	-1.30863	-3.24298	3.90324
348.25	-1.31871	-3.25786	3.91855
348.5	-1.34375	-3.27274	3.93426
348.75	-1.35999	-3.28665	3.95195
349	-1.38991	-3.30153	3.96703
349.25	-1.41863	-3.31921	3.98184
349.5	-1.45103	-3.32937	3.98757
349.75	-1.49111	-3.34529	3.99278
350	-1.53231	-3.35401	3.99848
350.25	-1.57959	-3.36649	3.99534
350.5	-1.62366	-3.37937	3.99019
350.75	-1.67598	-3.39049	3.97663
351	-1.72102	-3.40057	3.96693
351.25	-1.77102	-3.40689	3.94539
351.5	-1.81966	-3.42537	3.91946
351.75	-1.86998	-3.43153	3.88596
352	-1.91126	-3.44281	3.84628
352.25	-1.96125	-3.45033	3.81002
352.5	-2.00509	-3.46545	3.76396
352.75	-2.04765	-3.47665	3.70948
353	-2.07853	-3.48681	3.65905
353.25	-2.11525	-3.49921	3.60294
353.5	-2.14997	-3.50913	3.54034
353.75	-2.17997	-3.51793	3.48338
354	-2.21245	-3.53537	3.41675
354.25	-2.24476	-3.54409	3.34882
354.5	-2.27124	-3.56521	3.2866
354.75	-2.30372	-3.58401	3.21742
355	-2.34092	-3.60401	3.15315
355.25	-2.36868	-3.62904	3.08083
355.5	-2.40492	-3.65048	3.01373
355.75	-2.44756	-3.67912	2.94704
356	-2.48372	-3.70504	2.8801
356.25	-2.52372	-3.73672	2.81537
356.5	-2.5626	-3.76792	2.74798
356.75	-2.61043	-3.79664	2.69196
357	-2.65755	-3.82512	2.62918
357.25	-2.70363	-3.86416	2.57132
357.5	-2.75883	-3.89816	2.51798
357.75	-2.80995	-3.93296	2.4629
358	-2.86779	-3.96535	2.41602
358.25	-2.92242	-3.99903	2.36683
358.5	-2.98242	-4.03407	2.32042
358.75	-3.0409	-4.06551	2.28129
359	-3.10106	-4.10151	2.24194
359.25	-3.16362	-4.13167	2.20908
359.5	-3.22378	-4.16439	2.17025
359.75	-3.28241	-4.19655	2.13278
360	-3.34233	-4.22671	2.10707
360.25	-3.39865	-4.26039	2.08204
360.5	-3.45489	-4.29182	2.05435
360.75	-3.50481	-4.32798	2.03128
361	-3.55849	-4.35654	2.00923
361.25	-3.60736	-4.38782	1.98472
361.5	-3.64848	-4.42758	1.96125
361.75	-3.68592	-4.45654	1.93427
362	-3.71376	-4.4991	1.90934
362.25	-3.74376	-4.5339	1.8817
362.5	-3.76624	-4.56782	1.85263
362.75	-3.78	-4.60285	1.81338
363	-3.79232	-4.63541	1.78064
363.25	-3.8	-4.66549	1.73988
363.5	-3.79984	-4.70149	1.70548
363.75	-3.79752	-4.72533	1.66126
364	-3.79256	-4.75293	1.61751
364.25	-3.77608	-4.78149	1.57174
364.5	-3.76632	-4.80509	1.52945
364.75	-3.7512	-4.82653	1.4792
365	-3.7348	-4.84549	1.43237
365.25	-3.72096	-4.86253	1.38254
365.5	-3.70256	-4.88269	1.32538
365.75	-3.68136	-4.89749	1.27384
366	-3.6664	-4.91021	1.21834
366.25	-3.64864	-4.92141	1.16134
366.5	-3.64016	-4.92908	1.10124
366.75	-3.62	-4.93764	1.04534
367	-3.60872	-4.945	0.990381
367.25	-3.59864	-4.949	0.930782
367.5	-3.59008	-4.95772	0.877904
367.75	-3.57992	-4.96652	0.81893
368	-3.5688	-4.96764	0.756404
368.25	-3.56385	-4.97012	0.701638
368.5	-3.55857	-4.9726	0.639447
368.75	-3.55497	-4.97508	0.580569
369	-3.54873	-4.97876	0.520507
369.25	-3.54265	-4.97892	0.460365
369.5	-3.53993	-4.97756	0.394927
369.75	-3.53241	-4.97876	0.337777
370	-3.52761	-4.9738	0.276499
370.25	-3.51729	-4.9738	0.215684
370.5	-3.51257	-4.97252	0.151558
370.75	-3.49993	-4.97404	0.0853043
371	-3.49257	-4.97756	0.0256743
371.25	-3.47769	-4.97644	-0.0410118
371.5	-3.46249	-4.98236	-0.104098
371.75	-3.44881	-4.9826	-0.164784
372	-3.42609	-4.99268	-0.234142
372.25	-3.40841	-4.995	-0.297484
372.5	-3.38617	-5.00252	-0.36697
372.75	-3.36497	-5.00996	-0.436792
373	-3.33881	-5.01492	-0.50895
373.25	-3.31233	-5.02756	-0.573796
373.5	-3.28257	-5.03756	-0.645409
373.75	-3.24993	-5.04612	-0.710143
374	-3.2125	-5.05876	-0.779021
374.25	-3.17618	-5.0726	-0.848635
[truncated: 562 more rows]

## Sheet: Sheet3
Time (ms)	ERP data in four conditions
	SL	CL	TS	IES
-125	-0.640435	-0.942835	0.508632	0.482475
-124.75	-0.663439	-0.952542	0.509438	0.481392
-124.5	-0.680093	-0.958856	0.511417	0.482065
-124.25	-0.69787	-0.965745	0.515873	0.481811
-124	-0.710406	-0.974785	0.517177	0.48262
-123.75	-0.722957	-0.985695	0.518777	0.484212
-123.5	-0.733403	-0.992825	0.521918	0.483999
-123.25	-0.740336	-0.997717	0.524904	0.485414
-123	-0.742832	-1.00498	0.525046	0.483562
-122.75	-0.744944	-1.01166	0.525888	0.480349
-122.5	-0.746231	-1.01576	0.528436	0.478271
-122.25	-0.741339	-1.01815	0.528424	0.472613
-122	-0.736262	-1.01993	0.524371	0.465052
-121.75	-0.730104	-1.0239	0.523743	0.456416
-121.5	-0.72172	-1.02463	0.520353	0.443416
-121.25	-0.711921	-1.0269	0.516146	0.431003
-121	-0.698389	-1.02783	0.511322	0.415882
-120.75	-0.688924	-1.02841	0.50497	0.396561
-120.5	-0.674375	-1.02479	0.496686	0.378233
-120.25	-0.658668	-1.02217	0.486944	0.357114
-120	-0.639049	-1.02056	0.480319	0.332736
-119.75	-0.624884	-1.01606	0.468764	0.310457
-119.5	-0.606758	-1.0126	0.46029	0.284596
-119.25	-0.587153	-1.00403	0.4496	0.259517
-119	-0.569853	-0.99512	0.439396	0.23184
-118.75	-0.549679	-0.986158	0.425731	0.204012
-118.5	-0.526476	-0.974562	0.415266	0.177065
-118.25	-0.506288	-0.961864	0.402692	0.148202
-118	-0.481599	-0.949392	0.390864	0.120818
-117.75	-0.460743	-0.934054	0.378763	0.0910372
-117.5	-0.43567	-0.919675	0.366082	0.0637766
-117.25	-0.410334	-0.904373	0.353792	0.0358114
-117	-0.380774	-0.89025	0.340862	0.00869733
-116.75	-0.357073	-0.867482	0.327399	-0.0179836
-116.5	-0.331083	-0.853926	0.314398	-0.0450503
-116.25	-0.304403	-0.834122	0.299892	-0.0711126
-116	-0.279891	-0.819419	0.285872	-0.097992
-115.75	-0.250787	-0.802981	0.269588	-0.122078
-115.5	-0.225621	-0.787195	0.253149	-0.148091
-115.25	-0.200563	-0.771823	0.234815	-0.171791
-115	-0.175411	-0.757609	0.218176	-0.190942
-114.75	-0.153844	-0.74666	0.200008	-0.211721
-114.5	-0.133364	-0.737203	0.182432	-0.231015
-114.25	-0.115025	-0.727357	0.164204	-0.246161
-114	-0.0962953	-0.720549	0.143097	-0.261189
-113.75	-0.0825571	-0.712874	0.124087	-0.273947
-113.5	-0.067802	-0.709394	0.101439	-0.284792
-113.25	-0.0528975	-0.701947	0.0809474	-0.2928
-113	-0.039906	-0.700797	0.0589866	-0.299755
-112.75	-0.0311596	-0.698851	0.0377368	-0.30355
-112.5	-0.0220007	-0.691404	0.0155982	-0.304395
-112.25	-0.0161555	-0.690752	-0.00917136	-0.307803
-112	-0.00664822	-0.686952	-0.0313692	-0.305348
-111.75	0.00167842	-0.687194	-0.0536263	-0.301204
-111.5	0.00834135	-0.682039	-0.0748168	-0.297978
-111.25	0.0173935	-0.680318	-0.0980338	-0.291239
-111	0.0235659	-0.67183	-0.120741	-0.283596
-110.75	0.030556	-0.669261	-0.141209	-0.277038
-110.5	0.040824	-0.663268	-0.16343	-0.267607
-110.25	0.0492717	-0.655235	-0.183862	-0.260314
-110	0.0602224	-0.644623	-0.202671	-0.25088
-109.75	0.0728373	-0.637684	-0.220116	-0.240338
-109.5	0.0870592	-0.62715	-0.236116	-0.232628
-109.25	0.0982233	-0.614199	-0.250965	-0.225919
-109	0.109807	-0.598251	-0.265282	-0.218636
-108.75	0.126112	-0.581401	-0.275557	-0.212344
-108.5	0.138279	-0.567835	-0.287231	-0.207211
-108.25	0.154868	-0.547814	-0.294615	-0.203188
-108	0.169581	-0.526836	-0.299782	-0.202258
-107.75	0.182907	-0.501718	-0.303385	-0.20214
-107.5	0.198117	-0.477812	-0.305162	-0.201458
-107.25	0.211258	-0.454007	-0.304878	-0.205011
-107	0.223638	-0.421254	-0.301962	-0.207984
-106.75	0.234567	-0.387377	-0.299213	-0.212972
-106.5	0.245305	-0.356886	-0.294603	-0.219511
-106.25	0.254521	-0.323654	-0.290431	-0.227492
-106	0.259271	-0.284919	-0.284007	-0.235663
-105.75	0.268287	-0.248834	-0.280547	-0.245373
-105.5	0.273962	-0.212746	-0.272891	-0.25665
-105.25	0.280162	-0.17123	-0.267154	-0.266509
-105	0.279807	-0.12898	-0.262592	-0.278257
-104.75	0.284472	-0.0877032	-0.258302	-0.293647
-104.5	0.280895	-0.0399703	-0.253845	-0.307745
-104.25	0.281307	0.00359346	-0.248986	-0.321244
-104	0.280952	0.0480507	-0.245869	-0.335978
-103.75	0.278755	0.0957316	-0.241188	-0.351942
-103.5	0.278036	0.14697	-0.239541	-0.366191
-103.25	0.277304	0.194514	-0.235677	-0.383189
-103	0.280788	0.247876	-0.232856	-0.397691
-102.75	0.278584	0.296951	-0.227499	-0.412077
-102.5	0.280319	0.349718	-0.224809	-0.427968
-102.25	0.282609	0.401733	-0.220673	-0.441942
-102	0.283611	0.451988	-0.216004	-0.455165
-101.75	0.284955	0.505881	-0.213064	-0.472754
-101.5	0.283163	0.554852	-0.209011	-0.486771
-101.25	0.285097	0.600374	-0.205053	-0.50006
-101	0.283369	0.645762	-0.199163	-0.515452
-100.75	0.282402	0.685002	-0.195975	-0.528015
-100.5	0.284102	0.724619	-0.191163	-0.539671
-100.25	0.280589	0.75806	-0.189278	-0.550813
-100	0.283057	0.787136	-0.188141	-0.559256
-99.75	0.279729	0.819957	-0.185427	-0.56546
-99.5	0.283526	0.843139	-0.184573	-0.568815
-99.25	0.282516	0.862656	-0.18436	-0.570603
-99	0.28775	0.881372	-0.182807	-0.571067
-98.75	0.287778	0.893837	-0.181314	-0.570018
-98.5	0.292635	0.904971	-0.178814	-0.565716
-98.25	0.298715	0.91324	-0.178091	-0.561486
-98	0.302135	0.919356	-0.176834	-0.554766
-97.75	0.307689	0.921807	-0.176348	-0.547612
-97.5	0.314458	0.918297	-0.17354	-0.540014
-97.25	0.32083	0.915948	-0.172971	-0.532919
-97	0.330877	0.910218	-0.171205	-0.524003
-96.75	0.338258	0.901512	-0.168337	-0.51733
-96.5	0.349842	0.895112	-0.166239	-0.510267
-96.25	0.362827	0.884807	-0.161214	-0.503084
-96	0.375875	0.87049	-0.160041	-0.497148
-95.75	0.390204	0.856737	-0.156948	-0.493318
-95.5	0.408806	0.840982	-0.153463	-0.488086
-95.25	0.424947	0.824298	-0.151839	-0.487649
-95	0.4402	0.812422	-0.147407	-0.486265
-94.75	0.454202	0.79159	-0.142998	-0.484196
-94.5	0.465344	0.772163	-0.137393	-0.489189
-94.25	0.481636	0.755369	-0.129772	-0.491493
-94	0.497571	0.735591	-0.123681	-0.496856
-93.75	0.508031	0.718646	-0.11523	-0.503034
-93.5	0.519728	0.701134	-0.106188	-0.509981
-93.25	0.531341	0.685746	-0.0925821	-0.519266
-93	0.542064	0.671646	-0.0806003	-0.530311
-92.75	0.550348	0.657848	-0.0635933	-0.540409
-92.5	0.558405	0.647788	-0.046859	-0.55353
-92.25	0.566895	0.643136	-0.0244479	-0.564903
-92	0.574689	0.634162	-0.0020367	-0.576662
-91.75	0.576168	0.630848	0.0237402	-0.590244
-91.5	0.579993	0.6293	0.0508684	-0.599336
-91.25	0.583335	0.628565	0.0832466	-0.609353
-91	0.583791	0.629566	0.115068	-0.620315
-90.75	0.584018	0.629234	0.148951	-0.627481
-90.5	0.583542	0.628587	0.183439	-0.636716
-90.25	0.584075	0.632687	0.221874	-0.643769
-90	0.582326	0.636712	0.257854	-0.651777
-89.75	0.580655	0.640433	0.294867	-0.658007
-89.5	0.58426	0.642645	0.330635	-0.664458
-89.25	0.582959	0.64662	0.365265	-0.667743
-89	0.584744	0.644126	0.398081	-0.671324
-88.75	0.580719	0.649538	0.430626	-0.673541
-88.5	0.57636	0.649467	0.461274	-0.674289
-88.25	0.575969	0.647167	0.489006	-0.677489
-88	0.569434	0.646848	0.512828	-0.67674
-87.75	0.565196	0.647288	0.533876	-0.676898
-87.5	0.55704	0.6416	0.552103	-0.675818
-87.25	0.55032	0.639872	0.568932	-0.670494
-87	0.5405	0.635764	0.58031	-0.667591
-86.75	0.529634	0.633524	0.591237	-0.662282
-86.5	0.525509	0.632505	0.600114	-0.654081
-86.25	0.512952	0.626852	0.605352	-0.645629
-86	0.503715	0.626496	0.608291	-0.634329
-85.75	0.494087	0.620767	0.60758	-0.624275
-85.5	0.486549	0.621715	0.605696	-0.611694
-85.25	0.478876	0.618989	0.603894	-0.597649
-85	0.470208	0.616059	0.598988	-0.582918
-84.75	0.462593	0.616686	0.594425	-0.563917
-84.5	0.456776	0.612985	0.587279	-0.546388
-84.25	0.453462	0.612635	0.578473	-0.525604
-84	0.454458	0.611492	0.567226	-0.503937
-83.75	0.457601	0.608302	0.558705	-0.480386
-83.5	0.462479	0.612307	0.545751	-0.457493
-83.25	0.469142	0.616029	0.534279	-0.432415
-83	0.481437	0.619423	0.520863	-0.406902
-82.75	0.496576	0.625372	0.506629	-0.382364
-82.5	0.5197	0.630585	0.492953	-0.354061
-82.25	0.540151	0.638466	0.478316	-0.329543
-82	0.572996	0.6432	0.465173	-0.30552
-81.75	0.60385	0.656336	0.447976	-0.281505
-81.5	0.64247	0.661977	0.433683	-0.259557
-81.25	0.679332	0.673957	0.418774	-0.237961
-81	0.723705	0.686495	0.403711	-0.216949
-80.75	0.770032	0.699738	0.38905	-0.199513
-80.5	0.816502	0.711087	0.374473	-0.185697
-80.25	0.871391	0.727653	0.359244	-0.170719
-80	0.923521	0.743876	0.344465	-0.159812
-79.75	0.978552	0.757578	0.33182	-0.149745
-79.5	1.03599	0.774149	0.318546	-0.140332
-79.25	1.09435	0.78917	0.306292	-0.132861
-79	1.15019	0.804034	0.292793	-0.129293
-78.75	1.2118	0.822304	0.283181	-0.126336
-78.5	1.27173	0.839674	0.270785	-0.123833
-78.25	1.32528	0.851634	0.261066	-0.124439
-78	1.38141	0.868783	0.251692	-0.129149
-77.75	1.43366	0.884645	0.243455	-0.131658
-77.5	1.48375	0.899983	0.234732	-0.136823
-77.25	1.53139	0.912548	0.224445	-0.143801
-77	1.57805	0.918218	0.213708	-0.150854
-76.75	1.62281	0.926154	0.205803	-0.16087
-76.5	1.66073	0.934919	0.193999	-0.1739
-76.25	1.69544	0.937019	0.182953	-0.18423
-76	1.73088	0.943772	0.170723	-0.195006
-75.75	1.76302	0.937998	0.155149	-0.206291
-75.5	1.79432	0.934087	0.140738	-0.221347
-75.25	1.81939	0.924964	0.125307	-0.235022
-75	1.84823	0.917234	0.106013	-0.251093
-74.75	1.87006	0.903238	0.086968	-0.264114
-74.5	1.89279	0.892529	0.0692856	-0.280812
-74.25	1.91412	0.872893	0.0483084	-0.295082
-74	1.93246	0.852452	0.0278646	-0.311177
-73.75	1.94859	0.830501	0.00654379	-0.32448
-73.5	1.96881	0.80775	-0.0134378	-0.33658
-73.25	1.98314	0.782784	-0.0330284	-0.352053
-73	1.99751	0.757246	-0.0541597	-0.363115
-72.75	2.0072	0.729877	-0.0714273	-0.37518
-72.5	2.02067	0.7024	-0.0893703	-0.384129
-72.25	2.02801	0.671721	-0.103047	-0.392979
-72	2.03391	0.647464	-0.114993	-0.400106
-71.75	2.03528	0.620298	-0.126703	-0.406304
-71.5	2.03729	0.591473	-0.135745	-0.412431
-71.25	2.03414	0.5657	-0.142619	-0.418013
-71	2.0289	0.536242	-0.14531	-0.419536
-70.75	2.01339	0.513895	-0.14685	-0.422341
-70.5	2.0013	0.491472	-0.147052	-0.424821
-70.25	1.98641	0.471602	-0.145558	-0.423868
-70	1.9667	0.450497	-0.140367	-0.425374
-69.75	1.94122	0.430508	-0.133814	-0.422277
-69.5	1.91542	0.412439	-0.125529	-0.419069
-69.25	1.88563	0.395122	-0.118051	-0.415679
-69	1.85304	0.378781	-0.108013	-0.409058
-68.75	1.82092	0.365842	-0.0961376	-0.402731
-68.5	1.78061	0.349211	-0.0833735	-0.391937
-68.25	1.74106	0.336075	-0.0703962	-0.380725
-68	1.69472	0.324368	-0.0570632	-0.367056
-67.75	1.65396	0.312555	-0.0435406	-0.35246
-67.5	1.60593	0.299433	-0.0292359	-0.335552
-67.25	1.55498	0.286979	-0.0151445	-0.316614
-67	1.50445	0.276925	-0.00251088	-0.294687
-66.75	1.45406	0.270105	0.0110592	-0.273927
-66.5	1.39942	0.25956	0.0240247	-0.249078
-66.25	1.3449	0.253698	0.035497	-0.222768
-66	1.29461	0.246288	0.0459024	-0.196215
-65.75	1.24325	0.246153	0.0557156	-0.166336
-65.5	1.18748	0.246696	0.0643435	-0.137011
-65.25	1.13291	0.244169	0.0695699	-0.107386
-65	1.08051	0.253214	0.0753179	-0.0774392
-64.75	1.02627	0.252093	0.0767164	-0.0446646
-64.5	0.973645	0.259451	0.0790275	-0.0123907
-64.25	0.922546	0.268619	0.0807935	0.0197332
-64	0.868582	0.277899	0.0794303	0.0529713
-63.75	0.818528	0.286593	0.0762186	0.0839725
-63.5	0.770288	0.302232	0.0740735	0.117577
-63.25	0.723925	0.311017	0.0688233	0.147786
-63	0.678252	0.322851	0.0654693	0.177019
-62.75	0.630587	0.334876	0.0594369	0.205272
-62.5	0.588114	0.346969	0.0531912	0.233793
-62.25	0.54488	0.357022	0.0503705	0.261327
-62	0.50321	0.365917	0.0405458	0.285846
-61.75	0.464448	0.376024	0.0367294	0.309513
-61.5	0.424151	0.381222	0.0312896	0.334639
-61.25	0.381422	0.386397	0.0263357	0.355724
-61	0.339162	0.386449	0.022638	0.3752
-60.75	0.299177	0.38546	0.0178619	0.396391
-60.5	0.256981	0.389063	0.0151598	0.414425
-60.25	0.2162	0.380784	0.0128607	0.429204
-60	0.175711	0.378579	0.0107748	0.44346
-59.75	0.1335	0.370969	0.00930516	0.456864
-59.5	0.0913753	0.362201	0.0107628	0.466063
-59.25	0.0525428	0.346175	0.0111184	0.474021
-59	0.0111644	0.336056	0.00935259	0.482182
-58.75	-0.0286351	0.32535	0.0118771	0.488294
-58.5	-0.0634216	0.308902	0.0128013	0.490427
-58.25	-0.102069	0.291997	0.015219	0.492586
-58	-0.135462	0.274542	0.018336	0.494458
-57.75	-0.17069	0.251325	0.0183716	0.491864
-57.5	-0.206109	0.228961	0.021844	0.49322
-57.25	-0.236473	0.211289	0.0233491	0.489893
-57	-0.26968	0.182537	0.0270468	0.484289
-56.75	-0.297597	0.158542	0.0264779	0.479489
-56.5	-0.324107	0.135164	0.0276749	0.473926
-56.25	-0.35472	0.108768	0.0279831	0.466137
-56	-0.380916	0.0798887	0.029429	0.458056
-55.75	-0.408336	0.0546711	0.0293934	0.449476
-55.5	-0.433224	0.0326059	0.0278764	0.439775
-55.25	-0.459506	0.00396085	0.0264188	0.428832
-55	-0.486264	-0.0177697	0.0261105	0.416954
-54.75	-0.509452	-0.0363506	0.0231594	0.402301
-54.5	-0.5355	-0.0588874	0.0223537	0.392532
-54.25	-0.563908	-0.0781911	0.0203745	0.378468
-54	-0.587644	-0.0908984	0.0185968	0.362907
-53.75	-0.610577	-0.106426	0.0177434	0.348439
-53.5	-0.63331	-0.117877	0.0155273	0.333885
-53.25	-0.651457	-0.125303	0.0137851	0.31743
-53	-0.674823	-0.130217	0.0106444	0.300594
-52.75	-0.692274	-0.131803	0.00726676	0.282637
-52.5	-0.709048	-0.129783	0.00258528	0.264934
-52.25	-0.727679	-0.130397	-0.00280703	0.247586
-52	-0.740926	-0.120117	-0.00885121	0.231498
-51.75	-0.756883	-0.108379	-0.0170763	0.21331
-51.5	-0.76809	-0.0977389	-0.0246612	0.195662
-51.25	-0.779851	-0.0838301	-0.0333485	0.176426
-51	-0.792637	-0.0684019	-0.0446901	0.160137
-50.75	-0.801653	-0.0511414	-0.0562217	0.14358
-50.5	-0.807783	-0.0318731	-0.0651222	0.127264
-50.25	-0.811502	-0.010588	-0.07599	0.111838
-50	-0.81729	0.00976584	-0.0876518	0.0940507
-49.75	-0.818705	0.0319921	-0.098745	0.0782418
-49.5	-0.821934	0.0492597	-0.110964	0.0635321
-49.25	-0.821855	0.0790187	-0.12144	0.0475466
-49	-0.820597	0.101845	-0.131491	0.0340218
-48.75	-0.815278	0.128717	-0.140391	0.0197354
-48.5	-0.810549	0.150476	-0.151342	0.00571175
-48.25	-0.805472	0.172904	-0.159531	-0.00871246
-48	-0.79851	0.195659	-0.165421	-0.0210574
-47.75	-0.787474	0.217039	-0.172757	-0.0353644
-47.5	-0.780072	0.238635	-0.178008	-0.0480734
-47.25	-0.768147	0.255743	-0.181089	-0.0618169
-47	-0.758846	0.273452	-0.182393	-0.0753631
-46.75	-0.745193	0.288577	-0.181919	-0.0871069
-46.5	-0.732159	0.298947	-0.179667	-0.0992675
-46.25	-0.716209	0.311092	-0.176645	-0.109696
-46	-0.702115	0.312	-0.171679	-0.119766
-45.75	-0.691221	0.316314	-0.164805	-0.129036
-45.5	-0.673266	0.316056	-0.15581	-0.136878
-45.25	-0.660004	0.313993	-0.14621	-0.145472
-45	-0.65017	0.3078	-0.136267	-0.14973
-44.75	-0.64195	0.292137	-0.123183	-0.15378
-44.5	-0.630715	0.276811	-0.107965	-0.156981
-44.25	-0.623654	0.254402	-0.0920489	-0.161228
-44	-0.620859	0.229594	-0.0760968	-0.16107
-43.75	-0.619444	0.198202	-0.0558426	-0.158498
-43.5	-0.624002	0.164053	-0.0380177	-0.157256
-43.25	-0.624023	0.124754	-0.0167562	-0.150988
-43	-0.629748	0.0804836	0.00303567	-0.145817
-42.75	-0.637797	0.0330683	0.0248187	-0.138677
-42.5	-0.646579	-0.0186682	0.048024	-0.128174
-42.25	-0.658376	-0.0756715	0.0727937	-0.115567
-42	-0.673231	-0.138039	0.0974329	-0.104141
-41.75	-0.688107	-0.203416	0.124561	-0.0890797
-41.5	-0.703132	-0.270778	0.150907	-0.0731125
-41.25	-0.719458	-0.340351	0.177371	-0.0564406
-41	-0.734882	-0.413939	0.204961	-0.0382346
-40.75	-0.750626	-0.487919	0.234412	-0.0201318
-40.5	-0.759294	-0.564948	0.261138	-0.00138412
-40.25	-0.775258	-0.643813	0.288277	0.0188002
-40	-0.788	-0.720006	0.314173	0.0366797
-39.75	-0.797365	-0.794552	0.341265	0.0556766
-39.5	-0.804583	-0.873959	0.365431	0.0736391
-39.25	-0.812746	-0.948953	0.389453	0.0910814
-39	-0.818506	-1.02219	0.410893	0.108085
-38.75	-0.819914	-1.09404	0.432071	0.125474
-38.5	-0.825034	-1.16579	0.44813	0.141797
-38.25	-0.828838	-1.23144	0.462921	0.157144
-38	-0.829109	-1.29282	0.476088	0.169412
-37.75	-0.826705	-1.35491	0.486055	0.18363
-37.5	-0.82908	-1.41221	0.492597	0.195118
-37.25	-0.828049	-1.46616	0.497492	0.209199
-37	-0.824572	-1.51717	0.496935	0.217725
-36.75	-0.818933	-1.56082	0.49697	0.228872
-36.5	-0.810158	-1.60446	0.492846	0.23792
-36.25	-0.801511	-1.64254	0.485723	0.245306
-36	-0.793184	-1.67291	0.474998	0.256292
-35.75	-0.781857	-1.70213	0.461665	0.260268
-35.5	-0.767706	-1.72944	0.447538	0.266562
-35.25	-0.753683	-1.74824	0.430531	0.271336
-35	-0.736909	-1.76152	0.411687	0.274402
-34.75	-0.723255	-1.77214	0.390852	0.276239
-34.5	-0.710406	-1.77574	0.366983	0.277275
-34.25	-0.690112	-1.77927	0.34341	0.277596
-34	-0.678663	-1.7791	0.31902	0.275097
-33.75	-0.66484	-1.77111	0.292639	0.271802
-33.5	-0.653476	-1.76004	0.266838	0.265989
-33.25	-0.644339	-1.75014	0.23984	0.259955
-33	-0.637563	-1.73142	0.207901	0.25253
-32.75	-0.629491	-1.71236	0.182349	0.244436
-32.5	-0.622189	-1.68885	0.153514	0.235348
-32.25	-0.622637	-1.66657	0.12334	0.225531
-32	-0.621762	-1.63817	0.0944462	0.218426
-31.75	-0.623134	-1.60695	0.0680885	0.210016
-31.5	-0.629179	-1.57416	0.0407234	0.202885
-31.25	-0.630246	-1.54207	0.0138797	0.196519
-31	-0.635941	-1.50599	-0.00964535	0.19251
-30.75	-0.642604	-1.46763	-0.0333484	0.191796
-30.5	-0.647006	-1.42727	-0.0526546	0.191377
-30.25	-0.651194	-1.38587	-0.0723753	0.195904
-30	-0.659279	-1.3434	-0.0906978	0.200946
-29.75	-0.662856	-1.30003	-0.10742	0.210193
-29.5	-0.669441	-1.25538	-0.121263	0.221826
-29.25	-0.673671	-1.20942	-0.132759	0.237364
-29	-0.680683	-1.16241	-0.142524	0.25287
-28.75	-0.682838	-1.11301	-0.152835	0.271275
-28.5	-0.689756	-1.06482	-0.159508	0.288997
-28.25	-0.693582	-1.0138	-0.165753	0.309944
-28	-0.701305	-0.966169	-0.172189	0.332654
-27.75	-0.705578	-0.916449	-0.177071	0.355278
-27.5	-0.707782	-0.866543	-0.183625	0.376727
-27.25	-0.717752	-0.814785	-0.190985	0.39705
-27	-0.722417	-0.764957	-0.196295	0.419023
-26.75	-0.728788	-0.717797	-0.205408	0.438723
-26.5	-0.735309	-0.668836	-0.213562	0.454948
-26.25	-0.744055	-0.621385	-0.224252	0.474723
-26	-0.746835	-0.573451	-0.236258	0.489465
-25.75	-0.755056	-0.532786	-0.250017	0.503998
-25.5	-0.758526	-0.487148	-0.265602	0.516993
-25.25	-0.766156	-0.446519	-0.280215	0.527911
-25	-0.769662	-0.406319	-0.299379	0.53796
-24.75	-0.772236	-0.367623	-0.31814	0.545401
-24.5	-0.775564	-0.32658	-0.338643	0.552366
-24.25	-0.776979	-0.288444	-0.35975	0.55712
-24	-0.774298	-0.254198	-0.381948	0.56006
-23.75	-0.776545	-0.216946	-0.402143	0.560615
-23.5	-0.773821	-0.183598	-0.423286	0.563187
-23.25	-0.770884	-0.149409	-0.446977	0.562406
-23	-0.766532	-0.115509	-0.468701	0.561048
-22.75	-0.76142	-0.0842662	-0.490057	0.556616
-22.5	-0.753256	-0.0534097	-0.511295	0.554393
-22.25	-0.750234	-0.021131	-0.531478	0.551878
-22	-0.741118	0.0123281	-0.548959	0.544025
-21.75	-0.733644	0.0445927	-0.568384	0.541
-21.5	-0.726199	0.0745509	-0.583009	0.534868
-21.25	-0.718641	0.105144	-0.597278	0.527661
-21	-0.709589	0.137535	-0.611132	0.52291
-20.75	-0.704141	0.166893	-0.624038	0.516945
-20.5	-0.693959	0.194412	-0.634835	0.511027
-20.25	-0.686386	0.224714	-0.645359	0.504219
-20	-0.679602	0.249659	-0.655765	0.498143
-19.75	-0.667961	0.274329	-0.664168	0.491125
-19.5	-0.659535	0.298352	-0.671172	0.484944
-19.25	-0.652189	0.321396	-0.678069	0.476758
-19	-0.638515	0.345289	-0.683794	0.468534
-18.75	-0.63321	0.368958	-0.691189	0.459292
-18.5	-0.622366	0.389421	-0.697861	0.450565
-18.25	-0.609182	0.409137	-0.700504	0.442679
-18	-0.597713	0.431757	-0.705932	0.434757
-17.75	-0.589144	0.447624	-0.709274	0.423191
-17.5	-0.575562	0.464207	-0.711823	0.415463
-17.25	-0.562557	0.486348	-0.712166	0.405064
-17	-0.544744	0.505701	-0.713517	0.397758
-16.75	-0.532101	0.517365	-0.711242	0.391218
-16.5	-0.515106	0.535026	-0.708184	0.381078
-16.25	-0.500144	0.546425	-0.706442	0.373193
-16	-0.482509	0.56186	-0.700884	0.365856
-15.75	-0.465222	0.573946	-0.693417	0.359119
-15.5	-0.445775	0.584589	-0.68614	0.35163
-15.25	-0.432989	0.595215	-0.676683	0.347159
-15	-0.411983	0.604585	-0.664523	0.340099
-14.75	-0.397811	0.612011	-0.650752	0.334131
-14.5	-0.380902	0.622237	-0.635416	0.327513
-14.25	-0.371082	0.625256	-0.618326	0.318138
-14	-0.357173	0.629549	-0.598024	0.310998
-13.75	-0.342375	0.630426	-0.578375	0.302184
-13.5	-0.331318	0.632059	-0.556153	0.294579
-13.25	-0.31898	0.630464	-0.531644	0.289832
-13	-0.313405	0.625735	-0.508214	0.280907
-12.75	-0.301302	0.622687	-0.483219	0.272551
-12.5	-0.298671	0.615797	-0.457596	0.266943
-12.25	-0.29363	0.607652	-0.432104	0.258752
-12	-0.296986	0.602236	-0.407275	0.254535
-11.75	-0.294703	0.594483	-0.38209	0.247983
-11.5	-0.300727	0.584148	-0.358601	0.242161
-11.25	-0.305619	0.57694	-0.33517	0.236867
-11	-0.313484	0.567096	-0.313897	0.233765
-10.75	-0.324569	0.556458	-0.292149	0.228605
-10.5	-0.334873	0.546397	-0.270224	0.226913
-10.25	-0.352344	0.534969	-0.252245	0.22618
-10	-0.368479	0.523929	-0.234196	0.223376
-9.75	-0.384955	0.507659	-0.217461	0.222208
-9.5	-0.399604	0.495115	-0.20158	0.22403
-9.25	-0.417957	0.479258	-0.188852	0.227196
-9	-0.438735	0.461874	-0.175471	0.229978
-8.75	-0.456512	0.445896	-0.164165	0.233935
-8.5	-0.478904	0.424727	-0.15312	0.239077
-8.25	-0.497635	0.403617	-0.143413	0.244802
-8	-0.511899	0.386169	-0.135579	0.250634
-7.75	-0.529427	0.363744	-0.125778	0.258081
-7.5	-0.545583	0.339595	-0.11894	0.263252
-7.25	-0.557437	0.318995	-0.113607	0.273553
-7	-0.565757	0.298361	-0.107266	0.278848
-6.75	-0.570926	0.278935	-0.101032	0.285591
-6.5	-0.57921	0.254193	-0.0931511	0.290902
-6.25	-0.580462	0.231538	-0.0867513	0.296097
-6	-0.577767	0.208309	-0.0810152	0.301259
-5.75	-0.576124	0.186043	-0.0719368	0.303101
-5.5	-0.569134	0.162603	-0.0628349	0.303713
-5.25	-0.55935	0.142204	-0.055499	0.303876
-5	-0.546735	0.11938	-0.0449629	0.300924
-4.75	-0.537534	0.0978719	-0.0336091	0.298009
-4.5	-0.519593	0.0720051	-0.0236184	0.29579
-4.25	-0.500173	0.0506609	-0.0136749	0.289552
-4	-0.481663	0.028875	-0.00187084	0.284706
-3.75	-0.456661	0.00666795	0.00979107	0.278211
-3.5	-0.430636	-0.0133491	0.0185256	0.271782
-3.25	-0.399632	-0.0333665	0.0293816	0.265234
-3	-0.366751	-0.0515822	0.0385783	0.258193
-2.75	-0.329582	-0.0712696	0.0472537	0.25162
-2.5	-0.295201	-0.087272	0.0559526	0.246059
-2.25	-0.252145	-0.102918	0.0609301	0.24083
-2	-0.205945	-0.110849	0.0661568	0.234096
-1.75	-0.160528	-0.11658	0.0732914	0.22725
-1.5	-0.113425	-0.119302	0.0769417	0.22595
-1.25	-0.05934	-0.117939	0.080094	0.219975
-1	-0.00634938	-0.108152	0.0835192	0.216964
-0.75	0.048902	-0.0953831	0.0834124	0.213855
-0.5	0.107396	-0.075693	0.0869086	0.212073
-0.25	0.165393	-0.0538222	0.086162	0.210431
0	0.223332	-0.0236839	0.0866479	0.209564
0.25	0.283177	0.00619609	0.0881887	0.209431
0.5	0.34468	0.043623	0.0875724	0.206084
0.75	0.409175	0.0854279	0.0872761	0.206052
1	0.475875	0.128769	0.0847517	0.20161
1.25	0.544446	0.172651	0.0837325	0.195851
1.5	0.611871	0.222443	0.0842659	0.184172
1.75	0.687418	0.268986	0.081694	0.158454
2	0.759394	0.317286	0.0795016	0.123832
2.25	0.831691	0.364723	0.0763608	0.0751206
2.5	0.90093	0.405563	0.0744291	0.0106217
2.75	0.970779	0.448928	0.0721535	-0.0636011
3	1.04244	0.490882	0.0707788	-0.147038
3.25	1.10688	0.52998	0.0680174	-0.238628
3.5	1.17026	0.570583	0.0654576	-0.338186
3.75	1.23004	0.605602	0.0624116	-0.439697
4	1.28822	0.639028	0.0601243	-0.543055
4.25	1.34086	0.670842	0.0597451	-0.643031
4.5	1.39275	0.700912	0.0551349	-0.742619
4.75	1.43954	0.725814	0.051366	-0.835717
5	1.4798	0.752333	0.0459499	-0.923616
5.25	1.52065	0.772206	0.039076	-1.0049
5.5	1.55576	0.790013	0.0336836	-1.07654
5.75	1.59027	0.809791	0.0273431	-1.13855
6	1.62139	0.826272	0.0194855	-1.18841
6.25	1.64506	0.838839	0.0104547	-1.23118
6.5	1.66813	0.84788	0.00352172	-1.26279
6.75	1.68722	0.857136	-0.00219081	-1.28314
7	1.69716	0.863286	-0.00990604	-1.29367
7.25	1.70843	0.865598	-0.0151445	-1.29866
7.5	1.71504	0.866079	-0.0211888	-1.30265
7.75	1.71631	0.865149	-0.0258463	-1.30427
8	1.71443	0.861973	-0.0291885	-1.30843
8.25	1.70784	0.856936	-0.0302671	-1.31491
8.5	1.6969	0.847296	-0.0331351	-1.32563
8.75	1.68112	0.839079	-0.0330046	-1.3401
9	1.66816	0.827132	-0.0320921	-1.35502
9.25	1.64676	0.81165	-0.0297455	-1.37153
9.5	1.62256	0.794605	-0.0275412	-1.38607
9.75	1.59948	0.775756	-0.0210347	-1.40016
10	1.56923	0.756256	-0.0154999	-1.41128
10.25	1.54431	0.734819	-0.00789141	-1.41748
10.5	1.51588	0.710217	0.00276311	-1.41678
10.75	1.48959	0.681907	0.0102178	-1.41143
11	1.46192	0.658343	0.0235743	-1.39897
11.25	1.43794	0.632344	0.0370019	-1.3797
11.5	1.41602	0.605379	0.0532386	-1.35367
11.75	1.39236	0.583975	0.0689655	-1.31857
12	1.37299	0.56059	0.0846925	-1.27751
12.25	1.36067	0.54319	0.103382	-1.23082
12.5	1.34751	0.52135	0.123684	-1.17476
12.75	1.33979	0.505869	0.143689	-1.11298
13	1.33154	0.490578	0.164868	-1.04922
13.25	1.33267	0.47804	0.186935	-0.981778
13.5	1.33435	0.469921	0.208541	-0.917389
13.75	1.33733	0.461331	0.228095	-0.857933
14	1.34501	0.457499	0.250779	-0.804623
14.25	1.36059	0.457584	0.271662	-0.763255
14.5	1.37574	0.459461	0.292971	-0.7292
14.75	1.39706	0.466947	0.310416	-0.702721
15	1.41965	0.480144	0.331381	-0.683014
15.25	1.44598	0.494053	0.348032	-0.668282
15.5	1.47832	0.509204	0.362029	-0.659777
15.75	1.51392	0.535375	0.377175	-0.651029
16	1.54966	0.55949	0.391136	-0.642914
16.25	1.5887	0.589024	0.406425	-0.636112
16.5	1.63277	0.624292	0.417897	-0.622802
16.75	1.68276	0.658474	0.429986	-0.611329
17	1.73194	0.696939	0.43981	-0.592039
17.25	1.78236	0.740815	0.448509	-0.569
17.5	1.83522	0.783936	0.460053	-0.541524
17.75	1.89712	0.827168	0.469878	-0.507583
18	1.94863	0.870684	0.475199	-0.47091
18.25	2.00357	0.91987	0.482025	-0.426893
18.5	2.06141	0.960137	0.48762	-0.378856
18.75	2.11565	1.01111	0.492004	-0.327637
19	2.16916	1.05838	0.494979	-0.271499
19.25	2.21806	1.10093	0.494801	-0.215765
19.5	2.26067	1.14498	0.496117	-0.154175
19.75	2.30575	1.18813	0.492277	-0.093218
20	2.34671	1.22796	0.485036	-0.0323628
20.25	2.38149	1.26461	0.480426	0.0292543
20.5	2.41653	1.29932	0.47309	0.092372
20.75	2.4405	1.32771	0.464473	0.153845
21	2.46394	1.35431	0.451532	0.214153
21.25	2.48656	1.38117	0.439408	0.274721
21.5	2.50088	1.39987	0.425221	0.332119
21.75	2.50887	1.41155	0.411486	0.389183
22	2.51925	1.42288	0.39609	0.442646
22.25	2.52382	1.42713	0.380577	0.493337
22.5	2.52493	1.429	0.362539	0.53999
22.75	2.52108	1.42441	0.345496	0.587378
23	2.51289	1.41189	0.327553	0.629603
23.25	2.50128	1.3914	0.307512	0.669121
23.5	2.48891	1.3694	0.28727	0.707937
23.75	2.47131	1.33756	0.265937	0.73888
24	2.45613	1.30436	0.24406	0.767718
24.25	2.43529	1.26796	0.223971	0.793903
24.5	2.42049	1.22056	0.200351	0.819082
24.75	2.3987	1.17323	0.178841	0.838014
25	2.37709	1.11664	0.154699	0.855488
25.25	2.35276	1.0591	0.130878	0.869963
25.5	2.33082	1.00175	0.106428	0.879297
25.75	2.30763	0.934485	0.0820852	0.888166
26	2.27807	0.867503	0.0567466	0.893771
26.25	2.25266	0.803218	0.0331741	0.89953
26.5	2.22698	0.734942	0.0101348	0.899399
26.75	2.19655	0.666151	-0.0161163	0.896037
27	2.16937	0.599695	-0.0422726	0.894366
27.25	2.14352	0.532687	-0.068014	0.888266
27.5	2.11118	0.467598	-0.0939451	0.883382
27.75	2.08612	0.403368	-0.119343	0.874984
28	2.05779	0.340581	-0.145535	0.867661
28.25	2.02754	0.285417	-0.172295	0.859838
28.5	2.00079	0.228122	-0.197906	0.85202
28.75	1.97387	0.17773	-0.221574	0.842964
29	1.94925	0.125714	-0.247433	0.833795
29.25	1.92205	0.0806828	-0.270201	0.823059
29.5	1.89973	0.0384536	-0.291498	0.81542
29.75	1.88151	0.00110478	-0.314146	0.806472
30	1.8646	-0.0378534	-0.334673	0.799149
30.25	1.84989	-0.0680106	-0.352497	0.791511
30.5	1.83609	-0.0953899	-0.370618	0.784361
30.75	1.82697	-0.122077	-0.38817	0.778224
31	1.81907	-0.144285	-0.401562	0.771302
31.25	1.81364	-0.162517	-0.417396	0.765727
31.5	1.8126	-0.177703	-0.429058	0.760189
31.75	1.80977	-0.189624	-0.441194	0.754836
32	1.81249	-0.198418	-0.450391	0.749306
32.25	1.81306	-0.206882	-0.461448	0.744732
32.5	1.82215	-0.21143	-0.470431	0.741075
32.75	1.8264	-0.213379	-0.482081	0.737633
33	1.83198	-0.211843	-0.492771	0.734339
33.25	1.84235	-0.212831	-0.501222	0.729989
33.5	1.85165	-0.211203	-0.511343	0.727256
33.75	1.86179	-0.207444	-0.521973	0.72303
34	1.87862	-0.203445	-0.530163	0.719077
34.25	1.89333	-0.200226	-0.538009	0.715909
34.5	1.90942	-0.198759	-0.547028	0.711242
34.75	1.92828	-0.197751	-0.554838	0.708533
35	1.95032	-0.19334	-0.562043	0.704292
35.25	1.97672	-0.197436	-0.569806	0.697605
35.5	2.00546	-0.199947	-0.574831	0.692335
35.75	2.03431	-0.204147	-0.580164	0.687975
36	2.06558	-0.211663	-0.585723	0.683405
36.25	2.10023	-0.218923	-0.591091	0.678231
36.5	2.13513	-0.229862	-0.592051	0.672192
36.75	2.17321	-0.239596	-0.592822	0.668748
37	2.21253	-0.26024	-0.592928	0.665838
37.25	2.25251	-0.271773	-0.595168	0.661508
37.5	2.29435	-0.292948	-0.593462	0.659679
37.75	2.33726	-0.311678	-0.590807	0.658563
38	2.38145	-0.332778	-0.587382	0.658987
38.25	2.42034	-0.357038	-0.581681	0.658498
38.5	2.46328	-0.382769	-0.575282	0.66022
38.75	2.50635	-0.411503	-0.568111	0.66213
39	2.54318	-0.443231	-0.558215	0.663625
39.25	2.57927	-0.47555	-0.546388	0.668086
39.5	2.61473	-0.509486	-0.534512	0.668953
39.75	2.64512	-0.547205	-0.5183	0.674308
40	2.67398	-0.584376	-0.502774	0.677241
40.25	2.69563	-0.629179	-0.484843	0.680753
40.5	2.71783	-0.672281	-0.467089	0.684787
40.75	2.73447	-0.715806	-0.444962	0.689489
41	2.75186	-0.76078	-0.424602	0.694751
41.25	2.76152	-0.804505	-0.401147	0.699829
41.5	2.76351	-0.850956	-0.381948	0.707271
41.75	2.76657	-0.898404	-0.358103	0.712863
42	2.76391	-0.947792	-0.339164	0.721032
42.25	2.76018	-0.998412	-0.318021	0.726537
42.5	2.75097	-1.04469	-0.299663	0.735596
42.75	2.73531	-1.09683	-0.282336	0.743183
43	2.71983	-1.14502	-0.269904	0.752309
43.25	2.70239	-1.19725	-0.256619	0.761466
43.5	2.67826	-1.24871	-0.246663	0.770573
43.75	2.65859	-1.30102	-0.241294	0.778631
44	2.62893	-1.3534	-0.236495	0.786306
44.25	2.59675	-1.40581	-0.235867	0.794435
44.5	2.56503	-1.46109	-0.238249	0.799667
44.75	2.53188	-1.51569	-0.240761	0.803341
45	2.49513	-1.56901	-0.247351	0.805402
45.25	2.45625	-1.62453	-0.255872	0.80683
45.5	2.41521	-1.67915	-0.265673	0.805595
45.75	2.37125	-1.73755	-0.274834	0.802863
46	2.32792	-1.78643	-0.289044	0.798826
46.25	2.28358	-1.83999	-0.302626	0.79554
46.5	2.23844	-1.89332	-0.315769	0.78516
46.75	2.19066	-1.94739	-0.329695	0.779652
47	2.14524	-1.99215	-0.341084	0.76962
47.25	2.10002	-2.04067	-0.35341	0.758788
47.5	2.05651	-2.08978	-0.365321	0.746005
47.75	2.00767	-2.13147	-0.374944	0.732409
48	1.96375	-2.17092	-0.384591	0.718463
48.25	1.91998	-2.20621	-0.390706	0.705947
48.5	1.88122	-2.24158	-0.39508	0.690387
48.75	1.84243	-2.26686	-0.399583	0.67516
49	1.80307	-2.29383	-0.40033	0.660427
49.25	1.77013	-2.31163	-0.398232	0.647582
49.5	1.73851	-2.32802	-0.394451	0.635011
49.75	1.70649	-2.34022	-0.387755	0.622181
50	1.68222	-2.34816	-0.379353	0.6114
50.25	1.65844	-2.35448	-0.368947	0.60081
50.5	1.63429	-2.35836	-0.351371	0.592499
50.75	1.61182	-2.35814	-0.336083	0.584535
51	1.59333	-2.3544	-0.317962	0.577467
51.25	1.57607	-2.35053	-0.296191	0.569988
51.5	1.56165	-2.34154	-0.272227	0.563327
51.75	1.54821	-2.33533	-0.245194	0.558874
52	1.53437	-2.32387	-0.215174	0.553418
52.25	1.52801	-2.30947	-0.182333	0.546995
52.5	1.51984	-2.29204	-0.147573	0.542647
52.75	1.51481	-2.2736	-0.111663	0.537757
53	1.50999	-2.2539	-0.0701592	0.531728
53.25	1.50819	-2.23086	-0.0268182	0.526505
53.5	1.51217	-2.20307	0.0191062	0.522033
53.75	1.51171	-2.17003	0.0668442	0.516526
54	1.5156	-2.13754	0.118718	0.513891
54.25	1.522	-2.10222	0.167937	0.507895
54.5	1.53108	-2.06013	0.223521	0.505189
54.75	1.53849	-2.01977	0.279614	0.501126
55	1.55034	-1.97523	0.334747	0.496637
55.25	1.55947	-1.9266	0.393945	0.493259
55.5	1.56885	-1.87883	0.45165	0.491455
55.75	1.58508	-1.82842	0.51214	0.487793
56	1.59991	-1.77627	0.569525	0.486951
56.25	1.61363	-1.72719	0.62736	0.484005
56.5	1.62985	-1.67779	0.685847	0.485655
56.75	1.64643	-1.62761	0.742675	0.486358
57	1.66651	-1.57805	0.799539	0.487711
57.25	1.67892	-1.53425	0.852325	0.489878
57.5	1.69748	-1.49155	0.905669	0.492604
57.75	1.71274	-1.45038	0.956547	0.497909
58	1.7282	-1.41054	1.00285	0.504213
58.25	1.74839	-1.37184	1.05027	0.511348
58.5	1.76002	-1.34196	1.09508	0.519535
58.75	1.77543	-1.31158	1.13636	0.530509
59	1.78818	-1.28768	1.17631	0.540918
59.25	1.79637	-1.26093	1.21192	0.555718
59.5	1.80671	-1.23961	1.24425	0.571245
59.75	1.81494	-1.22177	1.27683	0.586742
60	1.8252	-1.21033	1.3032	0.606589
60.25	1.83165	-1.19959	1.32763	0.624184
60.5	1.83838	-1.18853	1.35001	0.64428
60.75	1.84416	-1.18164	1.37276	0.665828
61	1.85033	-1.17216	1.38791	0.688262
61.25	1.85427	-1.16992	1.40636	0.710084
61.5	1.8564	-1.16616	1.41836	0.731981
61.75	1.85727	-1.16463	1.42849	0.75372
62	1.85799	-1.16323	1.43927	0.775831
62.25	1.85899	-1.16622	1.44894	0.800146
62.5	1.85634	-1.16767	1.45416	0.822198
62.75	1.85659	-1.16992	1.45859	0.846019
63	1.8535	-1.17252	1.45969	0.869542
63.25	1.84901	-1.17565	1.46022	0.890697
63.5	1.84703	-1.17656	1.4608	0.912411
63.75	1.84252	-1.1799	1.45637	0.932334
64	1.84081	-1.18222	1.45057	0.953976
64.25	1.83406	-1.18143	1.44407	0.97329
64.5	1.82925	-1.1808	1.43377	0.992568
64.75	1.82403	-1.18252	1.42389	1.01118
65	1.82023	-1.17751	1.40863	1.02676
65.25	1.81387	-1.17686	1.39349	1.0415
65.5	1.80491	-1.1672	1.37659	1.0551
65.75	1.79288	-1.15995	1.35663	1.06624
66	1.78651	-1.15356	1.33467	1.07615
66.25	1.77052	-1.14518	1.311	1.08271
66.5	1.75385	-1.13494	1.28669	1.09
66.75	1.7348	-1.1224	1.26131	1.09663
67	1.71767	-1.10646	1.23219	1.10048
67.25	1.69468	-1.09344	1.20501	1.10232
67.5	1.66833	-1.07402	1.17499	1.10202
67.75	1.64325	-1.06187	1.1472	1.10257
68	1.61549	-1.04246	1.11759	1.10205
68.25	1.58071	-1.02239	1.08926	1.10187
68.5	1.5442	-1.00141	1.06041	1.09901
68.75	1.51018	-0.983519	1.03323	1.09428
69	1.47166	-0.961293	1.00749	1.09134
69.25	1.43276	-0.939043	0.981649	1.08471
69.5	1.39393	-0.917967	0.95765	1.07831
69.75	1.34904	-0.894896	0.932169	1.07035
70	1.30683	-0.874393	0.91022	1.06163
70.25	1.26782	-0.853309	0.888792	1.05299
70.5	1.22795	-0.830811	0.868586	1.04215
70.75	1.18816	-0.812825	0.846992	1.03042
71	1.14976	-0.792009	0.828528	1.01846
71.25	1.11696	-0.770041	0.807384	1.00581
71.5	1.08145	-0.746243	0.78828	0.991819
71.75	1.04655	-0.723616	0.766106	0.976016
72	1.01549	-0.703189	0.7468	0.96307
72.25	0.990527	-0.681785	0.727423	0.949172
72.5	0.965368	-0.662569	0.707192	0.933976
72.75	0.941198	-0.637954	0.68625	0.917731
73	0.916467	-0.617998	0.666257	0.901802
73.25	0.898903	-0.595741	0.645458	0.88594
73.5	0.884397	-0.575046	0.62582	0.871825
73.75	0.870807	-0.552753	0.604997	0.855118
74	0.859594	-0.526941	0.585406	0.838349
74.25	0.854645	-0.502942	0.565401	0.822281
74.5	0.847797	-0.479864	0.545289	0.807086
74.75	0.846005	-0.455616	0.52686	0.791091
75	0.846246	-0.435578	0.510659	0.775094
75.25	0.847918	-0.410628	0.490867	0.760018
75.5	0.852355	-0.387191	0.473955	0.742354
75.75	0.861023	-0.364848	0.457339	0.725395
76	0.868347	-0.341974	0.44435	0.708888
76.25	0.879092	-0.32114	0.429903	0.689964
76.5	0.894302	-0.30099	0.417684	0.67348
76.75	0.910379	-0.278702	0.406389	0.653217
77	0.923769	-0.261207	0.396778	0.63546
77.25	0.942919	-0.237608	0.386905	0.616941
77.5	0.959672	-0.220739	0.379392	0.598545
77.75	0.981709	-0.197048	0.372447	0.581411
78	1.00102	-0.174752	0.366165	0.56326
78.25	1.0248	-0.154738	0.358474	0.547149
78.5	1.04762	-0.131525	0.355274	0.531259
78.75	1.06818	-0.114137	0.35179	0.516415
79	1.09254	-0.086966	0.347547	0.504712
79.25	1.11254	-0.0614738	0.34571	0.491648
79.5	1.13937	-0.0387425	0.342119	0.482552
79.75	1.16317	-0.0153996	0.341182	0.474075
80	1.18566	0.00854762	0.339737	0.468167
80.25	1.20845	0.0334	0.339049	0.46251
80.5	1.23284	0.0599951	0.340708	0.460638
80.75	1.25943	0.0842973	0.342237	0.460754
81	1.28569	0.1113	0.34072	0.461252
81.25	1.31197	0.136608	0.341182	0.464622
81.5	1.33896	0.161968	0.344062	0.467762
81.75	1.36531	0.187026	0.343956	0.473112
82	1.39209	0.216996	0.345141	0.481799
82.25	1.42162	0.246741	0.34776	0.488759
82.5	1.44885	0.276619	0.349218	0.496678
82.75	1.47547	0.303548	0.351078	0.507336
83	1.49874	0.341129	0.353318	0.51641
83.25	1.52291	0.37477	0.355357	0.52799
83.5	1.54882	0.40813	0.355736	0.539048
83.75	1.57127	0.444574	0.357289	0.551152
84	1.58949	0.485542	0.357905	0.562956
84.25	1.60545	0.527872	0.360157	0.573269
84.5	1.62178	0.570406	0.362574	0.585171
84.75	1.63489	0.618181	0.363925	0.598015
85	1.65026	0.662883	0.364814	0.60907
85.25	1.65861	0.711227	0.367113	0.623712
85.5	1.66578	0.761354	0.368832	0.63527
85.75	1.67419	0.80977	0.369093	0.646248
86	1.67508	0.859271	0.370859	0.657757
86.25	1.68133	0.907023	0.375173	0.669634
86.5	1.68044	0.958113	0.374782	0.68188
86.75	1.68022	1.00811	0.376844	0.693055
87	1.6786	1.05737	0.377531	0.702053
87.25	1.67349	1.10141	0.376725	0.713943
87.5	1.67171	1.14808	0.376832	0.724328
87.75	1.66809	1.19183	0.376133	0.736051
88	1.66207	1.23339	0.376002	0.746031
88.25	1.65662	1.27712	0.374568	0.756494
88.5	1.64885	1.31593	0.372008	0.768347
88.75	1.64159	1.34866	0.371167	0.777438
89	1.63145	1.38275	0.369105	0.789078
89.25	1.62183	1.41393	0.367576	0.800674
89.5	1.60565	1.44875	0.365905	0.812631
89.75	1.5905	1.47739	0.365312	0.824163
90	1.57576	1.50543	0.366485	0.833981
90.25	1.56132	1.53332	0.366236	0.845553
90.5	1.54345	1.55867	0.367587	0.856705
90.75	1.52414	1.58586	0.372731	0.868483
91	1.50564	1.61156	0.375386	0.880722
91.25	1.48665	1.63176	0.380281	0.89273
91.5	1.46671	1.65443	0.386218	0.90268
91.75	1.44696	1.67602	0.395474	0.913043
92	1.42114	1.6969	0.4087	0.923734
92.25	1.40278	1.7122	0.420587	0.936067
92.5	1.37939	1.7311	0.43328	0.946959
92.75	1.35767	1.74846	0.450536	0.959449
93	1.33413	1.76146	0.466702	0.970882
93.25	1.30773	1.77459	0.485617	0.983108
93.5	1.28173	1.78456	0.506973	0.995069
93.75	1.25453	1.79354	0.530735	1.00713
94	1.22971	1.7957	0.552305	1.01849
94.25	1.20349	1.79739	0.577714	1.03024
94.5	1.17294	1.79534	0.60374	1.04166
94.75	1.14234	1.79099	0.63024	1.05369
95	1.11347	1.7786	0.658482	1.06398
95.25	1.08331	1.76673	0.685978	1.07217
95.5	1.05435	1.74397	0.71377	1.08159
95.75	1.02277	1.72155	0.741656	1.09051
96	0.989147	1.69135	0.770621	1.09895
96.25	0.957148	1.65861	0.797796	1.1037
96.5	0.923577	1.61769	0.826584	1.11207
96.75	0.890704	1.57713	0.853108	1.11601
97	0.856074	1.52558	0.875945	1.11832
97.25	0.820398	1.47631	0.900679	1.11974
97.5	0.783863	1.41938	0.92411	1.12206
97.75	0.751053	1.36064	0.944566	1.12105
98	0.714496	1.2968	0.962852	1.12009
98.25	0.673992	1.22849	0.980783	1.11731
98.5	0.637215	1.1574	0.995242	1.11231
98.75	0.599975	1.08405	1.0092	1.10635
99	0.561327	1.01005	1.01867	1.09808
99.25	0.524784	0.929671	1.0273	1.0887
99.5	0.488135	0.851876	1.03453	1.07766
99.75	0.450532	0.774927	1.03778	1.06746
100	0.412027	0.692056	1.04046	1.05527
100.25	0.380276	0.610326	1.03973	1.04203
100.5	0.344267	0.530997	1.04123	1.02854
100.75	0.311585	0.452142	1.03622	1.01482
101	0.282196	0.37392	1.03324	0.999579
101.25	0.246257	0.296119	1.02978	0.987358
101.5	0.215482	0.221564	1.02341	0.97611
101.75	0.182267	0.14621	1.01686	0.965993
102	0.149607	0.0707655	1.01321	0.957747
102.25	0.118112	-0.00241514	1.00414	0.948562
102.5	0.0826856	-0.0707839	0.997032	0.943101
102.75	0.0521231	-0.14487	0.9903	0.938753
103	0.0143002	-0.214213	0.982099	0.935586
103.25	-0.014314	-0.286118	0.971788	0.936852
103.5	-0.053033	-0.358536	0.964429	0.936241
103.75	-0.0938995	-0.42607	0.954983	0.938785
104	-0.131815	-0.493873	0.944826	0.944429
104.25	-0.173697	-0.562882	0.934705	0.949209
104.5	-0.217323	-0.630857	0.927689	0.958049
104.75	-0.261226	-0.70093	0.916406	0.967844
105	-0.310013	-0.767554	0.905823	0.977514
105.25	-0.358908	-0.839218	0.894351	0.989301
105.5	-0.405598	-0.906968	0.883602	1.00342
105.75	-0.465443	-0.979943	0.870517	1.01647
106	-0.513563	-1.0514	0.857362	1.03183
106.25	-0.569021	-1.12158	0.841398	1.04972
106.5	-0.624308	-1.1973	0.825339	1.06635
106.75	-0.681814	-1.26732	0.810501	1.08655
107	-0.736219	-1.34334	0.795213	1.10456
107.25	-0.793682	-1.42106	0.779237	1.12473
107.5	-0.84963	-1.50039	0.764364	1.14453
107.75	-0.905152	-1.57304	0.748613	1.16508
108	-0.956202	-1.651	0.735896	1.18662
108.25	-1.01026	-1.72795	0.721745	1.20647
108.5	-1.06486	-1.80218	0.708519	1.22993
108.75	-1.1129	-1.8754	0.696964	1.24867
109	-1.16746	-1.9493	0.685764	1.26911
109.25	-1.21821	-2.02032	0.674458	1.28979
109.5	-1.26441	-2.09238	0.665344	1.31157
109.75	-1.31474	-2.16281	0.653813	1.33142
110	-1.35723	-2.23172	0.644059	1.35122
110.25	-1.40284	-2.29838	0.633084	1.37184
110.5	-1.4455	-2.36327	0.62371	1.39162
110.75	-1.48845	-2.42824	0.610697	1.41455
111	-1.5273	-2.49199	0.599166	1.43374
111.25	-1.5728	-2.55274	0.58658	1.45544
111.5	-1.61387	-2.61797	0.571801	1.47416
111.75	-1.65662	-2.68015	0.556998	1.49248
112	-1.69954	-2.74256	0.538652	1.51034
112.25	-1.73972	-2.80168	0.522333	1.52817
112.5	-1.77905	-2.86375	0.50273	1.54436
112.75	-1.82003	-2.92551	0.481291	1.56041
113	-1.86409	-2.98326	0.458062	1.57693
113.25	-1.90296	-3.04056	0.434501	1.59101
113.5	-1.9445	-3.09648	0.407089	1.60734
113.75	-1.98405	-3.15474	0.378977	1.62273
114	-2.02398	-3.20975	0.348554	1.64003
114.25	-2.06328	-3.26306	0.314682	1.6544
114.5	-2.10399	-3.31429	0.27869	1.67266
114.75	-2.14421	-3.36495	0.242507	1.6907
115	-2.18268	-3.41172	0.203504	1.71141
115.25	-2.22779	-3.4596	0.162047	1.73127
115.5	-2.26718	-3.50384	0.120425	1.75137
115.75	-2.30657	-3.54768	0.0776526	1.77477
116	-2.34645	-3.58484	0.0341101	1.79704
116.25	-2.38611	-3.62709	-0.0118023	1.8208
116.5	-2.4265	-3.66597	-0.0537924	1.84329
116.75	-2.46474	-3.70602	-0.0999302	1.86545
117	-2.50436	-3.74423	-0.142548	1.88691
117.25	-2.54037	-3.78036	-0.185569	1.90963
117.5	-2.58027	-3.82048	-0.228282	1.93197
117.75	-2.61791	-3.85521	-0.268767	1.95288
118	-2.65156	-3.88941	-0.309642	1.97387
118.25	-2.68846	-3.92939	-0.347567	1.99389
118.5	-2.72143	-3.97005	-0.38452	2.01262
118.75	-2.75327	-4.00706	-0.421686	2.03338
119	-2.78801	-4.05008	-0.45762	2.04998
119.25	-2.82488	-4.09532	-0.491254	2.06844
119.5	-2.8611	-4.14684	-0.527899	2.08626
119.75	-2.89356	-4.1953	-0.561415	2.10282
120	-2.92579	-4.25089	-0.593627	2.11964
120.25	-2.95986	-4.31038	-0.626433	2.13545
120.5	-2.99488	-4.37315	-0.657815	2.15129
120.75	-3.03269	-4.43869	-0.690194	2.16663
121	-3.06812	-4.50713	-0.723639	2.18011
121.25	-3.10345	-4.57961	-0.754725	2.19385
121.5	-3.14098	-4.66077	-0.787471	2.20892
121.75	-3.17732	-4.74028	-0.820785	2.22064
122	-3.21373	-4.82451	-0.854847	2.23372
122.25	-3.25617	-4.92057	-0.887521	2.24544
122.5	-3.29392	-5.01184	-0.921938	2.25763
122.75	-3.33428	-5.10388	-0.955667	2.26659
123	-3.37688	-5.19784	-0.990984	2.27662
123.25	-3.4192	-5.29679	-1.02589	2.28437
123.5	-3.46165	-5.39936	-1.0631	2.28787
123.75	-3.50849	-5.49999	-1.09999	2.29283
124	-3.55483	-5.60118	-1.13974	2.29463
124.25	-3.60441	-5.70483	-1.17928	2.29486
124.5	-3.65806	-5.80156	-1.22274	2.29405
124.75	-3.71082	-5.9022	-1.2656	2.28774
125	-3.77035	-5.99591	-1.31125	2.28138
125.25	-3.8326	-6.09198	-1.35906	2.27163
125.5	-3.89643	-6.18798	-1.40925	2.26169
125.75	-3.96209	-6.27541	-1.46196	2.25116
126	-4.03108	-6.36741	-1.51541	2.23711
126.25	-4.10526	-6.45648	-1.57465	2.22029
126.5	-4.1776	-6.54576	-1.63379	2.20265
126.75	-4.25151	-6.63333	-1.69654	2.18393
127	-4.32766	-6.72402	-1.76163	2.16319
127.25	-4.40603	-6.8118	-1.83052	2.14124
127.5	-4.48547	-6.901	-1.90014	2.11887
127.75	-4.56174	-6.98684	-1.97415	2.09414
128	-4.64039	-7.07408	-2.05026	2.07132
128.25	-4.72226	-7.15901	-2.12992	2.04673
128.5	-4.80091	-7.2474	-2.21114	2.02054
128.75	-4.88437	-7.33066	-2.29438	1.99811
129	-4.97174	-7.41821	-2.38042	1.97056
129.25	-5.05255	-7.50053	-2.47007	1.94659
129.5	-5.13793	-7.58081	-2.5585	1.91851
129.75	-5.22407	-7.66487	-2.65361	1.89295
130	-5.31096	-7.74503	-2.74876	1.86439
130.25	-5.39764	-7.82814	-2.84707	1.83776
130.5	-5.48462	-7.90877	-2.94816	1.80878
130.75	-5.56856	-7.98816	-3.04961	1.7819
131	-5.65271	-8.06727	-3.15458	1.75164
131.25	-5.73836	-8.14039	-3.26039	1.72443
131.5	-5.81771	-8.22025	-3.36722	1.69492
131.75	-5.89812	-8.29158	-3.4768	1.66676
132	-5.97566	-8.36474	-3.58537	1.6411
132.25	-6.04759	-8.43356	-3.69534	1.61502
132.5	-6.11563	-8.50309	-3.80529	1.58886
132.75	-6.18309	-8.56523	-3.91468	1.56298
133	-6.24612	-8.62995	-4.02187	1.53731
133.25	-6.30205	-8.68888	-4.12867	1.51312
133.5	-6.3568	-8.74907	-4.23411	1.48989
133.75	-6.40689	-8.80437	-4.33755	1.46781
134	-6.45411	-8.86018	-4.4375	1.44434
134.25	-6.49771	-8.91376	-4.53497	1.41926
134.5	-6.53345	-8.96316	-4.62957	1.39911
134.75	-6.56826	-9.01499	-4.72022	1.37639
135	-6.6004	-9.06116	-4.80633	1.35456
135.25	-6.62571	-9.10666	-4.8912	1.33426
135.5	-6.65058	-9.15103	-4.96971	1.31122
135.75	-6.67655	-9.1919	-5.04573	1.28807
136	-6.69346	-9.23527	-5.12154	1.26689
136.25	-6.71071	-9.27247	-5.18887	1.2433
136.5	-6.72617	-9.31523	-5.25462	1.2206
136.75	-6.74295	-9.35194	-5.31955	1.19766
137	-6.75568	-9.38742	-5.38052	1.17466
137.25	-6.7758	-9.42887	-5.43784	1.14759
137.5	-6.78743	-9.46692	-5.49614	1.12172
137.75	-6.80379	-9.50549	-5.5508	1.09629
138	-6.81798	-9.54763	-5.60476	1.06786
138.25	-6.83303	-9.58661	-5.65756	1.04114
138.5	-6.84808	-9.62839	-5.70796	1.00975
138.75	-6.86553	-9.67158	-5.75841	0.978361
139	-6.88486	-9.71531	-5.8077	0.946884
139.25	-6.90418	-9.76192	-5.85728	0.914793
139.5	-6.92016	-9.80989	-5.90276	0.87831
139.75	-6.94192	-9.85756	-5.94926	0.843684
140	-6.95858	-9.90571	-5.99424	0.805636
140.25	-6.97757	-9.9524	-6.03955	0.768378
140.5	-6.99954	-10.0017	-6.08206	0.728857
140.75	-7.02219	-10.0459	-6.12468	0.689904
141	-7.03858	-10.0896	-6.16574	0.651694
141.25	-7.05602	-10.1318	-6.20558	0.611455
141.5	-7.07434	-10.1704	-6.24033	0.571084
141.75	-7.09347	-10.2076	-6.27517	0.532658
142	-7.11707	-10.2423	-6.30639	0.492308
142.25	-7.1357	-10.2686	-6.33531	0.45285
142.5	-7.1548	-10.297	-6.36361	0.413727
142.75	-7.17619	-10.3168	-6.38559	0.37453
143	-7.19466	-10.3385	-6.40633	0.336545
143.25	-7.21737	-10.3542	-6.4254	0.296133
143.5	-7.23717	-10.369	-6.44134	0.258088
143.75	-7.25743	-10.3778	-6.45249	0.218408
144	-7.27993	-10.3842	-6.46299	0.179435
144.25	-7.29705	-10.3877	-6.46943	0.140748
144.5	-7.31815	-10.3874	-6.47557	0.101498
144.75	-7.33468	-10.3843	-6.47856	0.0650339
145	-7.34913	-10.3825	-6.47783	0.0269462
145.25	-7.36532	-10.3747	-6.47687	-0.0114866
145.5	-7.37851	-10.3708	-6.47308	-0.0500464
145.75	-7.39033	-10.3591	-6.46608	-0.0873287
146	-7.40083	-10.3536	-6.45732	-0.123929
146.25	-7.41013	-10.345	-6.44982	-0.163963
146.5	-7.41928	-10.3334	-6.43697	-0.201437
146.75	-7.41918	-10.3218	-6.42201	-0.240024
147	-7.41844	-10.3155	-6.40784	-0.281275
147.25	-7.41698	-10.3051	-6.39145	-0.321541
147.5	-7.40892	-10.2927	-6.37308	-0.361833
147.75	-7.40408	-10.2819	-6.35269	-0.404779
148	-7.39097	-10.2697	-6.33006	-0.44759
148.25	-7.37805	-10.2535	-6.30903	-0.488487
148.5	-7.35797	-10.2383	-6.28226	-0.528915
148.75	-7.3393	-10.2157	-6.25655	-0.569931
149	-7.31535	-10.1944	-6.22711	-0.611886
149.25	-7.29225	-10.172	-6.19842	-0.649983
149.5	-7.26634	-10.142	-6.16674	-0.689021
149.75	-7.23585	-10.1152	-6.1347	-0.725835
150	-7.2062	-10.08	-6.10282	-0.762667
150.25	-7.1741	-10.0423	-6.06953	-0.796625
150.5	-7.1399	-9.99848	-6.03484	-0.82777
150.75	-7.10095	-9.95629	-6.00053	-0.857741
151	-7.06011	-9.91512	-5.96611	-0.886096
151.25	-7.01328	-9.86665	-5.93014	-0.912421
151.5	-6.96964	-9.81699	-5.89466	-0.936454
151.75	-6.9231	-9.76927	-5.85749	-0.960092
152	-6.86966	-9.72211	-5.82139	-0.982455
152.25	-6.81741	-9.67335	-5.78344	-1.00313
152.5	-6.76352	-9.62406	-5.7441	-1.02435
152.75	-6.70146	-9.5738	-5.70341	-1.04405
153	-6.64105	-9.52736	-5.66149	-1.06615
153.25	-6.57487	-9.47772	-5.6213	-1.08534
153.5	-6.50854	-9.43194	-5.57635	-1.10809
153.75	-6.43889	-9.38323	-5.53153	-1.13069
154	-6.36453	-9.3402	-5.48247	-1.15482
154.25	-6.29269	-9.29245	-5.43208	-1.18025
154.5	-6.21504	-9.24819	-5.38004	-1.2071
154.75	-6.13789	-9.20362	-5.32747	-1.23555
155	-6.05701	-9.15945	-5.27172	-1.2643
155.25	-5.98107	-9.1187	-5.21347	-1.29337
155.5	-5.90247	-9.07645	-5.15323	-1.32393
155.75	-5.82466	-9.03303	-5.09123	-1.35776
156	-5.7456	-8.99302	-5.02579	-1.39075
156.25	-5.66569	-8.95024	-4.96027	-1.42492
156.5	-5.58061	-8.91193	-4.88822	-1.46256
156.75	-5.50124	-8.87136	-4.81572	-1.49862
157	-5.41696	-8.83432	-4.74251	-1.53652
157.25	-5.33803	-8.78991	-4.66586	-1.57513
157.5	-5.25332	-8.75176	-4.59004	-1.61335
157.75	-5.17135	-8.71102	-4.51017	-1.65152
158	-5.08598	-8.67165	-4.43318	-1.69278
158.25	-5.00121	-8.63064	-4.35356	-1.73038
158.5	-4.91804	-8.58959	-4.2712	-1.77025
158.75	-4.83262	-8.55084	-4.19082	-1.80934
159	-4.74769	-8.51466	-4.10919	-1.84647
159.25	-4.66221	-8.47197	-4.02841	-1.88637
159.5	-4.57568	-8.43552	-3.94715	-1.92615
159.75	-4.49111	-8.39501	-3.86604	-1.96538
160	-4.40307	-8.35701	-3.78344	-2.00286
160.25	-4.31156	-8.31821	-3.70378	-2.04166
160.5	-4.22126	-8.27917	-3.62271	-2.08001
160.75	-4.12721	-8.23629	-3.53839	-2.1195
161	-4.03281	-8.20131	-3.45794	-2.15705
161.25	-3.93587	-8.15787	-3.37599	-2.19611
161.5	-3.833	-8.1157	-3.29334	-2.23696
161.75	-3.72983	-8.07305	-3.21005	-2.27914
162	-3.62071	-8.02955	-3.12607	-2.32215
162.25	-3.51023	-7.98489	-3.04389	-2.36365
162.5	-3.39292	-7.93591	-2.95762	-2.40625
162.75	-3.27818	-7.88842	-2.87161	-2.45238
163	-3.15434	-7.83312	-2.78558	-2.49818
163.25	-3.02863	-7.77536	-2.69871	-2.54339
163.5	-2.90119	-7.71604	-2.61316	-2.59262
163.75	-2.77187	-7.65352	-2.5249	-2.64186
164	-2.63685	-7.58273	-2.4393	-2.69306
164.25	-2.50226	-7.51155	-2.35316	-2.74561
164.5	-2.36151	-7.43203	-2.26706	-2.79896
164.75	-2.22302	-7.34824	-2.1827	-2.8524
165	-2.08255	-7.26274	-2.09881	-2.90904
165.25	-1.93785	-7.17335	-2.01574	-2.96471
165.5	-1.79532	-7.07534	-1.93352	-3.01942
165.75	-1.65456	-6.97825	-1.85493	-3.08003
166	-1.51247	-6.87297	-1.77555	-3.13943
166.25	-1.37014	-6.76303	-1.69936	-3.19815
166.5	-1.22425	-6.65384	-1.62075	-3.25926
166.75	-1.08526	-6.53835	-1.54408	-3.32107
167	-0.948579	-6.41969	-1.46855	-3.38305
167.25	-0.809333	-6.29889	-1.39372	-3.44699
167.5	-0.673679	-6.16975	-1.31874	-3.50984
167.75	-0.535272	-6.04247	-1.24335	-3.57341
168	-0.403784	-5.91239	-1.16642	-3.63819
168.25	-0.273044	-5.78329	-1.0915	-3.70475
168.5	-0.142758	-5.64994	-1.0134	-3.77008
168.75	-0.0165256	-5.51434	-0.937131	-3.83542
169	0.110625	-5.37587	-0.857643	-3.89852
169.25	0.238166	-5.24154	-0.780443	-3.96357
169.5	0.3656	-5.10132	-0.69958	-4.0277
169.75	0.492415	-4.95676	-0.620862	-4.09009
170	0.614396	-4.81632	-0.540462	-4.14925
170.25	0.742463	-4.67543	-0.458082	-4.20893
170.5	0.870964	-4.52975	-0.374778	-4.26893
170.75	0.999629	-4.38854	-0.293252	-4.32488
171	1.12462	-4.24361	-0.206534	-4.38032
171.25	1.25416	-4.10152	-0.121417	-4.43461
171.5	1.38075	-3.96117	-0.0367732	-4.48815
171.75	1.51015	-3.82325	0.0502757	-4.53869
172	1.64006	-3.68943	0.138404	-4.59033
172.25	1.76862	-3.55423	0.226887	-4.63896
172.5	1.90142	-3.42171	0.31556	-4.68428
172.75	2.03239	-3.29415	0.405513	-4.72819
173	2.16103	-3.16727	0.495726	-4.77255
173.25	2.29447	-3.04991	0.590549	-4.81282
173.5	2.42624	-2.93079	0.682813	-4.85117
173.75	2.55563	-2.81628	0.777341	-4.88945
174	2.68179	-2.70211	0.872793	-4.92546
174.25	2.8073	-2.59612	0.970188	-4.95973
174.5	2.93169	-2.4875	1.06877	-4.99252
174.75	3.05925	-2.38611	1.16647	-5.02423
175	3.18163	-2.2868	1.26734	-5.05269
175.25	3.30452	-2.18703	1.36737	-5.08199
175.5	3.41967	-2.09272	1.47036	-5.10909
175.75	3.53676	-2.00105	1.57271	-5.13506
176	3.65619	-1.90746	1.67782	-5.16061
176.25	3.7716	-1.81819	1.77949	-5.18213
176.5	3.88268	-1.72878	1.88307	-5.20408
176.75	3.99546	-1.64125	1.98551	-5.22748
177	4.10828	-1.55092	2.0873	-5.24742
177.25	4.22182	-1.46354	2.18727	-5.26475
177.5	4.328	-1.37071	2.28656	-5.28056
177.75	4.43846	-1.27893	2.38636	-5.29313
178	4.54489	-1.1896	2.4839	-5.30736
178.25	4.65008	-1.0989	2.57995	-5.31536
178.5	4.75353	-1.00789	2.67491	-5.32357
178.75	4.85402	-0.913127	2.76791	-5.32832
179	4.95645	-0.817812	2.85916	-5.32921
179.25	5.05514	-0.71887	2.94756	-5.33114
179.5	5.1573	-0.622139	3.03453	-5.32574
179.75	5.25144	-0.518519	3.12007	-5.32083
180	5.34976	-0.412834	3.20379	-5.31265
180.25	5.44522	-0.305671	3.28324	-5.30103
180.5	5.53748	-0.194525	3.36232	-5.28725
180.75	5.62781	-0.076518	3.43817	-5.26894
181	5.71883	0.0451357	3.51006	-5.24924
181.25	5.80944	0.172977	3.58458	-5.22692
181.5	5.90173	0.302486	3.65384	-5.201
181.75	5.98651	0.431463	3.72099	-5.17012
182	6.07815	0.567011	3.78879	-5.13984
182.25	6.16229	0.705	3.85376	-5.10565
182.5	6.25164	0.844694	3.91737	-5.07135
182.75	6.34098	0.988929	3.98209	-5.03415
183	6.43184	1.1329	4.0464	-4.99613
183.25	6.52254	1.27897	4.1096	-4.95874
183.5	6.6142	1.42286	4.17449	-4.92097
183.75	6.70926	1.57027	4.23871	-4.88393
184	6.80127	1.71654	4.30536	-4.84624
184.25	6.89755	1.86441	4.37052	-4.80856
184.5	6.99489	2.01231	4.43702	-4.77496
184.75	7.09418	2.16036	4.50357	-4.74194
185	7.19302	2.30979	4.57151	-4.70927
185.25	7.29421	2.45543	4.63709	-4.67915
185.5	7.39734	2.60401	4.7025	-4.65094
185.75	7.49915	2.74767	4.76899	-4.62542
186	7.60443	2.89186	4.83432	-4.6031
186.25	7.70787	3.03713	4.89995	-4.57926
186.5	7.81125	3.17716	4.96549	-4.56073
186.75	7.91977	3.31722	5.02848	-4.54428
187	8.02731	3.45626	5.0923	-4.53019
187.25	8.1285	3.59445	5.15367	-4.51745
187.5	8.23799	3.72711	5.21399	-4.5072
187.75	8.34087	3.85958	5.27209	-4.49674
188	8.44481	3.99048	5.33102	-4.49155
188.25	8.54662	4.11804	5.38915	-4.4857
188.5	8.64739	4.24934	5.44556	-4.48137
188.75	8.74686	4.38018	5.50067	-4.47697
189	8.84328	4.50496	5.55436	-4.47337
189.25	8.93457	4.63222	5.60705	-4.47024
189.5	9.0299	4.75766	5.66047	-4.46736
189.75	9.11804	4.88689	5.71305	-4.46054
190	9.20709	5.01184	5.76266	-4.45531
190.25	9.29257	5.14319	5.81159	-4.44859
190.5	9.37898	5.27209	5.86059	-4.44131
190.75	9.4594	5.40723	5.90908	-4.43149
191	9.5425	5.54406	5.95608	-4.42032
191.25	9.62027	5.68	6.00365	-4.40824
191.5	9.70178	5.81883	6.0488	-4.39501
191.75	9.77474	5.96201	6.09624	-4.38081
192	9.85216	6.10604	6.14206	-4.36581
192.25	9.92388	6.2539	6.18929	-4.35049
192.5	9.99679	6.40345	6.23614	-4.3356
192.75	10.0692	6.55375	6.28287	-4.31953
193	10.1389	6.71028	6.33277	-4.30379
193.25	10.2041	6.86731	6.38263	-4.28928
193.5	10.272	7.02255	6.43519	-4.27655
193.75	10.3373	7.17789	6.4842	-4.26295
194	10.4033	7.34134	6.53922	-4.25213
194.25	10.4636	7.49931	6.59051	-4.24332
194.5	10.5227	7.65832	6.64629	-4.23647
194.75	10.5815	7.81812	6.69974	-4.2309
195	10.6379	7.97462	6.75596	-4.23008
195.25	10.6915	8.13545	6.81125	-4.22975
195.5	10.7411	8.29413	6.8676	-4.23057
195.75	10.7935	8.45006	6.9205	-4.23304
196	10.841	8.60933	6.97644	-4.23604
196.25	10.8918	8.76615	7.03045	-4.24381
196.5	10.94	8.91765	7.08325	-4.24647
196.75	10.9854	9.07011	7.13705	-4.25343
197	11.0327	9.21981	7.18896	-4.26038
197.25	11.077	9.36933	7.23992	-4.26529
197.5	11.1235	9.51191	7.28858	-4.27042
197.75	11.1701	9.65793	7.33567	-4.27603
198	11.2155	9.7959	7.38079	-4.27765
198.25	11.2618	9.93366	7.42502	-4.28081
198.5	11.3137	10.0708	7.46578	-4.2776
198.75	11.3636	10.1988	7.50419	-4.27476
199	11.417	10.3277	7.54115	-4.27025
199.25	11.4721	10.4561	7.57438	-4.26381
199.5	11.5311	10.5783	7.60412	-4.25306
199.75	11.587	10.7009	7.63234	-4.24136
200	11.6477	10.8179	7.66142	-4.22578
200.25	11.7096	10.9346	7.68299	-4.2075
200.5	11.7751	11.0495	7.70808	-4.18894
200.75	11.8418	11.1565	7.72689	-4.16569
201	11.9117	11.2699	7.74487	-4.14188
201.25	11.9771	11.3772	7.76283	-4.11496
201.5	12.0449	11.4825	7.77966	-4.08786
201.75	12.1191	11.5847	7.79615	-4.05751
202	12.1876	11.6912	7.81007	-4.02581
202.25	12.2613	11.7939	7.8253	-3.99329
202.5	12.3332	11.8993	7.83932	-3.95676
202.75	12.407	11.9978	7.85125	-3.92084
203	12.4772	12.0989	7.86614	-3.88293
203.25	12.5525	12.2071	7.87751	-3.84097
203.5	12.6275	12.3114	7.89083	-3.7989
203.75	12.6989	12.4147	7.90022	-3.75609
204	12.7701	12.5201	7.9103	-3.71058
204.25	12.8387	12.6274	7.91931	-3.66465
204.5	12.9092	12.736	7.92911	-3.6214
204.75	12.9777	12.8446	7.93614	-3.5771
205	13.0388	12.9527	7.94579	-3.52963
205.25	13.1023	13.0613	7.95153	-3.48438
205.5	13.1631	13.1695	7.95707	-3.44009
205.75	13.2207	13.2785	7.96381	-3.39479
206	13.2774	13.3875	7.96941	-3.35201
206.25	13.3361	13.4985	7.97448	-3.3113
206.5	13.3915	13.599	7.97816	-3.2717
206.75	13.4467	13.7071	7.9828	-3.23054
207	13.4998	13.8071	7.98874	-3.19239
207.25	13.5559	13.9077	7.99407	-3.15641
207.5	13.6117	14.008	7.99907	-3.1197
207.75	13.666	14.1021	8.00654	-3.0858
208	13.7256	14.1941	8.01148	-3.05233
208.25	13.7842	14.2827	8.01854	-3.0203
208.5	13.8418	14.3718	8.02728	-2.99144
208.75	13.9063	14.4506	8.03505	-2.96187
209	13.9681	14.5319	8.04256	-2.93347
209.25	14.0287	14.6061	8.05039	-2.9058
209.5	14.0978	14.6759	8.05965	-2.87771
209.75	14.1624	14.7427	8.06795	-2.85202
210	14.2315	14.8072	8.07612	-2.82159
210.25	14.3001	14.8712	8.08403	-2.79423
210.5	14.3663	14.9254	8.08889	-2.76462
210.75	14.4366	14.9819	8.09386	-2.73574
211	14.5026	15.0334	8.09966	-2.70465
211.25	14.5727	15.0852	8.10228	-2.67061
211.5	14.6356	15.1334	8.10454	-2.63485
211.75	14.7047	15.1823	8.10592	-2.59776
212	14.7684	15.2287	8.10726	-2.56016
212.25	14.8296	15.2769	8.10701	-2.51885
212.5	14.8901	15.3209	8.10817	-2.47609
212.75	14.9524	15.3646	8.10591	-2.43004
213	15.0094	15.4099	8.10403	-2.38551
213.25	15.0674	15.4544	8.10223	-2.33586
213.5	15.126	15.4971	8.10123	-2.28624
213.75	15.1834	15.545	8.09719	-2.2353
214	15.241	15.5903	8.09517	-2.18281
214.25	15.2959	15.6342	8.09375	-2.13017
214.5	15.3527	15.686	8.09256	-2.07341
214.75	15.4093	15.7272	8.09022	-2.01787
215	15.469	15.7738	8.08982	-1.96287
215.25	15.5258	15.8244	8.08747	-1.9062
215.5	15.5827	15.8727	8.08653	-1.84863
215.75	15.6418	15.922	8.08555	-1.79044
216	15.7064	15.9761	8.08555	-1.73321
216.25	15.764	16.0299	8.08535	-1.67566
216.5	15.8263	16.0827	8.08484	-1.61989
216.75	15.8872	16.141	8.0863	-1.56639
217	15.9482	16.2003	8.08886	-1.50962
217.25	16.008	16.2589	8.09182	-1.45781
217.5	16.0673	16.3216	8.0956	-1.40524
217.75	16.132	16.386	8.09841	-1.35607
218	16.1924	16.4559	8.10507	-1.30572
218.25	16.2541	16.524	8.11443	-1.2609
218.5	16.3117	16.5947	8.12427	-1.21421
218.75	16.3729	16.6692	8.13354	-1.16592
219	16.4295	16.7434	8.14371	-1.12404
219.25	16.4873	16.8291	8.15384	-1.08062
219.5	16.5453	16.9073	8.16646	-1.04015
219.75	16.6026	16.994	8.18123	-1.00026
220	16.6596	17.0828	8.19225	-0.957739
220.25	16.7182	17.1735	8.20527	-0.916957
220.5	16.7678	17.268	8.2189	-0.875295
220.75	16.8246	17.3632	8.23294	-0.833568
221	16.8757	17.4571	8.24537	-0.790413
221.25	16.9285	17.561	8.25852	-0.746207
221.5	16.978	17.6637	8.2715	-0.698873
221.75	17.0266	17.7703	8.28169	-0.651471
222	17.0742	17.8767	8.2928	-0.599404
222.25	17.1182	17.9832	8.30404	-0.54562
222.5	17.1606	18.0932	8.31553	-0.488794
222.75	17.2005	18.2071	8.32393	-0.429372
223	17.2396	18.322	8.33385	-0.367533
223.25	17.2742	18.4332	8.3419	-0.30249
223.5	17.3117	18.5545	8.3498	-0.234798
223.75	17.3396	18.6698	8.35824	-0.16564
224	17.3692	18.7886	8.36619	-0.0952043
224.25	17.395	18.9041	8.3721	-0.0231557
224.5	17.4243	19.0212	8.38071	0.0517832
224.75	17.4475	19.138	8.38744	0.12632
225	17.4723	19.2519	8.39452	0.201618
225.25	17.491	19.364	8.40157	0.278371
225.5	17.5123	19.4738	8.40747	0.354316
225.75	17.5342	19.5815	8.41477	0.432364
226	17.5508	19.6837	8.42121	0.508005
226.25	17.5662	19.7848	8.42851	0.582444
226.5	17.5826	19.8832	8.4351	0.658135
226.75	17.5989	19.9744	8.44074	0.729975
227	17.6116	20.0631	8.4467	0.80407
227.25	17.6277	20.1518	8.45273	0.874926
227.5	17.6388	20.2365	8.4577	0.945776
227.75	17.6532	20.3186	8.46359	1.01201
228	17.6674	20.3962	8.46685	1.07975
228.25	17.683	20.4722	8.4719	1.14464
228.5	17.6999	20.5506	8.47651	1.21007
228.75	17.717	20.6239	8.48048	1.27135
229	17.7378	20.694	8.48254	1.33373
229.25	17.7549	20.7617	8.48665	1.39685
229.5	17.7803	20.831	8.49063	1.45706
229.75	17.8016	20.8944	8.49515	1.51975
230	17.8297	20.9603	8.50044	1.57803
230.25	17.8574	21.0221	8.50621	1.64177
230.5	17.8868	21.086	8.50975	1.70332
230.75	17.9147	21.1444	8.51781	1.76362
231	17.9467	21.2015	8.52615	1.82399
231.25	17.9768	21.2562	8.53583	1.88704
231.5	18.0065	21.3053	8.54602	1.95087
231.75	18.0397	21.3513	8.55979	2.0159
232	18.0697	21.3972	8.57216	2.08106
232.25	18.1017	21.4381	8.58574	2.14914
232.5	18.1295	21.4696	8.60134	2.2148
232.75	18.1618	21.5045	8.61703	2.28351
233	18.1964	21.5308	8.63514	2.35133
233.25	18.2222	21.5527	8.65347	2.42354
233.5	18.255	21.5687	8.6743	2.49241
233.75	18.2893	21.5796	8.6962	2.56444
234	18.32	21.5897	8.72	2.63656
234.25	18.3496	21.5938	8.74392	2.70835
234.5	18.383	21.592	8.76976	2.78312
234.75	18.4112	21.5858	8.79846	2.85513
235	18.4427	21.5747	8.82888	2.92762
235.25	18.4696	21.558	8.86192	3.00145
235.5	18.5004	21.5432	8.89631	3.07401
235.75	18.5271	21.5161	8.93509	3.14987
236	18.5559	21.4896	8.9726	3.22102
236.25	18.5809	21.4567	9.01766	3.29368
236.5	18.6074	21.4218	9.06382	3.36678
236.75	18.6346	21.3879	9.1155	3.43776
237	18.6611	21.3508	9.16727	3.50613
237.25	18.6907	21.314	9.22438	3.57725
237.5	18.7182	21.277	9.28396	3.6476
237.75	18.745	21.2436	9.34485	3.71686
238	18.7714	21.2087	9.41058	3.78589
238.25	18.7985	21.1797	9.47705	3.85425
238.5	18.8248	21.152	9.54567	3.92142
238.75	18.8498	21.1282	9.61324	3.98915
239	18.8719	21.1042	9.68416	4.05836
239.25	18.8971	21.0892	9.75223	4.12632
239.5	18.9187	21.0769	9.82267	4.19438
239.75	18.9402	21.0738	9.88949	4.26305
240	18.9592	21.0711	9.95335	4.33297
240.25	18.9802	21.0747	10.015	4.40305
240.5	18.9972	21.0852	10.0748	4.47322
240.75	19.0128	21.0994	10.1299	4.5438
241	19.0339	21.117	10.185	4.61659
241.25	19.0489	21.1429	10.2343	4.68847
241.5	19.0693	21.1734	10.2801	4.75972
241.75	19.0839	21.2113	10.3243	4.83395
242	19.1048	21.2532	10.3603	4.90754
242.25	19.1268	21.3019	10.3989	4.98257
242.5	19.1487	21.3515	10.4306	5.05538
242.75	19.1754	21.4057	10.4606	5.13009
243	19.1963	21.4649	10.4881	5.2046
243.25	19.2238	21.5258	10.5125	5.28058
243.5	19.2505	21.5897	10.535	5.35449
243.75	19.2764	21.6583	10.5551	5.42896
244	19.3074	21.72	10.5754	5.505
244.25	19.3312	21.7905	10.5957	5.58007
244.5	19.3619	21.8601	10.6137	5.65354
244.75	19.392	21.9262	10.6318	5.72738
245	19.4174	21.9986	10.6499	5.80118
245.25	19.4454	22.0658	10.6655	5.87556
245.5	19.4721	22.1353	10.6803	5.9484
245.75	19.4987	22.2053	10.6971	6.0194
246	19.5244	22.2711	10.7119	6.09055
246.25	19.5482	22.3361	10.7246	6.16322
246.5	19.5774	22.3988	10.7377	6.23249
246.75	19.6007	22.4602	10.7505	6.30258
247	19.6213	22.5164	10.7607	6.37212
247.25	19.6441	22.5714	10.7701	6.44247
247.5	19.6659	22.6229	10.7806	6.51232
247.75	19.6884	22.6739	10.7865	6.58144
248	19.7103	22.7125	10.794	6.6524
248.25	19.7324	22.7544	10.799	6.72244
248.5	19.752	22.7916	10.8074	6.79163
248.75	19.7742	22.8243	10.8124	6.86218
249	19.7916	22.8469	10.8165	6.93281
249.25	19.8105	22.8719	10.8209	7.00307
249.5	19.8332	22.8896	10.8288	7.07486
249.75	19.8514	22.9075	10.8324	7.14886
250	19.8703	22.9224	10.8378	7.21822
250.25	19.8922	22.9323	10.8457	7.29004
250.5	19.9116	22.9336	10.8508	7.36253
250.75	19.9287	22.9362	10.8566	7.43579
251	19.9473	22.9382	10.8616	7.50779
251.25	19.9677	22.9361	10.8694	7.5823
251.5	19.9863	22.9336	10.8748	7.6575
251.75	20.0051	22.9271	10.8818	7.73157
252	20.0239	22.9183	10.8864	7.8046
252.25	20.0423	22.907	10.8932	7.87999
252.5	20.0598	22.8942	10.8994	7.95446
252.75	20.0739	22.8769	10.9056	8.02949
253	20.0905	22.8562	10.9133	8.10503
253.25	20.1032	22.8331	10.9203	8.17908
253.5	20.1194	22.8079	10.9278	8.25041
253.75	20.1388	22.7774	10.9358	8.32346
254	20.1509	22.7443	10.943	8.39538
254.25	20.1622	22.7074	10.9527	8.46532
254.5	20.176	22.6686	10.9592	8.53525
254.75	20.1862	22.631	10.9669	8.60429
255	20.1952	22.586	10.9757	8.67442
255.25	20.2011	22.5417	10.9827	8.74071
255.5	20.2095	22.4948	10.9898	8.80839
255.75	20.2145	22.4497	10.9968	8.87544
256	20.2175	22.3995	11.0018	8.94174
256.25	20.2203	22.3576	11.0046	9.0077
256.5	20.2226	22.3161	11.008	9.07485
256.75	20.2221	22.2743	11.0076	9.14096
257	20.2194	22.2374	11.008	9.20477
257.25	20.2198	22.1994	11.0048	9.26924
257.5	20.2184	22.1735	11.0007	9.33153
257.75	20.2165	22.147	10.9931	9.39519
258	20.2155	22.1236	10.9834	9.45737
258.25	20.2163	22.1113	10.9744	9.51867
258.5	20.2161	22.0951	10.9626	9.58023
258.75	20.2216	22.0903	10.9483	9.64112
259	20.2182	22.0902	10.9323	9.70039
259.25	20.2244	22.0941	10.9142	9.75757
259.5	20.2273	22.1004	10.8957	9.81611
259.75	20.2312	22.1123	10.8748	9.87265
260	20.2371	22.1271	10.8547	9.92923
260.25	20.2382	22.144	10.83	9.98309
260.5	20.242	22.1639	10.8064	10.0359
260.75	20.2417	22.1842	10.7808	10.091
261	20.2427	22.2003	10.7578	10.1437
261.25	20.2404	22.2192	10.7323	10.1964
261.5	20.2307	22.234	10.7064	10.2469
261.75	20.2225	22.2446	10.6782	10.2983
262	20.2064	22.2551	10.653	10.349
262.25	20.1918	22.2583	10.624	10.3974
262.5	20.1737	22.2556	10.5956	10.4434
262.75	20.1516	22.2537	10.5696	10.4889
263	20.1259	22.2411	10.5387	10.533
263.25	20.097	22.2285	10.5143	10.5746
263.5	20.0684	22.21	10.4879	10.6159
263.75	20.0342	22.1881	10.4598	10.6552
264	20.0003	22.1599	10.4337	10.6934
264.25	19.9609	22.1288	10.4072	10.7273
264.5	19.9185	22.0946	10.382	10.7618
264.75	19.876	22.0592	10.3577	10.7958
265	19.8295	22.0139	10.3348	10.8262
265.25	19.7778	21.9723	10.314	10.8552
265.5	19.7275	21.9256	10.2968	10.8833
265.75	19.6783	21.8754	10.2778	10.912
266	19.6236	21.8204	10.2623	10.9377
266.25	19.5671	21.7697	10.249	10.9606
266.5	19.5114	21.7144	10.2372	10.9852
266.75	19.4501	21.6576	10.2282	11.0065
267	19.392	21.5997	10.2208	11.0295
267.25	19.3309	21.54	10.2151	11.0481
267.5	19.2678	21.4828	10.2093	11.0664
267.75	19.2026	21.4234	10.2066	11.0841
268	19.1391	21.363	10.2042	11.1022
268.25	19.07	21.3008	10.2021	11.1185
268.5	19.004	21.2385	10.1993	11.1344
268.75	18.9372	21.1756	10.1973	11.1499
269	18.8629	21.1097	10.1917	11.1659
269.25	18.7906	21.0438	10.1881	11.1833
269.5	18.7162	20.9751	10.1801	11.1963
269.75	18.6433	20.9068	10.1712	11.2119
270	18.5654	20.8385	10.1605	11.2283
270.25	18.4909	20.7649	10.149	11.2422
270.5	18.4134	20.6916	10.1332	11.2567
270.75	18.3373	20.6195	10.1149	11.2722
271	18.2582	20.5413	10.095	11.286
271.25	18.1792	20.4626	10.0732	11.3
271.5	18.1029	20.3831	10.0477	11.3146
271.75	18.0195	20.3006	10.0214	11.3307
272	17.9403	20.2182	9.99259	11.3453
272.25	17.8611	20.1323	9.96123	11.3599
272.5	17.7813	20.0451	9.92882	11.3764
272.75	17.6985	19.9565	9.89511	11.3923
273	17.6201	19.869	9.8593	11.408
273.25	17.5421	19.7795	9.82085	11.4239
273.5	17.4688	19.6889	9.78483	11.4413
273.75	17.3899	19.5986	9.74694	11.4595
274	17.3103	19.5065	9.70816	11.4789
274.25	17.2344	19.4195	9.66881	11.4965
274.5	17.1585	19.3286	9.62687	11.5177
274.75	17.0836	19.2433	9.58892	11.5368
275	17.0088	19.1601	9.55217	11.5573
275.25	16.9373	19.0794	9.5142	11.5802
275.5	16.8665	18.9957	9.47549	11.6021
275.75	16.7963	18.919	9.43844	11.627
276	16.7275	18.8469	9.40333	11.6543
276.25	16.6668	18.7717	9.36757	11.6806
276.5	16.5989	18.7043	9.33464	11.7085
276.75	16.5401	18.6394	9.30022	11.7353
277	16.4814	18.5762	9.26857	11.763
277.25	16.4237	18.5155	9.23779	11.7941
277.5	16.3706	18.4606	9.20911	11.8245
277.75	16.3149	18.4057	9.17942	11.8549
278	16.2636	18.3553	9.15425	11.885
278.25	16.2099	18.3112	9.12884	11.9158
278.5	16.1604	18.2647	9.10421	11.9444
278.75	16.1129	18.2251	9.07805	11.9767
279	16.0626	18.1894	9.05701	12.0074
279.25	16.0167	18.1542	9.03436	12.0366
279.5	15.9692	18.1216	9.01347	12.0673
279.75	15.9249	18.089	8.99256	12.0963
280	15.8802	18.0611	8.97339	12.1273
280.25	15.837	18.034	8.95466	12.1563
280.5	15.7913	18.0064	8.93656	12.1824
280.75	15.7483	17.9798	8.91666	12.2094
281	15.7031	17.9517	8.8991	12.235
281.25	15.6603	17.9284	8.88152	12.2588
281.5	15.6192	17.9042	8.86455	12.2816
281.75	15.5751	17.8822	8.84676	12.3013
282	15.5346	17.8567	8.82757	12.3212
282.25	15.4897	17.8371	8.80782	12.3383
282.5	15.4477	17.8103	8.78697	12.3523
282.75	15.4039	17.7875	8.76796	12.3649
283	15.3618	17.7663	8.74647	12.3735
283.25	15.3196	17.7453	8.72132	12.3813
283.5	15.2783	17.7208	8.69937	12.3854
283.75	15.2375	17.6996	8.67312	12.3867
284	15.1935	17.676	8.64741	12.3869
284.25	15.1552	17.6552	8.62156	12.3854
284.5	15.1143	17.6277	8.59399	12.3808
284.75	15.0718	17.6048	8.56587	12.3767
285	15.0318	17.5763	8.53764	12.3677
285.25	14.9876	17.5492	8.5064	12.3595
285.5	14.9436	17.5231	8.47677	12.3483
285.75	14.8979	17.4914	8.4439	12.3376
286	14.8488	17.4586	8.41085	12.3258
286.25	14.8005	17.4219	8.37798	12.315
286.5	14.7492	17.3903	8.34145	12.3035
286.75	14.6959	17.3509	8.30469	12.2959
287	14.6408	17.3134	8.26626	12.2845
287.25	14.5844	17.2688	8.22584	12.2776
287.5	14.529	17.2233	8.18373	12.27
287.75	14.4681	17.1802	8.13887	12.2657
288	14.4079	17.1299	8.09561	12.2634
288.25	14.3437	17.0801	8.048	12.2625
288.5	14.2852	17.0226	8.00146	12.2639
288.75	14.219	16.967	7.95321	12.2676
289	14.1538	16.9099	7.90316	12.2748
289.25	14.0932	16.8484	7.85318	12.2821
289.5	14.0285	16.7879	7.80044	12.2924
289.75	13.9669	16.7251	7.75137	12.3047
290	13.9075	16.6604	7.6991	12.3177
290.25	13.8462	16.5955	7.65036	12.3309
290.5	13.785	16.5297	7.5986	12.3505
290.75	13.7289	16.4648	7.5486	12.3679
291	13.6695	16.3972	7.49737	12.3864
291.25	13.6098	16.3295	7.44828	12.4049
291.5	13.5522	16.2638	7.40003	12.4223
291.75	13.493	16.2007	7.35013	12.4391
292	13.4339	16.1322	7.30148	12.4569
292.25	13.372	16.0673	7.25381	12.4722
292.5	13.3109	16.0023	7.20836	12.4852
292.75	13.2469	15.9419	7.16387	12.4978
293	13.1809	15.8795	7.12003	12.5094
293.25	13.1205	15.8169	7.07926	12.5184
293.5	13.0535	15.7563	7.0388	12.5238
293.75	12.9848	15.6951	6.99991	12.5294
294	12.9155	15.6336	6.9628	12.5335
294.25	12.8425	15.574	6.92727	12.5364
294.5	12.7734	15.5127	6.89305	12.5372
294.75	12.6996	15.4499	6.86159	12.5387
295	12.6217	15.3873	6.83085	12.5359
295.25	12.5436	15.3202	6.80102	12.5328
295.5	12.4632	15.2586	6.77299	12.5296
295.75	12.3817	15.1902	6.74845	12.525
296	12.3026	15.1262	6.72526	12.5207
296.25	12.2179	15.058	6.7005	12.5136
296.5	12.1356	14.9886	6.68086	12.5066
296.75	12.0533	14.9173	6.66081	12.4984
297	11.9717	14.8459	6.64299	12.4902
297.25	11.8934	14.7733	6.62713	12.4801
297.5	11.8146	14.7033	6.6126	12.4709
297.75	11.7415	14.6284	6.60082	12.461
298	11.6682	14.5525	6.59449	12.4512
298.25	11.5978	14.4792	6.58916	12.4412
298.5	11.5286	14.4003	6.58488	12.4324
298.75	11.4633	14.3215	6.58358	12.4205
299	11.3999	14.2427	6.58529	12.4128
299.25	11.3424	14.1589	6.58858	12.4014
299.5	11.2863	14.0751	6.59431	12.3911
299.75	11.2292	13.9936	6.60409	12.3815
300	11.1768	13.9057	6.61402	12.3705
300.25	11.1244	13.8188	6.62745	12.3599
300.5	11.0754	13.7262	6.64186	12.3499
300.75	11.0279	13.6414	6.65739	12.3378
301	10.9757	13.549	6.67295	12.328
301.25	10.93	13.4559	6.68971	12.3161
301.5	10.8796	13.3635	6.70554	12.3029
301.75	10.8301	13.2699	6.7214	12.2914
302	10.7794	13.1783	6.7373	12.2768
302.25	10.7285	13.0831	6.75477	12.2627
302.5	10.6802	12.9913	6.76989	12.2472
302.75	10.6229	12.8984	6.78366	12.2327
303	10.5719	12.8067	6.79696	12.2188
303.25	10.5141	12.7105	6.80807	12.2035
303.5	10.4589	12.618	6.81831	12.1875
303.75	10.3994	12.5259	6.82679	12.1744
304	10.3408	12.4338	6.83262	12.16
304.25	10.2791	12.3474	6.83679	12.1441
304.5	10.2186	12.2586	6.84024	12.131
304.75	10.1542	12.1715	6.8433	12.1183
305	10.0876	12.0837	6.83981	12.1032
305.25	10.0186	12.0037	6.83768	12.0908
305.5	9.95202	11.9218	6.83437	12.0777
305.75	9.88193	11.8396	6.82638	12.0662
306	9.8102	11.7648	6.81996	12.0542
306.25	9.73383	11.6914	6.80904	12.0448
306.5	9.66071	11.6217	6.79727	12.0339
306.75	9.58871	11.5552	6.78128	12.0277
307	9.51032	11.4948	6.76682	12.0187
307.25	9.43739	11.4379	6.74762	12.0115
307.5	9.36135	11.386	6.72666	12.0077
307.75	9.28635	11.3369	6.70664	12.0029
308	9.2137	11.2927	6.68289	11.9995
308.25	9.14094	11.2517	6.657	11.9985
308.5	9.06798	11.2178	6.62981	11.9973
308.75	8.99697	11.1848	6.60222	11.9978
309	8.92389	11.1591	6.5703	11.9987
309.25	8.85881	11.1339	6.54176	12.0014
309.5	8.79047	11.1164	6.51063	12.0049
309.75	8.72591	11.0985	6.4794	12.0047
310	8.6605	11.0817	6.44731	12.0088
310.25	8.6006	11.0722	6.41677	12.0134
310.5	8.53914	11.0608	6.38669	12.0184
310.75	8.48154	11.0538	6.35481	12.0216
311	8.42859	11.0468	6.32651	12.0278
311.25	8.37137	11.0411	6.2989	12.0339
311.5	8.31978	11.0389	6.27177	12.0396
311.75	8.26918	11.033	6.24537	12.0454
312	8.21949	11.032	6.22285	12.0506
312.25	8.17059	11.0285	6.20001	12.0559
312.5	8.12056	11.0273	6.17938	12.0617
312.75	8.07527	11.0231	6.16113	12.0661
313	8.03008	11.0153	6.14412	12.068
313.25	7.98581	11.0107	6.12763	12.0713
313.5	7.94572	11.0019	6.1123	12.071
313.75	7.90522	10.9939	6.10047	12.0726
314	7.86844	10.9764	6.08805	12.0718
314.25	7.83451	10.957	6.07555	12.0683
314.5	7.80318	10.9344	6.06604	12.0642
314.75	7.77058	10.9061	6.0572	12.059
315	7.74101	10.8704	6.04999	12.0532
315.25	7.71607	10.8272	6.04086	12.0448
315.5	7.68902	10.7835	6.03571	12.0365
315.75	7.6669	10.729	6.02961	12.0282
316	7.64671	10.6716	6.02475	12.0159
316.25	7.62095	10.6058	6.02171	12.0083
316.5	7.60363	10.5369	6.01717	11.9973
316.75	7.57997	10.4599	6.01244	11.989
317	7.56432	10.379	6.00926	11.9787
317.25	7.54163	10.2946	6.00512	11.9707
317.5	7.52055	10.2069	5.99929	11.961
317.75	7.4934	10.1144	5.99462	11.9548
318	7.46979	10.0169	5.98642	11.947
318.25	7.44408	9.91542	5.97961	11.9389
318.5	7.41428	9.81356	5.97024	11.9335
318.75	7.38395	9.7085	5.96051	11.925
319	7.35047	9.59763	5.94979	11.9222
319.25	7.3156	9.4924	5.93814	11.9141
319.5	7.27965	9.37629	5.92502	11.9085
319.75	7.24374	9.26611	5.91199	11.9027
320	7.20285	9.15489	5.89645	11.8958
320.25	7.1598	9.04459	5.88262	11.8881
320.5	7.11564	8.93051	5.86697	11.8791
320.75	7.07065	8.81984	5.84851	11.8732
321	7.02916	8.71079	5.832	11.8621
321.25	6.98523	8.59955	5.81385	11.8498
321.5	6.93869	8.49239	5.79536	11.8377
321.75	6.89312	8.38963	5.77848	11.8218
322	6.84466	8.28521	5.75943	11.8098
322.25	6.80114	8.189	5.74096	11.7906
322.5	6.75498	8.08971	5.7222	11.7707
322.75	6.70727	7.99757	5.70267	11.7519
323	6.6634	7.90393	5.68313	11.7289
323.25	6.62075	7.81631	5.66386	11.7077
323.5	6.57705	7.7304	5.64297	11.6829
323.75	6.5302	7.6521	5.62388	11.6561
324	6.48711	7.5732	5.60313	11.6316
324.25	6.44455	7.49658	5.58382	11.6053
324.5	6.40362	7.42471	5.56541	11.5777
324.75	6.36374	7.35792	5.54479	11.552
325	6.32041	7.29449	5.52734	11.5241
325.25	6.27632	7.22774	5.5059	11.4968
325.5	6.23793	7.16524	5.48804	11.4711
325.75	6.19628	7.10445	5.47028	11.4451
326	6.15526	7.04204	5.45076	11.4186
326.25	6.11164	6.98297	5.43117	11.3935
326.5	6.06911	6.92183	5.41721	11.3693
326.75	6.02691	6.86137	5.39728	11.3452
327	5.98611	6.79723	5.38204	11.3229
327.25	5.94271	6.73119	5.36639	11.3009
327.5	5.89901	6.66887	5.35184	11.2784
327.75	5.85451	6.60201	5.33567	11.2585
328	5.81099	6.53307	5.32074	11.2367
328.25	5.76503	6.46577	5.30429	11.216
328.5	5.71722	6.39148	5.29023	11.195
328.75	5.67183	6.32039	5.27317	11.1765
329	5.62872	6.24583	5.25897	11.1604
329.25	5.58348	6.16792	5.24247	11.1429
329.5	5.5382	6.09089	5.22832	11.1247
329.75	5.49382	6.00765	5.21077	11.1069
330	5.44986	5.92603	5.19452	11.0904
330.25	5.40666	5.84124	5.17781	11.0737
330.5	5.36937	5.75685	5.16018	11.0553
330.75	5.33182	5.66714	5.14193	11.0381
331	5.29537	5.58403	5.12623	11.0186
331.25	5.2595	5.49593	5.10707	11.0009
331.5	5.22543	5.40937	5.08953	10.9825
331.75	5.19272	5.32448	5.07287	10.9609
332	5.16283	5.24097	5.05546	10.938
332.25	5.13413	5.15955	5.03819	10.9161
332.5	5.10256	5.07977	5.01966	10.8941
332.75	5.07625	5.00213	5.00327	10.8698
333	5.04754	4.92907	4.98673	10.8475
333.25	5.02292	4.85583	4.97046	10.8223
333.5	4.99681	4.79047	4.95218	10.7986
333.75	4.97178	4.7228	4.93668	10.7746
334	4.94692	4.66295	4.91848	10.7494
334.25	4.92001	4.60699	4.90281	10.7259
334.5	4.89193	4.55016	4.88423	10.702
334.75	4.86697	4.49972	4.86736	10.6793
335	4.83736	4.44966	4.85173	10.6536
335.25	4.81287	4.40477	4.83304	10.6309
335.5	4.78343	4.35945	4.8153	10.6065
335.75	4.75695	4.31941	4.79846	10.5815
336	4.73044	4.27865	4.78037	10.5581
336.25	4.70302	4.24023	4.75881	10.534
336.5	4.67593	4.20054	4.7399	10.5114
336.75	4.64666	4.16485	4.72001	10.4844
337	4.62104	4.13152	4.69853	10.4584
337.25	4.59279	4.09599	4.67456	10.4357
337.5	4.5648	4.05974	4.65219	10.4084
337.75	4.53596	4.025	4.62621	10.3828
338	4.5065	3.98702	4.59987	10.3565
338.25	4.47331	3.95445	4.5709	10.3315
338.5	4.44451	3.91528	4.54205	10.3046
338.75	4.40995	3.87227	4.51278	10.2797
339	4.37447	3.83167	4.47981	10.2528
339.25	4.33729	3.7882	4.44756	10.2261
339.5	4.29726	3.74093	4.41036	10.2016
339.75	4.26139	3.6923	4.37435	10.1769
340	4.22265	3.64345	4.33698	10.1521
340.25	4.1808	3.59067	4.29766	10.1248
340.5	4.13773	3.53728	4.25718	10.1002
340.75	4.09417	3.48134	4.21622	10.0773
341	4.04884	3.42449	4.17417	10.0527
341.25	4.00543	3.36335	4.13347	10.0287
341.5	3.95924	3.303	4.09333	10.0056
341.75	3.90904	3.24583	4.05237	9.98386
342	3.86026	3.18272	4.01273	9.95855
342.25	3.81579	3.12544	3.97455	9.9364
342.5	3.76289	3.06099	3.93611	9.91312
342.75	3.71337	2.99567	3.89888	9.88947
343	3.66322	2.9332	3.86486	9.86691
343.25	3.61241	2.86782	3.83236	9.84219
343.5	3.56216	2.79905	3.79986	9.81688
343.75	3.51067	2.73405	3.77118	9.79305
344	3.46087	2.66406	3.74313	9.76627
344.25	3.40869	2.59632	3.71734	9.74114
344.5	3.35459	2.52209	3.68999	9.71476
344.75	3.30173	2.44971	3.66698	9.68763
345	3.2502	2.37249	3.64458	9.65965
345.25	3.19801	2.29597	3.62515	9.63086
345.5	3.14261	2.21731	3.60445	9.60181
345.75	3.091	2.13707	3.5863	9.57125
346	3.03566	2.05053	3.56718	9.54317
346.25	2.98364	1.96728	3.54743	9.5105
346.5	2.93041	1.88603	3.52655	9.47761
346.75	2.87577	1.79674	3.50645	9.44299
347	2.82392	1.70875	3.48567	9.41069
347.25	2.77353	1.61833	3.46271	9.37479
347.5	2.72108	1.52842	3.43801	9.33715
347.75	2.67314	1.43582	3.41142	9.29896
348	2.61894	1.34231	3.38313	9.26257
348.25	2.56873	1.25035	3.35216	9.2241
348.5	2.51444	1.15425	3.31979	9.18074
348.75	2.46725	1.0557	3.28548	9.13951
349	2.41567	0.958222	3.24848	9.09581
349.25	2.36439	0.854971	3.21036	9.04944
349.5	2.31052	0.749387	3.1692	9.0047
349.75	2.25938	0.64337	3.12907	8.96008
350	2.21361	0.535019	3.08563	8.91209
350.25	2.1608	0.419571	3.04204	8.86408
350.5	2.11158	0.308696	2.99678	8.8147
350.75	2.06281	0.193255	2.95243	8.765
351	2.01779	0.0784501	2.90538	8.71547
351.25	1.96776	-0.0338787	2.85997	8.66465
351.5	1.91801	-0.149096	2.80987	8.61523
351.75	1.87339	-0.262285	2.76292	8.5649
352	1.82429	-0.37126	2.7132	8.51526
352.25	1.78166	-0.480175	2.66275	8.46552
352.5	1.73715	-0.588002	2.61416	8.4161
352.75	1.68948	-0.691029	2.56287	8.36813
353	1.64619	-0.788998	2.5126	8.31824
353.25	1.60562	-0.883308	2.46068	8.2706
353.5	1.56379	-0.972436	2.40942	8.22446
353.75	1.52836	-1.05919	2.35693	8.17679
354	1.48836	-1.14076	2.30448	8.13167
354.25	1.45039	-1.21026	2.25392	8.08541
354.5	1.41683	-1.28204	2.19932	8.04107
354.75	1.38143	-1.34103	2.1473	7.9982
355	1.34996	-1.39883	2.09452	7.95634
355.25	1.31599	-1.44728	2.04135	7.91426
355.5	1.2834	-1.49191	1.98881	7.87525
355.75	1.25479	-1.52876	1.93566	7.83416
356	1.22291	-1.55779	1.88285	7.79673
356.25	1.19762	-1.58594	1.83244	7.7593
356.5	1.16838	-1.60728	1.78004	7.7205
356.75	1.14368	-1.6203	1.72956	7.68471
357	1.11711	-1.63742	1.68128	7.65104
357.25	1.09119	-1.64233	1.63169	7.61571
357.5	1.0711	-1.64466	1.58515	7.58189
357.75	1.04987	-1.64661	1.53579	7.54664
358	1.02943	-1.64427	1.48834	7.51274
358.25	1.0067	-1.63794	1.44061	7.48183
358.5	0.986182	-1.63019	1.39374	7.45057
358.75	0.966883	-1.62231	1.34786	7.41656
359	0.950848	-1.60954	1.29915	7.38519
359.25	0.932082	-1.59639	1.25074	7.35495
359.5	0.913096	-1.58109	1.20362	7.32299
359.75	0.891195	-1.56111	1.15393	7.29482
360	0.871768	-1.54681	1.10371	7.26426
360.25	0.854346	-1.52587	1.05328	7.23408
360.5	0.83467	-1.50312	1.0004	7.2049
360.75	0.81476	-1.48203	0.94613	7.17576
361	0.790519	-1.45992	0.893272	7.14863
361.25	0.765246	-1.43517	0.836776	7.12054
361.5	0.739875	-1.40977	0.780327	7.09367
361.75	0.710144	-1.38538	0.722089	7.06667
362	0.680897	-1.35804	0.664041	7.03827
362.25	0.64749	-1.33231	0.605376	7.01256
362.5	0.614353	-1.30729	0.546782	6.98556
362.75	0.577718	-1.28336	0.487228	6.9591
363	0.540834	-1.25456	0.428718	6.93354
363.25	0.501539	-1.22807	0.367825	6.90657
363.5	0.462763	-1.20039	0.310404	6.87851
363.75	0.422871	-1.17751	0.252095	6.85004
364	0.380248	-1.1465	0.193904	6.82387
364.25	0.341174	-1.12327	0.13454	6.79655
364.5	0.304482	-1.09779	0.0775577	6.76776
364.75	0.2638	-1.0735	0.0163097	6.74009
365	0.225181	-1.04516	-0.0401038	6.7118
365.25	0.186591	-1.02378	-0.099065	6.68467
365.5	0.144914	-1.00361	-0.157446	6.65856
365.75	0.109863	-0.986859	-0.216691	6.63244
366	0.0687341	-0.967401	-0.27487	6.60645
366.25	0.0336774	-0.954964	-0.336747	6.58115
366.5	-0.00964202	-0.94354	-0.398066	6.5602
366.75	-0.0460711	-0.937744	-0.459481	6.5376
367	-0.082813	-0.931953	-0.524628	6.51892
367.25	-0.11932	-0.928485	-0.587986	6.50062
367.5	-0.15459	-0.927903	-0.653738	6.48218
367.75	-0.191567	-0.928602	-0.720166	6.46945
368	-0.229532	-0.929086	-0.788075	6.45397
368.25	-0.264994	-0.933938	-0.855451	6.44145
368.5	-0.301893	-0.937187	-0.922696	6.43159
368.75	-0.3367	-0.94087	-0.99147	6.41906
369	-0.371081	-0.945106	-1.05959	6.40744
369.25	-0.405079	-0.950648	-1.12702	6.3976
369.5	-0.44256	-0.954083	-1.19527	6.38659
369.75	-0.47323	-0.955851	-1.26177	6.37617
370	-0.509474	-0.955436	-1.32548	6.36279
370.25	-0.539532	-0.959487	-1.39021	6.35096
370.5	-0.574304	-0.95998	-1.45241	6.33675
370.75	-0.606943	-0.961127	-1.51675	6.32187
371	-0.63705	-0.958726	-1.57827	6.30805
371.25	-0.672257	-0.959399	-1.63803	6.29289
371.5	-0.705187	-0.95961	-1.69654	6.27715
371.75	-0.739184	-0.959157	-1.75269	6.26137
372	-0.777647	-0.960727	-1.80736	6.24479
372.25	-0.814147	-0.961686	-1.85796	6.22778
372.5	-0.857438	-0.966487	-1.91054	6.21182
372.75	-0.900829	-0.971505	-1.95891	6.19392
373	-0.949723	-0.978788	-2.00484	6.17673
373.25	-0.995489	-0.988862	-2.04808	6.15932
373.5	-1.04733	-1.00323	-2.09106	6.14185
373.75	-1.09919	-1.01498	-2.13094	6.12336
374	-1.15805	-1.03468	-2.16721	6.10795
374.25	-1.21537	-1.05714	-2.20436	6.08697
[truncated: 562 more rows]
